# Supplementary material for: The association between the neighbourhood social environment and obesity in Brazil: a cross-sectional analysis of the ELSA-Brasil study
Source: PubMed Central journal article supplement — BMJ Open. 2019 Sep 6;9(9):e026800. doi: 10.1136/bmjopen-2018-026800 (PMC6731797; doi:10.1136/bmjopen-2018-026800), 2019-09-06
Supplement: bmjopen-2018-026800.draft_revisions.pdf [file bmjopen-2018-026800.draft_revisions.pdf]

# BMJ Open

BMJ Open is committed to open peer review. As part of this commitment we make the peer review history of every article we publish publicly available.

When an article is published we post the peer reviewers' comments and the authors' responses online. We also post the versions of the paper that were used during peer review. These are the versions that the peer review comments apply to.

The versions of the paper that follow are the versions that were submitted during the peer review process. They are not the versions of record or the final published versions. They should not be cited or distributed as the published version of this manuscript.

BMJ Open is an open access journal and the full, final, typeset and author-corrected version of record of the manuscript is available on our site with no access controls, subscription charges or pay-per-view fees (<http://bmjopen.bmj.com>).

If you have any questions on BMJ Open's open peer review process please email [info.bmjopen@bmj.com](mailto:info.bmjopen@bmj.com)

# BMJ Open

## The association between the neighborhood social environment and obesity in Brazil varies by gender and neighborhood socioeconomic status: a multilevel study

|                               |                                                                                                                                                                                                                                                                                                                                                                                                                                                                                                                                                                                                                                                                                                                                                                                                                                                                                                                                                                                                                         |
|-------------------------------|-------------------------------------------------------------------------------------------------------------------------------------------------------------------------------------------------------------------------------------------------------------------------------------------------------------------------------------------------------------------------------------------------------------------------------------------------------------------------------------------------------------------------------------------------------------------------------------------------------------------------------------------------------------------------------------------------------------------------------------------------------------------------------------------------------------------------------------------------------------------------------------------------------------------------------------------------------------------------------------------------------------------------|
| Journal:                      | <i>BMJ Open</i>                                                                                                                                                                                                                                                                                                                                                                                                                                                                                                                                                                                                                                                                                                                                                                                                                                                                                                                                                                                                         |
| Manuscript ID                 | bmjopen-2018-026800                                                                                                                                                                                                                                                                                                                                                                                                                                                                                                                                                                                                                                                                                                                                                                                                                                                                                                                                                                                                     |
| Article Type:                 | Research                                                                                                                                                                                                                                                                                                                                                                                                                                                                                                                                                                                                                                                                                                                                                                                                                                                                                                                                                                                                                |
| Date Submitted by the Author: | 25-Sep-2018                                                                                                                                                                                                                                                                                                                                                                                                                                                                                                                                                                                                                                                                                                                                                                                                                                                                                                                                                                                                             |
| Complete List of Authors:     | Chaparro, M. Pia; Tulane University School of Public Health and Tropical Medicine, Global Community Health and Behavioral Sciences<br>Pina, Maria; Fundacao Oswaldo Cruz, Laboratory of Health and Environment Education; INEB - Instituto de Engenharia Biomédica, Universidade do Porto<br>Cardoso, Letícia; Fundação Oswaldo Cruz., National School of Public Health Sergio Arouca<br>Santos, Simone; Fundação Oswaldo Cruz., National School of Public Health Sergio Arouca<br>Barreto, Sandhi; Hospital das Clinicas da Universidade Federal de Minas Gerais<br>Giatti, Luana; Universidade Federal da Ouro Preto, School of Nutrition<br>Matos, Sheila Maria; Universidade Federal da Bahia, Institute of Public Health<br>Mendes da Fonseca, Maria ; Fundacao Oswaldo Cruz, National School of Public Health Sergio Arouca<br>Chor, Dora; Oswaldo Cruz Foundation-National School of Public Health, Epidemiology<br>Griep, Rosane Haerter; Fundacao Oswaldo Cruz, Laboratory of Health and Environment Education |
| Keywords:                     | obesity, neighborhood, Brazil, social environment                                                                                                                                                                                                                                                                                                                                                                                                                                                                                                                                                                                                                                                                                                                                                                                                                                                                                                                                                                       |
|                               |                                                                                                                                                                                                                                                                                                                                                                                                                                                                                                                                                                                                                                                                                                                                                                                                                                                                                                                                                                                                                         |

SCHOLARONE™  
Manuscripts

1  
2  
3 **The association between the neighborhood social environment and obesity in Brazil varies**  
4  
5 **by gender and neighborhood socioeconomic status: a multilevel study**  
6  
7  
8  
9

10 M. Pia Chaparro,<sup>1</sup> M. Fatima Pina,<sup>2-4</sup> Leticia de Oliveira Cardoso,<sup>5</sup> Simone M. Santos,<sup>5</sup> Sandi  
11 Maria Barreto,<sup>6</sup> Luana Giatti Gonçalves,<sup>7</sup> Sheila M. Alvim de Matos,<sup>8</sup> Maria de Jesus Mendes da  
12 Fonseca,<sup>5</sup> Dóra Chor,<sup>5</sup> Rosane Härter Griep<sup>2</sup>  
13  
14  
15  
16  
17  
18

19 <sup>1</sup>Department of Global Community Health and Behavioral Sciences, School of Public Health and  
20 Tropical Medicine, Tulane University, New Orleans, LA, USA.  
21  
22

23 <sup>2</sup>Laboratory of Health and Environment Education, Oswaldo Cruz Institute, Fundação Oswaldo  
24 Cruz, Manguinhos, Rio de Janeiro, Brazil.  
25  
26  
27

28 <sup>3</sup>Institute of Biomedical Engineering (INEB), University of Porto, Porto, Portugal.  
29

30 <sup>4</sup>Institute of Research and Innovation in Health (i3s), University of Porto, Porto, Portugal.  
31  
32

33 <sup>5</sup>National School of Public Health Sergio Arouca, Fundação Oswaldo Cruz, Rio de Janeiro,  
34 Brazil.  
35  
36

37 <sup>6</sup>Medical School & Hospital das Clínicas, Federal University of Minas Gerais, Belo Horizonte,  
38 Minas Gerais, Brazil.  
39  
40

41 <sup>7</sup>School of Nutrition, Federal University of Ouro Preto, Ouro Preto, Minas Gerais, Brazil.  
42  
43

44 <sup>8</sup>Institute of Public Health, Federal University of Bahia, Salvador, Brazil.  
45  
46  
47  
48  
49  
50  
51  
52  
53  
54  
55  
56  
57  
58  
59  
60

1  
2  
3 **Corresponding author:** M. Pia Chaparro, MS, PhD (corresponding author)  
4  
5 Department of Global Community Health and Behavioral Sciences  
6  
7 School of Public Health and Tropical Medicine  
8  
9 Tulane University  
10  
11 1440 Canal St., suite 2200-16, mail code #8319  
12  
13 New Orleans, LA 70112  
14  
15 Tel. (504) 988-4533  
16  
17 Email: [pchaparro@tulane.edu](mailto:pchaparro@tulane.edu)  
18  
19  
20  
21  
22  
23

24 **Word count:** 2938  
25

26  
27 **Contributorship statement:** MFP, LOC, SMS, SMB, LGG, SMAM, MJMF, DC and RHG  
28  
29 were involved with data acquisition; MPC and MFP were in charge of data analysis with  
30  
31 guidance from LOC, SMS, DC, and RHG; all authors were involved in data interpretation; MPC  
32  
33 drafted the manuscript; all authors edited the manuscript and approved the final version for  
34  
35 submission. All authors take responsibility for the contents of this manuscript and agree to be  
36  
37 accountable for all aspects of the work.  
38  
39  
40  
41  
42  
43  
44  
45  
46  
47  
48  
49  
50  
51  
52  
53  
54  
55  
56  
57  
58  
59  
60

**ABSTRACT**

*Objective:* To investigate the association between the neighborhood social environment, including social cohesion, perceived neighborhood safety, perceived neighborhood violence, and obesity in Brazil.

*Setting:* 6 state capitals in Brazil (Salvador, Vitoria, Belo Horizonte, Porto Alegre, Sao Paulo, and Rio de Janeiro)

*Participants:* Current or former employees of 5 federal universities and 1 research center in each of the 6 Brazilian state capitals who were participants of the baseline wave (2008-2010) of the Brazilian Longitudinal Study of Adult Health (N=11,456; 56% women; 56% White, 28% Brown, and 16% Black).

*Primary outcome measure:* Obesity, based on measured weight and height, and defined as having a body mass index (BMI)  $>30\text{kg/m}^2$ .

*Results:* No associations were found between the neighborhood social environment and obesity among men. In multilevel logistic regression models adjusted for age, education, and skin color, women living in the least socially cohesive neighborhoods and in those perceived as most violent had higher odds of obesity compared to their counterparts (OR=1.25, 95%CI=1.01-1.55; OR=1.35, 95%CI=1.10-1.66, respectively). When stratified by neighborhood SES, results for social cohesion and for violence remained only for women residing in high SES and low SES neighborhoods, respectively.

*Conclusions:* Neighborhood-level interventions to increase social cohesion and reduce violence may help in the prevention of obesity among women in Brazil.

### STRENGTHS AND LIMITATIONS OF THE STUDY

- This is one of the first studies investigating the association between the neighborhood social environment and obesity in Latin America
- The sample comes from a well-defined cohort study in six large and diverse cities in Brazil, using validated questionnaires and scales, as well as measured weight and height
- This study is based on civil-servants, which excludes the extremely poor and unemployed, limiting generalizability

## INTRODUCTION

Research on neighborhoods and their influence on obesity focus on the physical environment, including the food and physical activity environments, as well as the social environment,<sup>1,2</sup> which refers to the social interactions (or lack thereof) that occur in the neighborhood between neighbors. The social environment includes concepts like social cohesion and social ties, as well as exposure to crime and violence, all of which have been linked to obesity.<sup>3</sup> Given the hypothesized link between neighborhoods and obesity, neighborhood-level interventions may be effective ways of influencing individual weight-related behaviors and thus preventing obesity, particularly among vulnerable populations.<sup>4</sup>

To date most evidence linking neighborhoods and obesity come from high-income countries, with still a limited amount of evidence available for low- and middle-income countries like those in Latin America.<sup>5</sup> This is despite the exponential increase in obesity observed in the region in the past two decades, and the widespread search for effective ways to curb the epidemic.<sup>6,7</sup> Research in Latin America has mostly focused on the food and physical activity environments,<sup>8-12</sup> with fewer studies assessing the neighborhood social environment as it pertains to obesity. Of those studying the social environment, most focus on neighborhood safety/crime. For example, neighborhood rates of homicides have been linked to obesity in Cali, Colombia<sup>13</sup> and Belo Horizonte, Brazil,<sup>14</sup> whereas perceiving one's neighborhood as unsafe was associated with decreased physical activity in Curitiba, Brazil,<sup>15</sup> Sao Paulo, Brazil,<sup>16</sup> and Florianopolis, Brazil.<sup>17</sup> To our knowledge, no studies in Latin America have looked into neighborhood social interactions – measured by social cohesion or social ties – and obesity, but a study in Belo Horizonte, Brazil found that neighborhood social cohesion was positively associated with physical activity.<sup>18</sup>

To fill-in such gaps in the literature and taking advantage of a rich and georeferenced dataset based on six large cities in Brazil, the aim of this study was to investigate if the neighborhood social environment – including social cohesion, perceived safety and violence – was associated with obesity among Brazilian adults, and to identify if this association varied by individual- and neighborhood-level socioeconomic status (SES).

## METHODS

Data comes from the baseline of the Brazilian Longitudinal Study of Adult Health (ELSA-Brasil), a multicenter cohort study designed to investigate the incidence and progression of cardiovascular disease and diabetes, as well as the biological, social, and environmental determinants of these conditions in the Brazilian population.<sup>19</sup> ELSA-Brasil data is collected among active and retired employees from universities/research centers located in six Brazilian state capitals: Salvador, Vitoria, Belo Horizonte, Porto Alegre, Sao Paulo, and Rio de Janeiro.<sup>19</sup>

Detailed data collection procedures are found elsewhere.<sup>19</sup> Briefly, participants were recruited via on-site and radio announcements, mailings, billboards, and phone calls. Eligible participants were also recruited using a list of employees stratified by age, gender, and occupation to ensure representativeness in key sub-groups. Baseline data collection occurred in 2008-2010, with a total sample of 15,105 (54% women), ages 35 to 74 years. Data collected relevant to the current study include measured weight and height, sociodemographic information (age, gender, educational attainment, self-reported skin color), and perceptions about participants' neighborhood.

Participants' residential addresses were georeferenced and aggregated at the neighborhood level. In Brazil, existing tracts used for census data collection are heterogenous in



1  
2  
3 terms of size and composition; they are often too small to capture the collective social processes  
4  
5 we are set to investigate, while also proving problematic for statistical analysis.<sup>20</sup> Therefore,  
6  
7 neighborhoods were constructed by combining contiguous census tracts with similar  
8  
9 sociodemographic composition based on four variables from the Brazilian Census 2010.<sup>21</sup>  
10  
11 number of people per household, proportion of children 0-4 years, mean income, and percent of  
12  
13 white residents, following the same methodology described by Santos et al. 2010.<sup>20</sup>  
14  
15 Neighborhoods were defined with a minimum population size of 5,000 inhabitants, a number  
16  
17 deemed appropriate to be able to distinguish between different socioeconomic patterns.<sup>20</sup> Our  
18  
19 sample includes 11,456 individuals with complete data and valid neighborhood definitions,  
20  
21 corresponding to 76% of the ELSA-Brasil participants; this sample lived in 1902 neighborhoods,  
22  
23 with a mean population of 6.02 individuals per neighborhood (SD 9.82).  
24  
25  
26  
27

28 ELSA-Brasil research protocol was approved by the Research Ethics Committees of São  
29  
30 Paulo University, Minas Gerais Federal University, Fundação Oswaldo Cruz, Espírito Santo  
31  
32 Federal University, Bahia Federal University, Rio Grande do Sul Federal University, and the  
33  
34 National Research Ethics Committee.  
35  
36

37 The outcome of this study was obesity, defined as having a body mass index (BMI)>30  
38  
39 kg/m<sup>2</sup>, based on measured weight and height. Our exposure variables were self-reported  
40  
41 measures of the neighborhood social environment, including social cohesion, perceived safety,  
42  
43 and perceived violence. Social cohesion, defined as the willingness of neighbors to intervene for  
44  
45 the good of the community,<sup>22</sup> was assessed with a 5-item scale: 1) this is a close-knit  
46  
47 neighborhood; 2) people around here are willing to help their neighbors; 3) people in this  
48  
49 neighborhood don't get along with each other; 4) people in this neighborhood do not share the  
50  
51 same values; and 5) people in this neighborhood can be trusted. Participants were asked their  
52  
53  
54  
55  
56  
57  
58  
59  
60

1  
2  
3 agreement level for these items using a 5-point Likert scale ranging from 1="completely agree"  
4 to 5="completely disagree," with scores ranging from 5-25. Reverse coding was used as needed  
5  
6 so that a higher score indicated a higher social cohesion.  
7  
8  
9

10 Perceived neighborhood safety was assessed with a 3-item scale: 1) I feel safe walking in  
11 my neighborhood, day or night; 2) violence is a problem in my neighborhood; and 3) my  
12 neighborhood is safe from crime, with participants reporting their agreement level with these  
13 items following the same 5-point Likert scale as above. Individual scores ranged from 3-15.  
14  
15 Items 1 and 3 were reverse coded so that a higher score indicated a higher perceived safety.  
16  
17  
18  
19  
20  
21  
22

23 Perceived neighborhood violence was assessed based on 5 items, referring to the previous  
24 6 months: 1) how often was there a fight in this neighborhood in which a weapon was used?; 2)  
25 how often was there a violent argument between neighbors?; 3) how often was there a gang  
26 fight?; 4) how often was there a sexual assault or rape?; and 5) how often was there a robbery or  
27 mugging?. Response options ranged from 1="frequently" to 4="never," with individual scores  
28 ranging from 5 to 20 and a higher score representing lower perceived violence.  
29  
30  
31  
32  
33  
34  
35  
36

37 For all these neighborhood scales, thus, a higher score meant something positive: higher  
38 social cohesion, higher perceived safety, and lower perceived violence. These three scales were  
39 cross-culturally adapted from existing validated ones,<sup>22,23</sup> including a translation and back-  
40 translation from English to Portuguese.<sup>24</sup> Test-retest reliability was assessed in a sub-sample of  
41 ELSA-Brasil participants to evaluate internal consistency and temporal stability of the  
42 measurements; the scales were found to have good internal consistency and very good  
43 reproducibility.<sup>24</sup>  
44  
45  
46  
47  
48  
49  
50  
51  
52  
53  
54  
55  
56  
57  
58  
59  
60

1  
2  
3 For all analyses, individual-level scores on social cohesion, perceived safety and  
4 perceived violence were each aggregated at the neighborhood level, so that all participants living  
5 in the same neighborhood would have the same level of exposure. Further, neighborhood-level  
6 scores were converted into tertiles to simplify interpretation as the three sets of scores followed  
7 different scales with different ranges of responses. Neighborhoods were then classified as being  
8 in the lowest, middle, or highest tertile of exposure for each neighborhood predictor.  
9

10  
11  
12 Covariates included participants' age (continuous), gender, educational attainment (less  
13 than primary, primary, high school, and university), and self-reported skin color (White, Brown  
14 ["mixed race"], Black, Asian, and Indigenous; Asian and Indigenous were dropped from the  
15 analysis because of their small sample size).  
16

17  
18  
19  
20  
21  
22  
23  
24  
25  
26  
27  
28  
29  
30  
31  
32  
33  
34  
35  
36  
37  
38  
39  
40  
41  
42  
43  
44  
45  
46  
47  
48  
49  
50  
51  
52  
53  
54  
55  
56  
57  
58  
59  
60  
Neighborhood SES was created based on the same four census variables used for  
neighborhood definition. A principal component analysis followed by a cluster analysis were  
used to classify neighborhoods into three SES categories. Two principal components emerged  
from the analysis, explaining 87% of the SES variability; the first component was composed by  
*number of people per household* and *proportion of children 0-4 years*, whereas the second  
component was composed by *median income* and *percent of white residents*. We forced these  
principal components into three clusters, which resulted in low, intermediate, and high  
neighborhood SES classifications.

### **Patient and public involvement**

Patients were not involved in the development of this study.

### **Statistical analysis**

1  
2  
3 We ran gender-stratified 3-level hierarchical multilevel logistic regression models as  
4  
5 individuals (level 1) were nested within neighborhoods (level 2) and within ELSA sites (level 3),  
6  
7 and the outcome variable (obesity) was dichotomous. Model 1 was adjusted by age, Model 2 was  
8  
9 further adjusted by education, and Model 3 was adjusted by age, education, and skin color.  
10  
11 Further, we ran models stratified by neighborhood SES to see if it modified the association  
12  
13 between the neighborhood social environment and obesity. For the latter models, neighborhood-  
14  
15 level scores of our three neighborhood variables were reconverted into tertiles *within* each  
16  
17 neighborhood SES category. All analyses were carried out in SAS v9.4 (SAS Institute Inc., Cary,  
18  
19 NC, USA) with a p-value<0.05 denoting statistical significance.  
20  
21  
22  
23  
24  
25  
26

## 27 RESULTS

28  
29  
30 Table 1 displays the sample characteristics sample by obesity. Obesity was more prevalent  
31  
32 among women (23%) than men (20%) and among middle-aged participants. We observed social  
33  
34 inequities based on education and skin color, with decreased obesity prevalence as education  
35  
36 increased, and black participants having the highest prevalence of obesity compared to white  
37  
38 participants (29% vs. 20%). We observed an obesity gradient for neighborhood social cohesion  
39  
40 and perceived violence, indicating that residents of the least cohesive and most self-perceived  
41  
42 violent neighborhoods had a higher prevalence of obesity than those in the most cohesive and  
43  
44 least violent neighborhoods, respectively. Residents of the poorest neighborhoods had a higher  
45  
46 obesity prevalence compared to those in the richest (26% vs. 19%).  
47  
48  
49  
50

51  
52 Results of the multilevel logistic regression models predicting obesity by neighborhood  
53  
54 social cohesion, perceived safety, and perceived violence are shown in Tables 2, 3, and 4,  
55  
56  
57  
58  
59

1  
2  
3 respectively. Neighborhood social cohesion was associated with obesity for women only, and  
4 this association remained after adjusting for age, education, and skin color. In fully adjusted  
5 models, women who lived in the least socially cohesive neighborhoods had 25% higher odds of  
6 being obese compared to women living in the most socially cohesive neighborhoods (Table 2).  
7  
8 We observed no associations between perceived safety and obesity (Table 3). In turn, perceived  
9 violence was associated with obesity among women only: women living in the most violent  
10 neighborhoods had 35% higher odds of obesity compared to women who lived in the least  
11 violent neighborhoods, adjusting for age, education, and skin color (Table 4).  
12  
13  
14  
15  
16  
17  
18  
19  
20  
21

22 Table 5 displays the results of the analysis stratified by neighborhood SES. For social  
23 cohesion, our results remained only among women living in high SES neighborhoods: women in  
24 the least socially cohesive neighborhoods had 54% higher odds of obesity compared to women  
25 living in the most socially cohesive neighborhoods *within high SES neighborhoods*. Oppositely,  
26 our results with perceived violence remained for women in poor neighborhoods: *within low SES*  
27 *neighborhoods*, women living in the most violent neighborhoods had 73% higher odds of obesity  
28 compared to those living in the least violent neighborhoods. Associations also emerged in the  
29 intermediate SES category, suggesting a dose-response association between perceived violence  
30 and obesity by neighborhood SES.  
31  
32  
33  
34  
35  
36  
37  
38  
39  
40  
41  
42  
43  
44  
45  
46  
47  
48  
49  
50  
51  
52  
53  
54  
55  
56  
57  
58  
59  
60

**Table 1:** Characteristics of the sub-sample of ELSA-Brasil participants included in the study, stratified by obesity status (N=11,456)

|                                               | <b>Not obese<br/>(BMI&lt;30<br/>kg/m<sup>2</sup>)<br/>Row %</b> | <b>Obese<br/>(BMI≥30 kg/m<sup>2</sup>)<br/>Row %</b> | <b>Total<br/>N (%)</b> |
|-----------------------------------------------|-----------------------------------------------------------------|------------------------------------------------------|------------------------|
| <b>INDIVIDUAL-LEVEL VARIABLES</b>             |                                                                 |                                                      |                        |
| <b>Gender</b>                                 |                                                                 |                                                      |                        |
| Women                                         | 76.6                                                            | 23.4                                                 | 6427 (56.1)            |
| Men                                           | 80.1                                                            | 19.9                                                 | 5025 (43.9)            |
| <b>Age group (years)</b>                      |                                                                 |                                                      |                        |
| 34-45                                         | 81.9                                                            | 18.1                                                 | 2841 (24.8)            |
| 46-55                                         | 76.9                                                            | 23.1                                                 | 4400 (38.4)            |
| 56-65                                         | 76.4                                                            | 23.6                                                 | 3077 (26.9)            |
| >65                                           | 78.5                                                            | 21.5                                                 | 1134 (9.9)             |
| <b>Education</b>                              |                                                                 |                                                      |                        |
| Less than primary                             | 72.0                                                            | 28.0                                                 | 522 (4.6)              |
| Primary                                       | 73.8                                                            | 26.2                                                 | 646 (5.6)              |
| Secondary                                     | 74.3                                                            | 25.7                                                 | 3543 (30.9)            |
| University                                    | 81.1                                                            | 18.9                                                 | 6741 (58.9)            |
| <b>Skin color</b>                             |                                                                 |                                                      |                        |
| White                                         | 80.3                                                            | 19.7                                                 | 6127 (56.2)            |
| Brown                                         | 77.3                                                            | 22.7                                                 | 3052 (28.0)            |
| Black                                         | 70.6                                                            | 29.4                                                 | 1719 (15.8)            |
| <b>NEIGHBORHOOD-LEVEL VARIABLES</b>           |                                                                 |                                                      |                        |
| <b>Social cohesion (mean 17.3, SD 3.6)</b>    |                                                                 |                                                      |                        |
| Lowest tertile                                | 76.0                                                            | 24.0                                                 | 2156 (18.8)            |
| Middle tertile                                | 78.3                                                            | 21.7                                                 | 5671 (49.5)            |
| Highest tertile                               | 79.2                                                            | 20.8                                                 | 3629 (31.7)            |
| <b>Perceived safety (mean 9.5, SD 3.2)</b>    |                                                                 |                                                      |                        |
| Lowest tertile                                | 76.8                                                            | 23.2                                                 | 2899 (25.3)            |
| Middle tertile                                | 79.1                                                            | 20.9                                                 | 4648 (40.6)            |
| Highest tertile                               | 78.1                                                            | 21.9                                                 | 3909 (34.1)            |
| <b>Perceived violence (mean 16.8, SD 2.8)</b> |                                                                 |                                                      |                        |
| Lowest tertile                                | 74.9                                                            | 25.1                                                 | 2584 (22.6)            |
| Middle tertile                                | 78.6                                                            | 21.4                                                 | 4783 (41.8)            |
| Highest tertile                               | 79.7                                                            | 20.3                                                 | 4089 (35.7)            |
| <b>Neighborhood SES</b>                       |                                                                 |                                                      |                        |
| Low                                           | 74.1                                                            | 25.9                                                 | 2812 (24.6)            |
| Intermediate                                  | 76.9                                                            | 23.1                                                 | 3418 (29.8)            |
| High                                          | 81.2                                                            | 18.8                                                 | 5225 (45.6)            |

1  
2  
3  
4  
5  
6  
7  
8  
9  
10  
11  
12  
13  
14  
15  
16  
17  
18  
19  
20  
21  
22  
23  
24  
25  
26  
27  
28  
29  
30  
31  
32  
33  
34  
35  
36  
37  
38  
39  
40  
41  
42  
43  
44  
45  
46  
47

**Table 2:** Results from the multilevel logistic regression model predicting obesity (BMI>30 kg/m<sup>2</sup>) by neighborhood social cohesion; gender-stratified (N= 6,104 women; 4,791 men)

|                        | Model 1<br>OR (95%CI)   |                  | Model 2<br>OR (95%CI)   |                  | Model 3<br>OR (95%CI)   |                         |
|------------------------|-------------------------|------------------|-------------------------|------------------|-------------------------|-------------------------|
|                        | Women                   | Men              | Women                   | Men              | Women                   | Men                     |
| <b>Social cohesion</b> |                         |                  |                         |                  |                         |                         |
| Lowest tertile         | <b>1.38 (1.11-1.71)</b> | 0.99 (0.78-1.26) | <b>1.28 (1.04-1.58)</b> | 0.96 (0.76-1.22) | <b>1.25 (1.01-1.55)</b> | 0.95 (0.75-1.21)        |
| Middle tertile         | 1.11 (0.93-1.32)        | 0.97 (0.80-1.18) | 1.09 (0.92-1.30)        | 0.96 (0.80-1.17) | 1.08 (0.91-1.29)        | 0.97 (0.80-1.17)        |
| Highest tertile        | 1.00                    | 1.00             | 1.00                    | 1.00             | 1.00                    | 1.00                    |
| <b>Age</b>             | <b>1.02 (1.01-1.03)</b> | 1.00 (0.99-1.01) | <b>1.02 (1.01-1.03)</b> | 1.00 (0.99-1.01) | <b>1.02 (1.01-1.03)</b> | 1.00 (0.99-1.01)        |
| <b>Education</b>       |                         |                  |                         |                  |                         |                         |
| Less than primary      |                         |                  | <b>1.96 (1.40-2.75)</b> | 1.33 (0.97-1.84) | <b>1.62 (1.15-2.29)</b> | 1.21 (0.87-1.69)        |
| Primary                |                         |                  | <b>1.70 (1.27-2.27)</b> | 1.10 (0.79-1.50) | <b>1.39 (1.03-1.87)</b> | 1.00 (0.72-1.40)        |
| Secondary              |                         |                  | <b>1.68 (1.46-1.94)</b> | 1.18 (0.99-1.41) | <b>1.47 (1.27-1.71)</b> | 1.10 (0.92-1.33)        |
| University             |                         |                  | 1.00                    | 1.00             | 1.00                    | 1.00                    |
| <b>Skin color</b>      |                         |                  |                         |                  |                         |                         |
| Black                  |                         |                  |                         |                  | <b>1.82 (1.50-2.21)</b> | <b>1.40 (1.08-1.82)</b> |
| Brown                  |                         |                  |                         |                  | <b>1.34 (1.13-1.61)</b> | 1.11 (0.91-1.36)        |
| White                  |                         |                  |                         |                  | 1.00                    | 1.00                    |

**Table 3:** Results from the multilevel logistic regression model predicting obesity (BMI>30 kg/m<sup>2</sup>) by perceived neighborhood safety; gender-stratified (N= 6,104 women; 4,791 men)

|                         | Model 1<br>OR (95%CI)   |                  | Model 2<br>OR (95%CI)   |                  | Model 3<br>OR (95%CI)   |                         |
|-------------------------|-------------------------|------------------|-------------------------|------------------|-------------------------|-------------------------|
|                         | Women                   | Men              | Women                   | Men              | Women                   | Men                     |
| <b>Perceived safety</b> |                         |                  |                         |                  |                         |                         |
| Lowest tertile          | 1.18 (0.96-1.44)        | 1.05 (0.85-1.29) | 1.16 (0.95-1.40)        | 1.04 (0.84-1.29) | 1.15 (0.95-1.40)        | 1.03 (0.83-1.28)        |
| Middle tertile          | 0.96 (0.80-1.15)        | 0.97 (0.80-1.17) | 0.96 (0.81-1.14)        | 0.96 (0.80-1.17) | 0.96 (0.81-1.14)        | 0.97 (0.80-1.17)        |
| Highest tertile         | 1.00                    | 1.00             | 1.00                    | 1.00             | 1.00                    | 1.00                    |
| <b>Age</b>              | <b>1.02 (1.01-1.03)</b> | 1.00 (0.99-1.01) | <b>1.02 (1.01-1.02)</b> | 1.00 (0.99-1.01) | <b>1.02 (1.01-1.03)</b> | 1.00 (1.00-1.01)        |
| <b>Education</b>        |                         |                  |                         |                  |                         |                         |
| Less than primary       |                         |                  | <b>2.00 (1.43-2.80)</b> | 1.33 (0.96-1.83) | <b>1.64 (1.16-2.32)</b> | 1.21 (0.87-1.69)        |
| Primary                 |                         |                  | <b>1.73 (1.29-2.31)</b> | 1.09 (0.79-1.50) | <b>1.40 (1.04-1.89)</b> | 1.00 (0.72-1.39)        |
| Secondary               |                         |                  | <b>1.70 (1.47-1.96)</b> | 1.17 (0.99-1.40) | <b>1.48 (1.28-1.72)</b> | 1.10 (0.91-1.32)        |
| University              |                         |                  | 1.00                    | 1.00             | 1.00                    | 1.00                    |
| <b>Skin color</b>       |                         |                  |                         |                  |                         |                         |
| Black                   |                         |                  |                         |                  | <b>1.83 (1.51-2.23)</b> | <b>1.40 (1.07-1.81)</b> |
| Brown                   |                         |                  |                         |                  | <b>1.36 (1.14-1.62)</b> | 1.11 (0.91-1.36)        |
| White                   |                         |                  |                         |                  | 1.00                    | 1.00                    |



1  
2  
3  
4  
5  
6  
7  
8  
9  
10  
11  
12  
13  
14  
15  
16  
17  
18  
19  
20  
21  
22  
23  
24  
25  
26  
27  
28  
29  
30  
31  
32  
33  
34  
35  
36  
37  
38  
39  
40  
41  
42  
43  
44  
45  
46  
47

**Table 4:** Results from the multilevel logistic regression model predicting obesity (BMI>30 kg/m<sup>2</sup>) by perceived neighborhood violence; gender-stratified (N= 6,104 women; 4,791 men)

|                                       | Model 1<br>OR (95%CI)   |                  | Model 2<br>OR (95%CI)   |                  | Model 3<br>OR (95%CI)   |                         |
|---------------------------------------|-------------------------|------------------|-------------------------|------------------|-------------------------|-------------------------|
|                                       | Women                   | Men              | Women                   | Men              | Women                   | Men                     |
| <b>Perceived violence<sup>1</sup></b> |                         |                  |                         |                  |                         |                         |
| Lowest tertile                        | <b>1.61 (1.31-1.98)</b> | 1.17 (0.94-1.46) | <b>1.41 (1.15-1.73)</b> | 1.12 (0.89-1.40) | <b>1.35 (1.10-1.66)</b> | 1.10 (0.87-1.38)        |
| Middle tertile                        | 1.12 (0.94-1.34)        | 1.02 (0.85-1.24) | 1.06 (0.89-1.26)        | 1.00 (0.83-1.21) | 1.06 (0.89-1.26)        | 1.00 (0.83-1.21)        |
| Highest tertile                       | 1.00                    | 1.00             | 1.00                    | 1.00             | 1.00                    | 1.00                    |
| <b>Age</b>                            | <b>1.02 (1.01-1.03)</b> | 1.00 (1.00-1.01) | <b>1.02 (1.01-1.02)</b> | 1.00 (0.99-1.01) | <b>1.02 (1.01-1.03)</b> | 1.00 (1.00-1.01)        |
| <b>Education</b>                      |                         |                  |                         |                  |                         |                         |
| Less than primary                     |                         |                  | <b>1.91 (1.36-2.68)</b> | 1.30 (0.94-1.80) | <b>1.58 (1.12-2.24)</b> | 1.19 (0.85-1.67)        |
| Primary                               |                         |                  | <b>1.64 (1.23-2.20)</b> | 1.07 (0.77-1.47) | <b>1.35 (1.00-1.82)</b> | 0.98 (0.71-1.37)        |
| Secondary                             |                         |                  | <b>1.64 (1.41-1.89)</b> | 1.16 (0.97-1.38) | <b>1.44 (1.24-1.68)</b> | 1.09 (0.90-1.31)        |
| University                            |                         |                  | 1.00                    | 1.00             | 1.00                    | 1.00                    |
| <b>Skin color</b>                     |                         |                  |                         |                  |                         |                         |
| Black                                 |                         |                  |                         |                  | <b>1.79 (1.47-2.18)</b> | <b>1.39 (1.07-1.80)</b> |
| Brown or <i>preto</i>                 |                         |                  |                         |                  | <b>1.34 (1.12-1.61)</b> | 1.11 (0.90-1.36)        |
| White                                 |                         |                  |                         |                  | 1.00                    | 1.00                    |

<sup>1</sup>The perceived violence scale was constructed so that a higher score indicated a lower perceived violence. Therefore, the *lowest tertile* category represents neighborhoods with the highest perceived violence.

**Table 5:** Results from the multilevel logistic regression model predicting obesity (BMI>30 kg/m<sup>2</sup>) by neighborhood social cohesion, perceived safety, and perceived violence; stratified by neighborhood socioeconomic status (SES) and gender<sup>1</sup>

|                                       | High SES<br>OR (95%CI)  |                  | Intermediate SES<br>OR (95%CI) |                  | Low SES<br>OR (95%CI)   |                  |
|---------------------------------------|-------------------------|------------------|--------------------------------|------------------|-------------------------|------------------|
|                                       | Women                   | Men              | Women                          | Men              | Women                   | Men              |
| <b>Social cohesion</b>                |                         |                  |                                |                  |                         |                  |
| Lowest tertile                        | <b>1.54 (1.14-2.10)</b> | 1.10 (0.79-1.55) | 0.85 (0.57-1.27)               | 0.91 (0.61-1.38) | 1.36 (0.93-2.00)        | 0.95 (0.61-1.49) |
| Middle tertile                        | 1.08 (0.82-1.41)        | 1.05 (0.78-1.41) | 1.05 (0.76-1.43)               | 0.80 (0.56-1.14) | 1.00 (0.72-1.38)        | 0.87 (0.58-1.29) |
| Highest tertile                       | 1.00                    | 1.00             | 1.00                           | 1.00             | 1.00                    | 1.00             |
| <b>Perceived safety</b>               |                         |                  |                                |                  |                         |                  |
| Lowest tertile                        | 1.03 (0.75-1.40)        | 1.00 (0.72-1.38) | 0.87 (0.60-1.26)               | 0.94 (0.62-1.42) | 1.30 (0.90-1.89)        | 1.12 (0.73-1.72) |
| Middle tertile                        | 0.97 (0.73-1.30)        | 0.86 (0.64-1.17) | 0.87 (0.63-1.20)               | 0.91 (0.63-1.30) | 1.24 (0.90-1.70)        | 0.94 (0.64-1.39) |
| Highest tertile                       | 1.00                    | 1.00             | 1.00                           | 1.00             | 1.00                    | 1.00             |
| <b>Perceived violence<sup>2</sup></b> |                         |                  |                                |                  |                         |                  |
| Lowest tertile                        | 1.14 (0.83-1.56)        | 1.18 (0.82-1.68) | 1.23 (0.84-1.81)               | 1.07 (0.71-1.63) | <b>1.73 (1.15-2.59)</b> | 1.05 (0.66-1.68) |
| Middle tertile                        | 0.92 (0.70-1.21)        | 1.07 (0.80-1.44) | 1.00 (0.71-1.41)               | 0.86 (0.59-1.26) | <b>1.61 (1.14-2.26)</b> | 1.03 (0.70-1.51) |
| Highest tertile                       | 1.00                    | 1.00             | 1.00                           | 1.00             | 1.00                    | 1.00             |

<sup>1</sup>Adjusted by age, education, and skin color

<sup>2</sup>The perceived violence scale was constructed so that a higher score indicated a lower perceived violence. Therefore, the *lowest tertile* category represents neighborhoods with the highest perceived violence.

## DISCUSSION

In this study based on a civil-servant sample of adults living in six large cities in Brazil, we found that living in a neighborhood with low social cohesion and high levels of self-perceived violence was associated with higher odds of obesity among women but not men. After stratifying by neighborhood SES, the association between living in the least socially cohesive neighborhoods and obesity remained only among women living in high SES neighborhoods, whereas the association between living in the most violent neighborhoods and obesity remained only for women residing in low SES neighborhoods.

Studies in Latin America<sup>13,14</sup> and elsewhere<sup>25</sup> also report an association between neighborhood violence and obesity among adults. The hypothesized mechanisms involved are a reduction in outdoor physical activity, related to the fear of being outdoors, as well as the direct stress caused by living in an unsafe neighborhood. There is support for both hypotheses in the literature, as neighborhood crime/violence is associated with a decreased physical activity,<sup>15,17,25</sup> and also with an increase in stress and a worse mental health.<sup>26,27</sup> Chronic stress, in turn, has been linked to an increased obesity risk due to its influence on weight-related behaviors and by dysregulating the hypothalamic-pituitary-adrenal axis, leading to abdominal fat deposition.<sup>28</sup>

There are mixed results in relation to neighborhood social cohesion and obesity in high-income countries<sup>29-31</sup> and, as far as the authors know, no previous studies have looked at this association in Latin America. Similar to our findings, Cohen et al. (2006) found that residents of neighborhoods with lower collective efficacy – a concept highly linked to social cohesion – had higher BMIs in Los Angeles, CA, U.S.<sup>29</sup> Burdette et al. (2006), in turn, found no such association among women living in 20 U.S. cities.<sup>30</sup> Social cohesion is hypothesized to act as a buffer from neighborhood-related stress and, through this mechanism, be protective of obesity.

1  
2  
3 Cohen et al. (2006) also suggest that adults in neighborhoods with higher social cohesion may be  
4 willing to intervene in aspects of the neighborhood that influence weight-related behaviors; for  
5  
6  
7  
8  
9  
10  
11  
12  
13  
14  
15  
16  
17  
18  
19  
20  
21  
22  
23  
24  
25  
26  
27  
28  
29  
30  
31  
32  
33  
34  
35  
36  
37  
38  
39  
40  
41  
42  
43  
44  
45  
46  
47  
48  
49  
50  
51  
52  
53  
54  
55  
56  
57  
58  
59  
60

Cohen et al. (2006) also suggest that adults in neighborhoods with higher social cohesion may be willing to intervene in aspects of the neighborhood that influence weight-related behaviors; for example, setting up sports leagues or influencing local food stores to carry healthier offerings.<sup>29</sup>

We found that the neighborhood social environment only influences obesity risk among Brazilian women and not men. This finding that women are more affected by their neighborhood environment, particularly the social one, is not new.<sup>32-34</sup> Rech et al. 2012 found that perception of safety during the day was associated with leisure walking among women but not men among a convenience sample of adults in Curitiba, Brazil.<sup>15</sup> Similarly, a study in Los Angeles, CA, U.S. found that women living in high-poverty neighborhoods exercised less than men, partly due to safety concerns associated with accessing outdoor parks.<sup>33</sup> Moreover, Guilcher et al. (2017) found that a higher neighborhood social cohesion was associated with lower odds of obesity only among women in a sample of adults in Toronto, Canada.<sup>31</sup> Reasons why neighborhood effects may be stronger for women than men include differences in their neighborhood perceptions, an increased exposure (i.e. women spending more time in their residential neighborhoods), or an increased vulnerability (i.e. women being more impacted by their surroundings).<sup>32</sup> Further, women are more often victims of sexual violence than men,<sup>3,25</sup> and this may influence the time they spend outdoors – and hence their physical activity levels – as well as their stress levels.

Finally, we found that the effect of social cohesion and perceived violence on obesity among women varied by neighborhood SES. Two studies of the neighborhood social environments in Brazil have found differential effects of these neighborhood variables on physical activity by *individual*-level SES. Andrade et al. (2015) reports a positive association between social cohesion and physical activity only among low-SES individuals in Belo Horizonte, Brazil.<sup>18</sup> This contradicts our findings that a lower social cohesion was associated

1  
2  
3 with a higher obesity risk among women living in high-SES neighborhoods. In turn, Rech et al.  
4  
5 (2012) found that negative associations between safety perceptions and physical inactivity in  
6  
7 Curitiba, Brazil were only present among high-SES individuals.<sup>15</sup> We found that perceived  
8  
9 neighborhood violence increased obesity risk among women in low-SES neighborhoods only.  
10  
11 Future studies should investigate the interactions between individual-and neighborhood-level  
12  
13 SES in the effects of social environments on obesity.  
14  
15

16  
17  
18 Our results suggest that neighborhood interventions to increase social cohesion and  
19  
20 decrease violence perceptions may prevent obesity among women in Brazil. Effective  
21  
22 neighborhood interventions designed to reduce violence may include the cleaning and greening  
23  
24 of vacant lots, as well as the reduction of alcohol availability.<sup>35</sup> The greening of vacant lots may  
25  
26 also work at increasing social cohesion and social interactions, based on evidence available from  
27  
28 public gardening research.<sup>36</sup> Increasing access to safe public spaces may also help increase social  
29  
30 cohesion and thus decrease obesity risk. Salvo et al.,<sup>37</sup> for example, found that residents of  
31  
32 Bogota, Colombia and Cuernavaca, Mexico reported shopping malls and nightclubs as places  
33  
34 where they engaged in physical activity with friends, highlighting that public places that allow  
35  
36 for social interactions may be important for weight-related behaviors. Another option to  
37  
38 potentially increase neighborhood trust and thus social cohesion while reducing crime is  
39  
40 instituting neighborhood watches.<sup>38</sup> It can be argued, however, that participating in neighborhood  
41  
42 watches may increase crime awareness and, thus, have a counteractive effect.<sup>39</sup>  
43  
44  
45  
46  
47  
48  
49

### 50 **Strengths and limitations**

51  
52 This study is based on civil-servants in six large cities in Brazil; therefore, our sample excludes  
53  
54 the extremely poor and unemployed and so our results may only be generalizable to Brazilian  
55  
56  
57  
58  
59  
60

1  
2  
3 adults with stable employment. However, the ELSA-Brasil sample is diverse in terms of  
4  
5 sociodemographic characteristics, including diverse regions within Brazil. Moreover, data  
6  
7 collection was based on validated questionnaires and scales, as well as direct body measurements  
8  
9 which allowed us to estimate obesity based on measured weight and height as opposed to self-  
10  
11 reports. The neighborhood social environment variables, however, are all self-reported and we  
12  
13 did not have access to objective measures of crime/violence in the neighborhood. Another  
14  
15 limitation includes the cross-sectional design, which prevents us from establishing the  
16  
17 directionality of the associations. However, the ELSA-Brasil population is highly stable in terms  
18  
19 of neighborhood residence, with an average of 15-year length of residence in their current  
20  
21 neighborhood.  
22  
23  
24  
25  
26  
27  
28

## 29 **CONCLUSIONS**

30  
31  
32 To our knowledge, this is one of the few studies in Latin America examining the association  
33  
34 between the neighborhood social environment and obesity, providing key insights into the  
35  
36 likelihood of success of neighborhood-level interventions addressing obesity in the Brazilian  
37  
38 context, in particular. Our results suggest that an increase in neighborhood social cohesion and a  
39  
40 reduction in the perception of neighborhood violence may be protective of obesity among  
41  
42 Brazilian women, with the latter particularly true for women living in poverty. Further research  
43  
44 is needed to test some of the proposed interventions in Brazil and other Latin American  
45  
46 countries, with an aim to strengthen existing communities while improving the public's health.  
47  
48 Future research should also clarify the reasons why the neighborhood social environment in both  
49  
50 high and low- and middle-income countries seem to affect women more than men.  
51  
52  
53  
54  
55  
56  
57  
58  
59  
60

## ACKNOWLEDGEMENTS

We thank all ELSA-Brasil participants for their invaluable contribution to this study.

## DATA SHARING

The data used in this study are available for research proposals on request to the ELSA's Datacenter and to the ELSA's Publications Committee (publiELSA). Additional information can be obtained from the ELSA's Datacenter ([estatisticaelsa@ufrgs.br](mailto:estatisticaelsa@ufrgs.br)) and from the ELSA Coordinator from the Research Center of Rio de Janeiro ([rohgriep@ioc.fiocruz.br](mailto:rohgriep@ioc.fiocruz.br)).

## DISCLOSURE

The authors declared no conflict of interest.

## FUNDING

This study was funded by the Brazilian Ministry of Health (Department of Science and Technology) and the Brazilian Ministry of Science, Technology and Innovation (FINEP, Financiadora de Estudos e Projetos and CNPq, National Research Council), Grant No 01 06 0010.00, 01 06 0212.00, 01 06 0300.00, 01 06 0278.00, 01 06 0115.00 and 01 06 0071.00. DC, LG, RHG, SMB, and SMAM are research fellows of the National Research Council (CNPq). DC, LOC, and RHG are supported by a research grant (*Cientistas do Nosso Estado*) from the *Fundação de Amparo à Pesquisa do Estado do Rio de Janeiro - FAPERJ*, Brazil. MPC received a COR Research Fellowship from the Tulane University Senate Committee on Research and the Tulane Provost's Office, which funded her travels to Brazil.

**REFERENCES**

1. Diez-Roux AV, Mair C. Neighborhoods and health. *Ann NY Acad Sci* 2010;1186(1):125-145.
2. Gee GC, Payne-Sturges DC. Environmental health disparities: a framework integrating psychosocial and environmental concepts. *Environ Health Perspect* 2004;112(17):1645-1653.
3. Suglia SF, Shelton RC, Hsiao A, Wang YC, Rundle A, Link BG. Why the neighborhood social environment is critical in obesity prevention. *J Urban Health* 2016;93(1):206-212.
4. Lovasi GS, Hutson MA, Guerra M, Neckerman KM. Built environments and obesity in disadvantaged populations. *Epidemiol Rev* 2009;31(1):7-20.
5. Kline L, Jones-Smith J, Miranda JJ, et al. A research agenda to guide progress on childhood obesity prevention in Latin America. *Obes Rev* 2017;18(S2):19-27.
6. Rivera JÁ, de Cossío TG, Pedraza LS, Aburto TC, Sánchez TG, Martorell R. Childhood and adolescent overweight and obesity in Latin America: a systematic review. *Lancet Diab Endocrinol* 2014;2(4):321-332.
7. Pérez-Escamilla R, Lutter CK, Rabadan-Diehl C, et al. Prevention of childhood obesity and food policies in Latin America: from research to practice. *Obes Rev* 2017;18(S2):28-38.
8. Molina M, Serván-Mori E, Quezada AD, Colchero MA. Is there a link between availability of food and beverage establishments and BMI in Mexican adults? *Public Health Nutr* 2017;20(18):3326-3332.
9. Chor D, Cardoso LO, Nobre AA, et al. Association between perceived neighbourhood characteristics, physical activity and diet quality: results of the Brazilian Longitudinal Study of Adult Health (ELSA-Brasil). *BMC Public Health*. 2016;16:751.



10. Hino AAF, Rech CR, Gonçalves PB, Reis R. Perceived neighborhood environment and leisure time physical activity among adults from Curitiba, Brazil. *Rev Bras Cineantropom Desempenho Hum* 2017;19:596-607.
11. Mendonça G, Florindo AA, Rech CR, de Freitas DKS, de Farias Júnior JC. Perceived neighborhood environmental characteristics and different types of physical activity among Brazilian adolescents. *J Sport Sci* 2018;36(9):1068-1075.
12. Gómez LF, Parra DC, Buchner D, et al. Built environment attributes and walking patterns among the elderly population in Bogota. *Am J Prev Med.* 2010;38(6):592-599.
13. Martinez L, Prada S, Estrada D. Homicides, public goods, and population health in the context of high urban violence rates in Cali, Colombia. *J Urban Health* 2018;95:391-400.
14. Mendes LL, Nogueira H, Padez C, Ferrao M, Velasquez-Melendez G. Individual and environmental factors associated for overweight in urban population of Brazil. *BMC Public Health* 2013;13:988-988.
15. Rech CR, Reis RS, Hino AAF, et al. Neighborhood safety and physical inactivity in adults from Curitiba, Brazil. *Int J Behav Nutr Phys Act.* 2012;9(1):72.
16. Florindo AA, Salvador EP, Reis RS, Guimarães VV. Perception of the environment and practice of physical activity by adults in a low socioeconomic area. *Rev Saude Publica* 2011;45:302-310.
17. Weber Corseuil M, Hallal PC, Xavier Corseuil H, Jayce Ceola Schneider I, d'Orsi E. Safety from crime and physical activity among older adults: a population-based study in Brazil. *J Environ Public Health* 2012;2012:7.

- 1  
2  
3 18. Andrade ACdS, Peixoto SV, Friche AAdL, et al. Social context of neighborhood and  
4 socioeconomic status on leisure-time physical activity in a Brazilian urban center: The  
5 BH Health Study. *Cad Saude Publica* 2015;31:136-147.  
6  
7
- 8  
9  
10 19. Aquino EM, Barreto SM, Bensenor IM, et al. Brazilian Longitudinal Study of Adult  
11 Health (ELSA-Brasil): objectives and design. *Am J Epidemiol* 2012;175(4):315-324.  
12  
13
- 14 20. Santos SM, Chor D, Loureiro Werneck G. Demarcation of local neighborhoods to study  
15 relations between contextual factors and health. *Int J Health Geo.* 2010;9:34.  
16  
17
- 18 21. Instituto Brasileiro de Geografia e Estatística (IBGE). 2010 Population Census. n.d.;  
19 <https://ww2.ibge.gov.br/english/estatistica/populacao/censo2010/default.shtm>. Accessed  
20 Aug 3, 2017.  
21  
22
- 23 22. Sampson RJ, Raudenbush SW, Earls F. Neighborhoods and violent crime: A multilevel  
24 study of collective efficacy. *Science* 1997;277:918-924.  
25  
26
- 27 23. Mujahid MS, Diez-Roux A, Morenoff JD, Raghunathan T. Assessing the measurement  
28 properties of neighborhood scales: from psychometrics to econometrics. *Am J Epidemiol*  
29 2007;165:858-867.  
30  
31
- 32 24. Santos SM, Griep RH, Cardoso LO, et al. Cross-cultural adaptation and reliability of  
33 measurements on self-reported neighborhood characteristics in ELSA-Brasil. *Rev Saude*  
34 *Publica.* 2013;47 Suppl 2:122-130.  
35  
36
- 37 25. Yu E, Lippert Adam M. Neighborhood crime rate, weight-related behaviors, and  
38 obesity: a systematic review of the literature. *Sociol Compass* 2016;10(3):187-207.  
39  
40
- 41 26. Stockdale SE, Wells KB, Tang L, Belin TR, Zhang L, Sherbourne CD. The importance of  
42 social context: Neighborhood stressors, stress-buffering mechanisms, and alcohol, drug,  
43 and mental health disorders. *Soc Sci Med* 2007;65(9):1867-1881.  
44  
45  
46  
47  
48  
49  
50  
51  
52  
53  
54  
55  
56  
57  
58  
59  
60

- 1  
2  
3 27. Stafford M, Chandola T, Marmot M. Association between fear of crime and mental  
4 health and physical functioning. *Am J Public Health* 2007;97(11):2076-2081.  
5  
6  
7 28. Björntorp P. Do stress reactions cause abdominal obesity and comorbidities? *Obes Rev*  
8 2001;2(2):73-86.  
9  
10  
11 29. Cohen DA, Finch BK, Bower A, Sastry N. Collective efficacy and obesity: The potential  
12 influence of social factors on health. *Soc Sci Med* 2006;62(3):769-778.  
13  
14  
15 30. Burdette HL, Wadden TA, Whitaker RC. Neighborhood safety, collective efficacy, and  
16 obesity in women with young children. *Obesity* 2006;14(3):518-525.  
17  
18  
19 31. Guilcher SJT, Kaufman-Shriqui V, Hwang J, et al. The association between social  
20 cohesion in the neighborhood and body mass index (BMI): An examination of gendered  
21 differences among urban-dwelling Canadians. *Prev Med*. 2017;99:293-298.  
22  
23  
24 32. Stafford M, Cummins S, Macintyre S, Ellaway A, Marmot M. Gender differences in the  
25 associations between health and neighbourhood environment. *Soc Sci Med*  
26 2005;60(8):1681-1692.  
27  
28  
29 33. Derosé KP, Han B, Williamson S, Cohen DA. Gender disparities in park use and physical  
30 activity among residents of high-poverty neighborhoods in Los Angeles. *Women Health*  
31 *Issues* 2018;28(1):6-13.  
32  
33  
34 34. Astell-Burt T, Feng X, Kolt GS, Jalaludin B. Does rising crime lead to increasing  
35 distress? Longitudinal analysis of a natural experiment with dynamic objective  
36 neighbourhood measures. *Soc Sci Med* 2015;138:68-73.  
37  
38  
39 35. Kondo MC, Andreyeva E, South EC, MacDonald JM, Branas CC. Neighborhood  
40 interventions to reduce violence. *Ann Rev Public Health* 2018;39(1):253-271.  
41  
42  
43  
44  
45  
46  
47  
48  
49  
50  
51  
52  
53  
54  
55  
56  
57  
58  
59  
60

- 1  
2  
3 36. Armstrong D. A survey of community gardens in upstate New York: Implications for  
4 health promotion and community development. *Health Place* 2000;6(4):319-327.  
5  
6  
7 37. Salvo D, Sarmiento OL, Reis RS, et al. Where Latin Americans are physically active, and  
8 why does it matter? Findings from the IPEN-adult study in Bogota, Colombia;  
9 Cuernavaca, Mexico; and Curitiba, Brazil. *Prev Med*. 2017;103:S27-S33.  
10  
11  
12 38. Bennett T, Holloway K, Farrington DP. Does neighborhood watch reduce crime? A  
13 systematic review and meta-analysis. *J Exp Criminol* 2006;2(4):437-458.  
14  
15  
16 39. Lorenc T, Clayton S, Neary D, et al. Crime, fear of crime, environment, and mental  
17 health and wellbeing: Mapping review of theories and causal pathways. *Health Place*  
18 2012;18(4):757-765.  
19  
20  
21  
22  
23  
24  
25  
26  
27  
28  
29  
30  
31  
32  
33  
34  
35  
36  
37  
38  
39  
40  
41  
42  
43  
44  
45  
46  
47  
48  
49  
50  
51  
52  
53  
54  
55  
56  
57  
58  
59  
60

STROBE Statement—Checklist of items that should be included in reports of *cross-sectional studies*

|                           | Item No | Page No | Recommendation                                                                                                                                                                                                                                                                                                                                                                                                                             |
|---------------------------|---------|---------|--------------------------------------------------------------------------------------------------------------------------------------------------------------------------------------------------------------------------------------------------------------------------------------------------------------------------------------------------------------------------------------------------------------------------------------------|
| <b>Title and abstract</b> | 1       | 1       | (a) Indicate the study's design with a commonly used term in the title or the abstract<br><i>The term "a multilevel study" is included in the title</i>                                                                                                                                                                                                                                                                                    |
|                           |         | 2       | (b) Provide in the abstract an informative and balanced summary of what was done and what was found                                                                                                                                                                                                                                                                                                                                        |
| <b>Introduction</b>       |         |         |                                                                                                                                                                                                                                                                                                                                                                                                                                            |
| Background/rationale      | 2       | 5       | Explain the scientific background and rationale for the investigation being reported                                                                                                                                                                                                                                                                                                                                                       |
| Objectives                | 3       | 6       | State specific objectives, including any prespecified hypotheses<br><i>Our study was exploratory, so objectives are included but no prespecified hypotheses.</i>                                                                                                                                                                                                                                                                           |
| <b>Methods</b>            |         |         |                                                                                                                                                                                                                                                                                                                                                                                                                                            |
| Study design              | 4       | 6       | Present key elements of study design early in the paper                                                                                                                                                                                                                                                                                                                                                                                    |
| Setting                   | 5       | 6       | Describe the setting, locations, and relevant dates, including periods of recruitment, exposure, follow-up, and data collection                                                                                                                                                                                                                                                                                                            |
| Participants              | 6       | 6       | (a) Give the eligibility criteria, and the sources and methods of selection of participants                                                                                                                                                                                                                                                                                                                                                |
| Variables                 | 7       | 7-9     | Clearly define all outcomes, exposures, predictors, potential confounders, and effect modifiers. Give diagnostic criteria, if applicable                                                                                                                                                                                                                                                                                                   |
| Data sources/measurement  | 8*      | 7-9     | For each variable of interest, give sources of data and details of methods of assessment (measurement). Describe comparability of assessment methods if there is more than one group                                                                                                                                                                                                                                                       |
| Bias                      | 9       | 9       | Describe any efforts to address potential sources of bias<br><i>Explained covariate adjustment to control for confounding</i>                                                                                                                                                                                                                                                                                                              |
|                           | 10      | 7       | Explain how the study size was arrived at                                                                                                                                                                                                                                                                                                                                                                                                  |
| Quantitative variables    | 11      | 7-9     | Explain how quantitative variables were handled in the analyses. If applicable, describe which groupings were chosen and why                                                                                                                                                                                                                                                                                                               |
| Statistical methods       | 12      | 10      | (a) Describe all statistical methods, including those used to control for confounding<br>(b) Describe any methods used to examine subgroups and interactions<br>(c) Explain how missing data were addressed<br>(d) If applicable, describe analytical methods taking account of sampling strategy<br>(e) Describe any sensitivity analyses<br><i>No sensitivity analyses done</i>                                                          |
| <b>Results</b>            |         |         |                                                                                                                                                                                                                                                                                                                                                                                                                                            |
| Participants              | 13*     | 6-7     | (a) Report numbers of individuals at each stage of study—eg numbers potentially eligible, examined for eligibility, confirmed eligible, included in the study, completing follow-up, and analysed<br>(b) Give reasons for non-participation at each stage<br>(c) Consider use of a flow diagram<br><i>Authors consider this unnecessary as data collection has been explained in previous publications at length (cited in this paper)</i> |
| Descriptive data          | 14*     | 10,12   | (a) Give characteristics of study participants (eg demographic, clinical,                                                                                                                                                                                                                                                                                                                                                                  |

|                          |     |       |                                                                                                                                                                                                                                                                                                                                                                                                                                        |
|--------------------------|-----|-------|----------------------------------------------------------------------------------------------------------------------------------------------------------------------------------------------------------------------------------------------------------------------------------------------------------------------------------------------------------------------------------------------------------------------------------------|
|                          |     |       | social) and information on exposures and potential confounders                                                                                                                                                                                                                                                                                                                                                                         |
|                          |     |       | (b) Indicate number of participants with missing data for each variable of interest                                                                                                                                                                                                                                                                                                                                                    |
|                          |     |       | <i>Complete data analysis only</i>                                                                                                                                                                                                                                                                                                                                                                                                     |
| Outcome data             | 15* | 10,12 | Report numbers of outcome events or summary measures                                                                                                                                                                                                                                                                                                                                                                                   |
| Main results             | 16  | 13-16 | (a) Give unadjusted estimates and, if applicable, confounder-adjusted estimates and their precision (eg, 95% confidence interval). Make clear which confounders were adjusted for and why they were included<br>(b) Report category boundaries when continuous variables were categorized<br>(c) If relevant, consider translating estimates of relative risk into absolute risk for a meaningful time period<br><i>Not applicable</i> |
| Other analyses           | 17  | 11,16 | Report other analyses done—eg analyses of subgroups and interactions, and sensitivity analyses<br><i>Subgroups analyses are explained; no sensitivity analyses reported</i>                                                                                                                                                                                                                                                            |
| <b>Discussion</b>        |     |       |                                                                                                                                                                                                                                                                                                                                                                                                                                        |
| Key results              | 18  | 17    | Summarise key results with reference to study objectives                                                                                                                                                                                                                                                                                                                                                                               |
| Limitations              | 19  | 19-20 | Discuss limitations of the study, taking into account sources of potential bias or imprecision. Discuss both direction and magnitude of any potential bias                                                                                                                                                                                                                                                                             |
| Interpretation           | 20  | 20    | Give a cautious overall interpretation of results considering objectives, limitations, multiplicity of analyses, results from similar studies, and other relevant evidence                                                                                                                                                                                                                                                             |
| Generalisability         | 21  | 19-20 | Discuss the generalisability (external validity) of the study results                                                                                                                                                                                                                                                                                                                                                                  |
| <b>Other information</b> |     |       |                                                                                                                                                                                                                                                                                                                                                                                                                                        |
| Funding                  | 22  | 21    | Give the source of funding and the role of the funders for the present study and, if applicable, for the original study on which the present article is based                                                                                                                                                                                                                                                                          |

\*Give information separately for exposed and unexposed groups.

**Note:** An Explanation and Elaboration article discusses each checklist item and gives methodological background and published examples of transparent reporting. The STROBE checklist is best used in conjunction with this article (freely available on the Web sites of PLoS Medicine at <http://www.plosmedicine.org/>, Annals of Internal Medicine at <http://www.annals.org/>, and Epidemiology at <http://www.epidem.com/>). Information on the STROBE Initiative is available at [www.strobe-statement.org](http://www.strobe-statement.org).

# BMJ Open

## The association between the neighborhood social environment and obesity in Brazil varies by gender and neighborhood socioeconomic status: a cross-sectional analysis of the ELSA-Brasil study

|                                 |                                                                                                                                                                                                                                                                                                                                                                                                                                                                                                                                                                                                                                                                                                                                                                                                                                                                                                                                                                                                                         |
|---------------------------------|-------------------------------------------------------------------------------------------------------------------------------------------------------------------------------------------------------------------------------------------------------------------------------------------------------------------------------------------------------------------------------------------------------------------------------------------------------------------------------------------------------------------------------------------------------------------------------------------------------------------------------------------------------------------------------------------------------------------------------------------------------------------------------------------------------------------------------------------------------------------------------------------------------------------------------------------------------------------------------------------------------------------------|
| Journal:                        | <i>BMJ Open</i>                                                                                                                                                                                                                                                                                                                                                                                                                                                                                                                                                                                                                                                                                                                                                                                                                                                                                                                                                                                                         |
| Manuscript ID                   | bmjopen-2018-026800.R1                                                                                                                                                                                                                                                                                                                                                                                                                                                                                                                                                                                                                                                                                                                                                                                                                                                                                                                                                                                                  |
| Article Type:                   | Research                                                                                                                                                                                                                                                                                                                                                                                                                                                                                                                                                                                                                                                                                                                                                                                                                                                                                                                                                                                                                |
| Date Submitted by the Author:   | 06-Mar-2019                                                                                                                                                                                                                                                                                                                                                                                                                                                                                                                                                                                                                                                                                                                                                                                                                                                                                                                                                                                                             |
| Complete List of Authors:       | Chaparro, M. Pia; Tulane University School of Public Health and Tropical Medicine, Global Community Health and Behavioral Sciences<br>Pina, Maria; Fundacao Oswaldo Cruz, Laboratory of Health and Environment Education; INEB - Instituto de Engenharia Biomédica, Universidade do Porto<br>Cardoso, Leticia; Fundação Oswaldo Cruz., National School of Public Health Sergio Arouca<br>Santos, Simone; Fundação Oswaldo Cruz., National School of Public Health Sergio Arouca<br>Barreto, Sandhi; Hospital das Clinicas da Universidade Federal de Minas Gerais<br>Giatti, Luana; Universidade Federal da Ouro Preto, School of Nutrition<br>Matos, Sheila Maria; Universidade Federal da Bahia, Institute of Public Health<br>Mendes da Fonseca, Maria ; Fundacao Oswaldo Cruz, National School of Public Health Sergio Arouca<br>Chor, Dora; Oswaldo Cruz Foundation-National School of Public Health, Epidemiology<br>Griep, Rosane Haerter; Fundacao Oswaldo Cruz, Laboratory of Health and Environment Education |
| <b>Primary Subject Heading</b>: | Global health                                                                                                                                                                                                                                                                                                                                                                                                                                                                                                                                                                                                                                                                                                                                                                                                                                                                                                                                                                                                           |
| Secondary Subject Heading:      | Nutrition and metabolism                                                                                                                                                                                                                                                                                                                                                                                                                                                                                                                                                                                                                                                                                                                                                                                                                                                                                                                                                                                                |
| Keywords:                       | obesity, neighborhood, Brazil, social environment                                                                                                                                                                                                                                                                                                                                                                                                                                                                                                                                                                                                                                                                                                                                                                                                                                                                                                                                                                       |
|                                 |                                                                                                                                                                                                                                                                                                                                                                                                                                                                                                                                                                                                                                                                                                                                                                                                                                                                                                                                                                                                                         |

SCHOLARONE™  
Manuscripts

1  
2  
3 **The association between the neighborhood social environment and obesity in Brazil varies**  
4 **by gender and neighborhood socioeconomic status: a cross-sectional analysis of the ELSA-**  
5 **Brasil study**  
6  
7  
8  
9

10  
11  
12 M. Pia Chaparro,<sup>1</sup> M. Fatima Pina,<sup>2-4</sup> Leticia de Oliveira Cardoso,<sup>5</sup> Simone M. Santos,<sup>5</sup> Sandhi  
13  
14 Maria Barreto,<sup>6</sup> Luana Giatti Gonçalves,<sup>7</sup> Sheila M. Alvim de Matos,<sup>8</sup> Maria de Jesus Mendes da  
15  
16 Fonseca,<sup>5</sup> Dóra Chor,<sup>5</sup> Rosane H. Griep<sup>2</sup>  
17  
18  
19  
20

21 <sup>1</sup>Department of Global Community Health and Behavioral Sciences, School of Public Health and  
22  
23 Tropical Medicine, Tulane University, New Orleans, LA, USA.  
24  
25

26 <sup>2</sup>Laboratory of Health and Environment Education, Oswaldo Cruz Institute, Fundação Oswaldo  
27  
28 Cruz, Manguinhos, Rio de Janeiro, Brazil.  
29  
30

31 <sup>3</sup>Institute of Biomedical Engineering (INEB), University of Porto, Porto, Portugal.  
32

33 <sup>4</sup>Institute of Research and Innovation in Health (i3s), University of Porto, Porto, Portugal.  
34

35 <sup>5</sup>National School of Public Health Sergio Arouca, Fundação Oswaldo Cruz, Rio de Janeiro,  
36  
37 Brazil.  
38  
39

40 <sup>6</sup>Medical School & Hospital das Clínicas, Federal University of Minas Gerais, Belo Horizonte,  
41  
42 Minas Gerais, Brazil.  
43  
44

45 <sup>7</sup>School of Nutrition, Federal University of Ouro Preto, Ouro Preto, Minas Gerais, Brazil.  
46

47 <sup>8</sup>Institute of Public Health, Federal University of Bahia, Salvador, Brazil.  
48  
49  
50  
51  
52  
53  
54  
55  
56  
57  
58  
59  
60



1  
2  
3 **Corresponding author:** M. Pia Chaparro, MS, PhD (corresponding author)  
4  
5 Department of Global Community Health and Behavioral Sciences  
6  
7 School of Public Health and Tropical Medicine  
8  
9 Tulane University  
10  
11 1440 Canal St., suite 2200-16, mail code #8319  
12  
13 New Orleans, LA 70112  
14  
15 Tel. (504) 988-4533  
16  
17 Email: [pchaparro@tulane.edu](mailto:pchaparro@tulane.edu)  
18  
19  
20  
21  
22  
23  
24

25 **Word count:** 2938  
26

27 **Contributorship statement:** MFP, LOC, SMS, SMB, LGG, SMAM, MJMF, DC and RHG  
28  
29 were involved with data acquisition; MPC and MFP were in charge of data analysis with  
30  
31 guidance from LOC, SMS, DC, and RHG; all authors were involved in data interpretation; MPC  
32  
33 drafted the manuscript; all authors edited the manuscript and approved the final version for  
34  
35 submission. All authors take responsibility for the contents of this manuscript and agree to be  
36  
37 accountable for all aspects of the work.  
38  
39  
40  
41  
42  
43  
44  
45  
46  
47  
48  
49  
50  
51  
52  
53  
54  
55  
56  
57  
58  
59  
60

**ABSTRACT**

*Objective:* To investigate the association between the neighborhood social environment, including social cohesion, perceived neighborhood safety, perceived neighborhood violence, and obesity in Brazil.

*Design:* Cross-sectional study.

*Setting:* 6 state capitals in Brazil (Salvador, Vitoria, Belo Horizonte, Porto Alegre, Sao Paulo, and Rio de Janeiro)

*Participants:* Current or former employees of 5 federal universities and 1 research center in each of the 6 Brazilian state capitals who were participants of the baseline wave (2008-2010) of the Brazilian Longitudinal Study of Adult Health (N=11,456; 56% women; 56% White, 28% Brown, and 16% Black).

*Primary outcome measure:* Obesity, based on measured weight and height, and defined as having a body mass index (BMI)  $\geq 30\text{kg/m}^2$ .

*Results:* No associations were found between the neighborhood social environment and obesity among men. In multilevel logistic regression models adjusted for age, education, skin color, and individual-level social cohesion and perceived violence scores, respectively, women living in the least socially cohesive neighborhoods and in those perceived as most violent had higher odds of obesity compared to their counterparts (OR=1.26, 95%CI=1.00-1.58; OR=1.27, 95%CI=1.01-1.59, respectively). When stratified by neighborhood SES – defined based on number of people per household, proportion of children 0-4 years, median income, and percent of white residents at the neighborhood level – results for social cohesion and for violence remained only for women residing in high SES and low SES neighborhoods, respectively.

1  
2  
3 *Conclusions:* In this civil-servant sample in 6 large cities in Brazil, the neighborhood social  
4 environment was associated with obesity among women, but not men. Neighborhood-level  
5 interventions to increase social cohesion and reduce violence may help in the prevention of  
6 obesity among women in Brazil.  
7  
8  
9  
10  
11  
12  
13  
14  
15  
16  
17  
18  
19  
20  
21  
22  
23  
24  
25  
26  
27  
28  
29  
30  
31  
32  
33  
34  
35  
36  
37  
38  
39  
40  
41  
42  
43  
44  
45  
46  
47  
48  
49  
50  
51  
52  
53  
54  
55  
56  
57  
58  
59  
60

For peer review only

### STRENGTHS AND LIMITATIONS OF THE STUDY

- This is one of the first studies investigating the association between the neighborhood social environment and obesity in Latin America
- The sample comes from a well-defined cohort study in six large and diverse cities in Brazil, using validated questionnaires and scales, as well as measured weight and height
- This study is based on civil-servants, which excludes the extremely poor and unemployed, limiting generalizability

## INTRODUCTION

Research on neighborhoods and their influence on obesity focus on the physical environment, including the food and physical activity environments, as well as the social environment,<sup>1,2</sup> which refers to the social interactions (or lack thereof) that occur in the neighborhood between neighbors. The social environment includes concepts like social cohesion and social ties, as well as exposure to crime and violence, all of which have been linked to obesity.<sup>3,4</sup> Neighborhood social cohesion is hypothesized work as a buffer for stress and, as such, be protective of obesity,<sup>5</sup> whereas neighborhood crime and violence may affect the likelihood of outdoor physical activity<sup>6-8</sup> and, through this mechanism, be detrimental for obesity. Given the hypothesized link between neighborhoods and obesity, neighborhood-level interventions may be effective ways of influencing individual weight-related behaviors and thus preventing obesity.<sup>9</sup>

To date most evidence linking neighborhoods and obesity come from high-income countries, with still a limited amount of evidence available for low- and middle-income countries like those in Latin America.<sup>10</sup> This is despite the exponential increase in obesity observed in the region in the past two decades, and the widespread search for effective ways to curb the epidemic.<sup>11,12</sup> In Brazil, for example, obesity among women has increased from 12.1% in 2006 to 19.6% in 2016, and for men the corresponding numbers are 11.4% and 18.1%.<sup>13</sup> Research in Latin America has mostly focused on the food and physical activity environments,<sup>14-18</sup> with fewer studies assessing the neighborhood social environment as it pertains to obesity. Of those studying the social environment, most focus on neighborhood safety/crime. For example, neighborhood rates of homicides have been linked to obesity in Cali, Colombia<sup>19</sup> and Belo Horizonte, Brazil,<sup>20</sup> whereas perceiving one's neighborhood as unsafe was associated with decreased physical activity in Curitiba, Brazil,<sup>6</sup> Sao Paulo, Brazil,<sup>21</sup> and Florianopolis, Brazil.<sup>7</sup>

1  
2  
3 To our knowledge, no studies in Latin America have looked into neighborhood social  
4 interactions – measured by social cohesion or social ties – and obesity,<sup>4</sup> but a study in Belo  
5 Horizonte, Brazil found that neighborhood social cohesion was positively associated with  
6 physical activity.<sup>22</sup>  
7  
8  
9  
10  
11

12 To fill-in such gaps in the literature and taking advantage of a rich and georeferenced  
13 dataset based on six large cities in Brazil, the aim of this study was to investigate if the  
14 neighborhood social environment – including social cohesion, perceived safety and violence –  
15 was associated with obesity among Brazilian adults, and to identify if this association varied by  
16 individual- and neighborhood-level socioeconomic status (SES). We hypothesized that the  
17 neighborhood social environment will be associated with obesity among Brazilian adults, more  
18 so in women than men, and that this association will be stronger among those living in low SES  
19 neighborhoods.  
20  
21  
22  
23  
24  
25  
26  
27  
28  
29  
30  
31  
32

### 33 **METHODS**

34  
35 Data comes from the baseline of the Brazilian Longitudinal Study of Adult Health (ELSA-  
36 Brasil), a multicenter cohort study designed to investigate the incidence and progression of  
37 cardiovascular disease and diabetes, as well as the biological, social, and environmental  
38 determinants of these conditions in the Brazilian population.<sup>23</sup> ELSA-Brasil data are collected  
39 among active and retired employees from universities/research centers located in six Brazilian  
40 state capitals: Salvador, Vitoria, Belo Horizonte, Porto Alegre, Sao Paulo, and Rio de Janeiro.<sup>23</sup>  
41  
42  
43  
44  
45  
46  
47  
48

49 Detailed data collection procedures are found elsewhere.<sup>23</sup> Briefly, participants were  
50 recruited via on-site and radio announcements, mailings, billboards, and phone calls. Eligible  
51 participants were also recruited using a list of employees stratified by age, gender, and  
52  
53  
54  
55  
56  
57  
58  
59  
60

1  
2  
3 occupation to ensure representativeness in key sub-groups. Baseline data collection occurred in  
4  
5 2008-2010, with a total sample of 15,105 (54% women), ages 35 to 74 years. Data collected  
6  
7 relevant to the current study include measured weight and height, sociodemographic information  
8  
9 (age, gender, educational attainment, self-reported skin color), and perceptions about  
10  
11 participants' neighborhood.  
12  
13

14  
15 Participants' residential addresses were georeferenced at the census tract level. In Brazil,  
16  
17 existing tracts used for census data collection are heterogenous in terms of size and composition;  
18  
19 they are often too small to capture the collective social processes we are set to investigate, while  
20  
21 also proving problematic for statistical analysis.<sup>24</sup> Therefore, neighborhoods were constructed by  
22  
23 combining contiguous census tracts with similar sociodemographic composition based on four  
24  
25 variables from the Brazilian Census 2010:<sup>25</sup> number of people per household, proportion of  
26  
27 children 0-4 years, mean income, and percent of white residents, following the same  
28  
29 methodology described by Santos et al. 2010.<sup>24</sup> Neighborhoods were defined with a minimum  
30  
31 population size of 5,000 inhabitants, a number deemed appropriate to be able to distinguish  
32  
33 between different socioeconomic patterns.<sup>24</sup> Our sample includes 11,456 individuals with  
34  
35 complete data and valid neighborhood definitions, corresponding to 76% of the ELSA-Brasil  
36  
37 participants; this sample lived in 1902 neighborhoods, with a mean population of 6.02  
38  
39 individuals per neighborhood (SD 9.82; median=3; min-max=1-139).  
40  
41  
42  
43

44  
45 ELSA-Brasil research protocol was approved by the Research Ethics Committees of São  
46  
47 Paulo University, Minas Gerais Federal University, Fundação Oswaldo Cruz, Espírito Santo  
48  
49 Federal University, Bahia Federal University, Rio Grande do Sul Federal University, and the  
50  
51 National Research Ethics Committee.  
52  
53  
54  
55  
56  
57  
58  
59  
60

1  
2  
3 The outcome of this study was obesity, defined as having a body mass index (BMI)>30  
4 kg/m<sup>2</sup>, based on measured weight and height. Our exposure variables were self-reported  
5  
6 measures of the neighborhood social environment, including social cohesion, perceived safety,  
7  
8 and perceived violence. The three scales used to measure social cohesion, perceived safety, and  
9  
10 perceived violence were cross-culturally adapted from existing validated ones,<sup>26,27</sup> including a  
11  
12 translation and back-translation from English to Portuguese.<sup>28</sup> Test-retest reliability was assessed  
13  
14 in a sub-sample of ELSA-Brasil participants to evaluate internal consistency and temporal  
15  
16 stability of the measurements; the scales were found to have good internal consistency (assessed  
17  
18 with Cronbach's alpha: 0.60 for social cohesion, 0.67 for perceived safety, 0.71 for perceived  
19  
20 violence) and very good reproducibility (assessed with intraclass correlation coefficients: 0.83  
21  
22 for social cohesion, 0.86 for perceived safety, 0.87 for perceived violence).<sup>28</sup> There was a low  
23  
24 correlation between the social cohesion and the perceived safety (Pearson correlation coefficient  
25  
26 [CC]=0.24) and the perceived violence (CC=0.26) scales in our sample, and a moderate  
27  
28 correlation between the perceived safety and perceived violence scales (CC=0.46). Correlation  
29  
30 coefficients were similar for women and men.  
31  
32  
33  
34  
35  
36  
37

38 Social cohesion, defined as the willingness of neighbors to intervene for the good of the  
39  
40 community,<sup>26</sup> was assessed with a 5-item scale: 1) this is a close-knit neighborhood; 2) people  
41  
42 around here are willing to help their neighbors; 3) people in this neighborhood don't get along  
43  
44 with each other; 4) people in this neighborhood do not share the same values; and 5) people in  
45  
46 this neighborhood can be trusted. Participants were asked their agreement level for these items  
47  
48 using a 5-point Likert scale ranging from 1="completely agree" to 5="completely disagree,"  
49  
50 with scores ranging from 5-25. Reverse coding was used as needed so that a higher score  
51  
52 indicated a higher social cohesion.  
53  
54  
55  
56  
57  
58  
59  
60



1  
2  
3 Perceived neighborhood safety was assessed with a 3-item scale: 1) I feel safe walking in  
4 my neighborhood, day or night; 2) violence is a problem in my neighborhood; and 3) my  
5 neighborhood is safe from crime, with participants reporting their agreement level with these  
6 items following the same 5-point Likert scale as above. Individual scores ranged from 3-15.  
7  
8 Items 1 and 3 were reverse coded so that a higher score indicated a higher perceived safety.  
9  
10  
11  
12  
13  
14

15 Perceived neighborhood violence was assessed based on 5 items, referring to the previous  
16 6 months: 1) how often was there a fight in this neighborhood in which a weapon was used?; 2)  
17 how often was there a violent argument between neighbors?; 3) how often was there a gang  
18 fight?; 4) how often was there a sexual assault or rape?; and 5) how often was there a robbery or  
19 mugging?. Response options ranged from 1="frequently" to 4="never," with individual scores  
20 ranging from 5 to 20 and a higher score representing lower perceived violence. For all these  
21 neighborhood scales, thus, a higher score meant something positive: higher social cohesion,  
22 higher perceived safety, and lower perceived violence. For all analyses, individual-level scores  
23 on social cohesion, perceived safety and perceived violence were each aggregated at the  
24 neighborhood level, so that all participants living in the same neighborhood would have the same  
25 level of exposure. Further, neighborhood-level scores were converted into tertiles to simplify  
26 interpretation as the three sets of scores followed different scales with different ranges of  
27 responses. Neighborhoods were then classified as being in the lowest, middle, or highest tertile  
28 of exposure for each neighborhood predictor.  
29  
30  
31  
32  
33  
34  
35  
36  
37  
38  
39  
40  
41  
42  
43  
44  
45  
46  
47

48 Covariates included participants' age (continuous), gender, educational attainment (up to  
49 primary, secondary, and university), and self-reported skin color (White, Brown ["mixed race"],  
50 Black, Asian, and Indigenous; Asian and Indigenous were dropped from the analysis because of  
51 their small sample size).  
52  
53  
54  
55  
56  
57  
58  
59  
60

1  
2  
3 Neighborhood SES was created based on the same four census variables used for  
4 neighborhood definition. A principal component analysis followed by a cluster analysis were  
5 used to classify neighborhoods into three SES categories. Two principal components emerged  
6 from the analysis, explaining 87% of the SES variability; the first component was composed by  
7 *number of people per household* and *proportion of children 0-4 years*, whereas the second  
8 component was composed by *median income* and *percent of white residents*. We forced these  
9 principal components into three clusters, which resulted in low, intermediate, and high  
10 neighborhood SES classifications. Characteristics of these low, intermediate, and high SES  
11 neighborhoods are displayed in Supplementary Table S1.  
12  
13  
14  
15  
16  
17  
18  
19  
20  
21  
22  
23  
24  
25

### 26 **Patient and public involvement**

27 Patients were not involved in the development of this study.  
28  
29  
30  
31  
32

### 33 **Statistical analysis**

34 We ran gender-stratified 3-level hierarchical multilevel logistic regression models as  
35 individuals (level 1) were nested within neighborhoods (level 2) and within ELSA sites (level 3),  
36 and the outcome variable (obesity) was dichotomous. Model 1 was minimally adjusted by age  
37 while Model 2 was adjusted by age, education, and skin color, as well as by individual-level  
38 scores on the social cohesion, perceived safety, and perceived violence scales for the models  
39 with neighborhood social cohesion, perceived safety, and perceived violence as outcomes,  
40 respectively. This latter adjustment allowed us to account for individual variations in  
41 neighborhood perceptions and to obtain neighborhood effects above and beyond individual  
42 effects.  
43  
44  
45  
46  
47  
48  
49  
50  
51  
52  
53  
54  
55  
56  
57  
58  
59  
60

1  
2  
3 Further, we ran models stratified by neighborhood SES to see if it modified the  
4 association between the neighborhood social environment and obesity. For these models,  
5 neighborhood-level scores of our three neighborhood variables were reconverted into tertiles  
6 *within* each neighborhood SES category. All analyses were carried out in SAS v9.4 (SAS  
7 Institute Inc., Cary, NC, USA) with a p-value<0.05 denoting statistical significance.  
8  
9  
10  
11  
12  
13  
14  
15  
16  
17

## 18 RESULTS

19  
20  
21 Table 1 displays the sample characteristics for the whole sample and by obesity status. Women  
22 comprised the majority of the sample (56%); compared to men in the sample, women had a  
23 higher education and were more likely to be black. Obesity was more prevalent among women  
24 (23%) than men (20%) and among middle-aged participants (46-65 years). We observed social  
25 inequities based on education and skin color, with decreased obesity prevalence as education  
26 increased, and black participants having the highest prevalence of obesity compared to white  
27 participants (29% vs. 20%). We observed an obesity gradient for neighborhood social cohesion  
28 and perceived violence, indicating that residents of the least cohesive and most self-perceived  
29 violent neighborhoods had a higher prevalence of obesity than those in the most cohesive and  
30 least violent neighborhoods, respectively. Residents of the poorest neighborhoods had a higher  
31 obesity prevalence compared to those in the richest (26% vs. 19%).  
32  
33  
34  
35  
36  
37  
38  
39  
40  
41  
42  
43  
44  
45  
46

47 Results of the multilevel logistic regression models predicting obesity by neighborhood  
48 social cohesion, perceived safety, and perceived violence are shown in Tables 2, 3, and 4,  
49 respectively. Neighborhood social cohesion was associated with obesity for women only, and  
50 this association remained after adjusting for age, education, skin color, and individual-level  
51  
52  
53  
54  
55  
56  
57  
58  
59  
60

1  
2  
3 social cohesion scores. In fully adjusted models, women who lived in the least socially cohesive  
4 neighborhoods had 26% higher odds of being obese compared to women living in the most  
5 socially cohesive neighborhoods (Table 2). We observed no associations between perceived  
6 safety and obesity (Table 3). In turn, perceived violence was associated with obesity among  
7 women only: women living in the most violent neighborhoods had 27% higher odds of obesity  
8 compared to women who lived in the least violent neighborhoods, adjusting for age, education,  
9 skin color, and individual-level perceived violence scores (Table 4).

10  
11  
12  
13  
14  
15  
16  
17  
18  
19  
20 Table 5 displays the results of the analysis stratified by neighborhood SES. For social  
21 cohesion, our results remained only among women living in high SES neighborhoods: women in  
22 the least socially cohesive neighborhoods had 52% higher odds of obesity compared to women  
23 living in the most socially cohesive neighborhoods *within high SES neighborhoods*. Oppositely,  
24 our results with perceived violence remained for women in poor neighborhoods: *within low SES*  
25 *neighborhoods*, women living in the most violent neighborhoods had 84% higher odds of obesity  
26 compared to those living in the least violent neighborhoods. Associations also emerged in the  
27 intermediate SES category, suggesting a dose-response association between perceived violence  
28 and obesity for those in low SES neighborhoods.  
29  
30  
31  
32  
33  
34  
35  
36  
37  
38  
39  
40  
41  
42  
43  
44  
45  
46  
47  
48  
49  
50  
51  
52  
53  
54  
55  
56  
57  
58  
59  
60

**Table 1:** Characteristics of the sub-sample of ELSA-Brasil participants included in the study, stratified by obesity status (N=11,456)

|                                                    | <b>Not obese<br/>(BMI&lt;30<br/>kg/m<sup>2</sup>)<br/>Row %</b> | <b>Obese<br/>(BMI≥30<br/>kg/m<sup>2</sup>)<br/>Row %</b> | <b>Total<br/>N (%)</b> |
|----------------------------------------------------|-----------------------------------------------------------------|----------------------------------------------------------|------------------------|
| <b>INDIVIDUAL-LEVEL VARIABLES</b>                  |                                                                 |                                                          |                        |
| <b>Gender</b>                                      |                                                                 |                                                          |                        |
| Women                                              | 76.6                                                            | 23.4                                                     | 6427 (56.1)            |
| Men                                                | 80.1                                                            | 19.9                                                     | 5025 (43.9)            |
| <b>Age group (years)</b>                           |                                                                 |                                                          |                        |
| 34-45                                              | 81.9                                                            | 18.1                                                     | 2841 (24.8)            |
| 46-55                                              | 76.9                                                            | 23.1                                                     | 4400 (38.4)            |
| 56-65                                              | 76.4                                                            | 23.6                                                     | 3077 (26.9)            |
| >65                                                | 78.5                                                            | 21.5                                                     | 1134 (9.9)             |
| <b>Education</b>                                   |                                                                 |                                                          |                        |
| Less than primary                                  | 72.0                                                            | 28.0                                                     | 522 (4.6)              |
| Primary                                            | 73.8                                                            | 26.2                                                     | 646 (5.6)              |
| Secondary                                          | 74.3                                                            | 25.7                                                     | 3543 (30.9)            |
| University                                         | 81.1                                                            | 18.9                                                     | 6741 (58.9)            |
| <b>Skin color</b>                                  |                                                                 |                                                          |                        |
| White                                              | 80.3                                                            | 19.7                                                     | 6127 (56.2)            |
| Brown                                              | 77.3                                                            | 22.7                                                     | 3052 (28.0)            |
| Black                                              | 70.6                                                            | 29.4                                                     | 1719 (15.8)            |
| <b>NEIGHBORHOOD-LEVEL VARIABLES</b>                |                                                                 |                                                          |                        |
| <b>Social cohesion (mean 17.3, SD 3.6)</b>         |                                                                 |                                                          |                        |
| Lowest tertile (range 5-16.3; mean 14.3, SD 2.0)   | 76.0                                                            | 24.0                                                     | 2156 (18.8)            |
| Middle tertile (range 16.3-18; mean 17.1, SD 0.4)  | 78.3                                                            | 21.7                                                     | 5671 (49.5)            |
| Highest tertile (range 18-25; mean 19.4, SD 1.5)   | 79.2                                                            | 20.8                                                     | 3629 (31.7)            |
| <b>Perceived safety (mean 9.5, SD 3.2)</b>         |                                                                 |                                                          |                        |
| Lowest tertile (range 3-8.4; mean 6.5, SD 7.0)     | 76.8                                                            | 23.2                                                     | 2899 (25.3)            |
| Middle tertile (range 8.4-10; mean 9.2, SD 0.4)    | 79.1                                                            | 20.9                                                     | 4648 (40.6)            |
| Highest tertile (range 10-15; mean 11.3, SD 1.3)   | 78.1                                                            | 21.9                                                     | 3909 (34.1)            |
| <b>Perceived violence (mean 16.8, SD 2.8)</b>      |                                                                 |                                                          |                        |
| Lowest tertile (range 7-16; mean 13.8, SD 1.8)     | 74.9                                                            | 25.1                                                     | 2584 (22.6)            |
| Middle tertile (range 16-17.5; mean 16.7, SD 0.5)  | 78.6                                                            | 21.4                                                     | 4783 (41.8)            |
| Highest tertile (range 17.5-20; mean 18.5, SD 0.7) | 79.7                                                            | 20.3                                                     | 4089 (35.7)            |
| <b>Neighborhood SES</b>                            |                                                                 |                                                          |                        |
| Low                                                | 74.1                                                            | 25.9                                                     | 2812 (24.6)            |
| Intermediate                                       | 76.9                                                            | 23.1                                                     | 3418 (29.8)            |
| High                                               | 81.2                                                            | 18.8                                                     | 5225 (45.6)            |

**Table 2:** Results from the multilevel logistic regression model predicting obesity (BMI $\geq$ 30 kg/m<sup>2</sup>) by neighborhood social cohesion; gender-stratified (N= 6,107 women; 4,791 men)

|                         | Model 1<br>OR (95%CI)   |                  | Model 2<br>OR (95%CI)   |                         |
|-------------------------|-------------------------|------------------|-------------------------|-------------------------|
|                         | Women                   | Men              | Women                   | Men                     |
| <b>Neighborhood</b>     |                         |                  |                         |                         |
| <b>Social cohesion</b>  |                         |                  |                         |                         |
| Lowest tertile          | <b>1.38 (1.11-1.71)</b> | 0.99 (0.78-1.26) | <b>1.26 (1.00-1.58)</b> | 0.90 (0.70-1.16)        |
| Middle tertile          | 1.11 (0.93-1.32)        | 0.97 (0.80-1.18) | 1.08 (0.91-1.29)        | 0.97 (0.80-1.17)        |
| Highest tertile         | 1.00                    | 1.00             | 1.00                    | 1.00                    |
| <b>Age</b>              | <b>1.02 (1.01-1.03)</b> | 1.00 (0.99-1.01) | <b>1.02 (1.01-1.03)</b> | 1.00 (0.99-1.01)        |
| <b>Individual-level</b> |                         |                  |                         |                         |
| <b>social cohesion</b>  |                         |                  |                         |                         |
| <b>Education</b>        |                         |                  |                         |                         |
| Primary or less         |                         |                  | <b>1.47(1.14-1.89)</b>  | 1.10 (0.84-1.44)        |
| Secondary               |                         |                  | <b>1.48 (1.26-1.73)</b> | 1.10 (0.90-1.34)        |
| University              |                         |                  | 1.00                    | 1.00                    |
| <b>Skin color</b>       |                         |                  |                         |                         |
| Black                   |                         |                  | <b>1.82 (1.50-2.21)</b> | <b>1.40 (1.08-1.82)</b> |
| Brown                   |                         |                  | <b>1.35 (1.13-1.61)</b> | 1.11 (0.91-1.36)        |
| White                   |                         |                  | 1.00                    | 1.00                    |

**Table 3:** Results from the multilevel logistic regression model predicting obesity (BMI $\geq$ 30 kg/m<sup>2</sup>) by perceived neighborhood safety; gender-stratified (N= 6,107 women; 4,791 men)

|                         | Model 1<br>OR (95%CI)   |                  | Model 2<br>OR (95%CI)   |                         |
|-------------------------|-------------------------|------------------|-------------------------|-------------------------|
|                         | Women                   | Men              | Women                   | Men                     |
| <b>Neighborhood</b>     |                         |                  |                         |                         |
| <b>Perceived safety</b> |                         |                  |                         |                         |
| Lowest tertile          | 1.18 (0.96-1.44)        | 1.05 (0.85-1.29) | 1.14 (0.92-1.41)        | 1.04 (0.82-1.32)        |
| Middle tertile          | 0.96 (0.80-1.15)        | 0.97 (0.80-1.17) | 0.95 (0.80-1.14)        | 0.98 (0.80-1.19)        |
| Highest tertile         | 1.00                    | 1.00             | 1.00                    | 1.00                    |
| <b>Age</b>              | <b>1.02 (1.01-1.03)</b> | 1.00 (0.99-1.01) | <b>1.02 (1.01-1.03)</b> | 1.00 (1.00-1.01)        |
| <b>Individual-level</b> |                         |                  |                         |                         |
| <b>perceived safety</b> |                         |                  | 1.00 (0.94-1.02)        | 1.00 (0.98-1.03)        |
| <b>Education</b>        |                         |                  |                         |                         |
| Primary or less         |                         |                  | <b>1.50 (1.16-1.93)</b> | 1.10 (0.84-1.43)        |
| Secondary               |                         |                  | <b>1.49 (1.27-1.74)</b> | 1.10 (0.90-1.33)        |
| University              |                         |                  | 1.00                    | 1.00                    |
| <b>Skin color</b>       |                         |                  |                         |                         |
| Black                   |                         |                  | <b>1.83 (1.51-2.23)</b> | <b>1.40 (1.08-1.81)</b> |
| Brown                   |                         |                  | <b>1.36 (1.14-1.63)</b> | 1.11 (0.91-1.36)        |
| White                   |                         |                  | 1.00                    | 1.00                    |

**Table 4:** Results from the multilevel logistic regression model predicting obesity (BMI $\geq$ 30 kg/m<sup>2</sup>) by perceived neighborhood violence; gender-stratified (N= 6,107 women; 4,791 men)

|                                       | Model 1<br>OR (95%CI)   |                  | Model 2<br>OR (95%CI)   |                         |
|---------------------------------------|-------------------------|------------------|-------------------------|-------------------------|
|                                       | Women                   | Men              | Women                   | Men                     |
| <b>Neighborhood</b>                   |                         |                  |                         |                         |
| <b>Perceived violence<sup>1</sup></b> |                         |                  |                         |                         |
| Lowest tertile                        | <b>1.61 (1.31-1.98)</b> | 1.17 (0.94-1.46) | <b>1.27 (1.01-1.59)</b> | 1.06 (0.82-1.36)        |
| Middle tertile                        | 1.12 (0.94-1.34)        | 1.02 (0.85-1.24) | 1.03 (0.86-1.23)        | 0.99 (0.82-1.20)        |
| Highest tertile                       | 1.00                    | 1.00             | 1.00                    | 1.00                    |
| <b>Age</b>                            | <b>1.02 (1.01-1.03)</b> | 1.00 (1.00-1.01) | <b>1.02 (1.01-1.03)</b> | 1.00 (1.00-1.01)        |
| <b>Individual-level</b>               |                         |                  |                         |                         |
| <b>perceived violence</b>             |                         |                  | 0.98 (0.96-1.00)        | 0.99 (0.96-1.02)        |
| <b>Education</b>                      |                         |                  |                         |                         |
| Primary or less                       |                         |                  | <b>1.44 (1.11-1.86)</b> | 1.09 (0.83-1.42)        |
| Secondary                             |                         |                  | <b>1.44 (1.23-1.68)</b> | 1.09 (0.89-1.32)        |
| University                            |                         |                  | 1.00                    | 1.00                    |
| <b>Skin color</b>                     |                         |                  |                         |                         |
| Black                                 |                         |                  | <b>1.79 (1.47-2.18)</b> | <b>1.39 (1.07-1.81)</b> |
| Brown                                 |                         |                  | <b>1.34 (1.12-1.61)</b> | 1.11 (0.90-1.36)        |
| White                                 |                         |                  | 1.00                    | 1.00                    |

<sup>1</sup>The perceived violence scale was constructed so that a higher score indicated a lower perceived violence. Therefore, the *lowest tertile* category represents neighborhoods with the highest perceived violence.



**Table 5:** Results from the multilevel logistic regression model predicting obesity ( $\text{BMI} \geq 30 \text{ kg/m}^2$ ) by neighborhood social cohesion, by perceived safety, and by perceived violence independently, and stratified by neighborhood socioeconomic status (SES) and gender<sup>1</sup>

|                           | High SES<br>OR (95% CI) |                  | Intermediate SES<br>OR (95%CI) |                  | Low SES<br>OR (95%CI)   |                  |
|---------------------------|-------------------------|------------------|--------------------------------|------------------|-------------------------|------------------|
|                           | Women                   | Men              | Women                          | Men              | Women                   | Men              |
| <b>Social cohesion</b>    |                         |                  |                                |                  |                         |                  |
| N                         | 2799                    | 2144             | 1882                           | 1371             | 1410                    | 1268             |
| Lowest tertile            | <b>1.52 (1.10-2.10)</b> | 1.01 (0.71-1.43) | 0.90 (0.59-1.37)               | 0.96 (0.62-1.50) | 1.42 (0.92-2.18)        | 0.91 (0.55-1.50) |
| Middle tertile            | 1.07 (0.81-1.42)        | 0.99 (0.73-1.34) | 1.07 (0.78-1.48)               | 0.82 (0.57-1.18) | 1.00 (0.72-1.41)        | 0.85 (0.57-1.28) |
| Highest tertile           | 1.00                    | 1.00             | 1.00                           | 1.00             | 1.00                    | 1.00             |
| <b>Perceived safety</b>   |                         |                  |                                |                  |                         |                  |
| N                         | 2804                    | 2148             | 1882                           | 1371             | 1413                    | 1269             |
| Lowest tertile            | 1.03 (0.73-1.44)        | 0.96 (0.67-1.37) | 0.82 (0.55-1.22)               | 1.06 (0.68-1.66) | 1.30 (0.84-2.00)        | 1.12 (0.68-1.84) |
| Middle tertile            | 0.97 (0.72-1.30)        | 0.85 (0.62-1.15) | 0.85 (0.61-1.18)               | 0.96 (0.66-1.40) | 1.24 (0.89-1.73)        | 0.94 (0.63-1.40) |
| Highest tertile           | 1.00                    | 1.00             | 1.00                           | 1.00             | 1.00                    | 1.00             |
| <b>Perceived violence</b> |                         |                  |                                |                  |                         |                  |
| N                         | 2799                    | 2139             | 1875                           | 1369             | 1412                    | 1269             |
| Lowest tertile            | 0.98 (0.70-1.37)        | 1.16 (0.79-1.71) | 1.25 (0.83-1.89)               | 1.01 (0.64-1.60) | <b>1.84 (1.17-2.91)</b> | 0.98 (0.57-1.68) |
| Middle tertile            | 0.87 (0.65-1.15)        | 1.06 (0.78-1.42) | 1.02 (0.72-1.44)               | 0.83 (0.56-1.22) | <b>1.66 (1.16-2.37)</b> | 1.00 (0.67-1.50) |
| Highest tertile           | 1.00                    | 1.00             | 1.00                           | 1.00             | 1.00                    | 1.00             |

<sup>1</sup>All models adjusted by age, education, and skin color, as well as by individual-level social cohesion, perceived safety, and perceived violence scores for the neighborhood social cohesion, perceived safety, and perceived violence models, respectively.

<sup>2</sup>The perceived violence scale was constructed so that a higher score indicated a lower perceived violence. Therefore, the *lowest tertile* category represents neighborhoods with the highest perceived violence.

## DISCUSSION

In this study based on a civil-servant sample of adults living in six large cities in Brazil, we found that living in a neighborhood with low social cohesion and high levels of self-perceived violence was associated with higher odds of obesity among women but not men. After stratifying by neighborhood SES, the association between living in the least socially cohesive neighborhoods and obesity remained only among women living in high SES neighborhoods, whereas the association between living in the most violent neighborhoods and obesity remained only for women residing in low SES neighborhoods.

Studies in Latin America<sup>19,20</sup> and elsewhere<sup>8</sup> also report an association between neighborhood violence and obesity among adults. The hypothesized mechanisms involved are a reduction in outdoor physical activity, related to the fear of being outdoors, as well as the direct stress caused by living in an unsafe neighborhood. There is support for both hypotheses in the literature, as neighborhood crime/violence is associated with a decreased physical activity,<sup>6-8</sup> and also with an increase in stress and a worse mental health.<sup>29,30</sup> Chronic stress, in turn, has been linked to an increased obesity risk due to its influence on weight-related behaviors and by dysregulating the hypothalamic-pituitary-adrenal axis, leading to abdominal fat deposition.<sup>31</sup>

There are mixed results in relation to neighborhood social cohesion and obesity in high-income countries,<sup>5,32,33</sup> though most studies have found protective effects.<sup>4</sup> As far as the authors know, no previous studies have looked at this association in Latin America. Similar to our findings, Cohen et al. (2006) found that residents of neighborhoods with lower collective efficacy – a concept highly linked to social cohesion – had higher BMIs in Los Angeles, CA, U.S.<sup>5</sup> Burdette et al. (2006), in turn, found no such association among women living in 20 U.S. cities.<sup>32</sup>

1  
2  
3 Social cohesion is hypothesized to act as a buffer from neighborhood-related stress and,  
4 through this mechanism, be protective of obesity. Cohen et al. (2006) also suggest that adults in  
5 neighborhoods with higher social cohesion may be willing to intervene in aspects of the  
6 neighborhood that influence weight-related behaviors; for example, setting up sports leagues or  
7 influencing local food stores to carry healthier offerings.<sup>5</sup> However, the opposite can also be true,  
8 with residents in high-social-cohesion neighborhoods uniting for negative things as they pertain  
9 to obesity, for example, standing against soda taxation or against bans of unhealthy vending  
10 machines.<sup>4</sup>  
11  
12  
13  
14  
15  
16  
17  
18  
19  
20  
21

22 We found that neighborhood social cohesion and perceived violence only influences the  
23 obesity risk of Brazilian women and not men, even though there were no gender differences in  
24 the social cohesion, perceived safety, and perceived violence average individual scores. This  
25 finding that women are more affected by their neighborhood environment, particularly the social  
26 one, is not new.<sup>34-36</sup> Rech et al. 2012 found that perception of safety during the day was  
27 associated with leisure walking among women but not men among a convenience sample of  
28 adults in Curitiba, Brazil.<sup>6</sup> Similarly, a study in Los Angeles, CA, U.S. found that women living  
29 in high-poverty neighborhoods exercised less than men, partly due to safety concerns associated  
30 with accessing outdoor parks.<sup>35</sup> Moreover, Guilcher et al. (2017) found that a higher  
31 neighborhood social cohesion was associated with lower odds of obesity only among women in a  
32 sample of adults in Toronto, Canada.<sup>33</sup> Reasons why neighborhood effects may be stronger for  
33 women than men include differences in their neighborhood perceptions (which is not the case in  
34 our sample), an increased exposure (i.e. women spending more time in their residential  
35 neighborhoods), or an increased vulnerability (i.e. women being more impacted by their  
36 surroundings).<sup>34</sup> Further, women are more often victims of sexual violence than men,<sup>3,8</sup> and this  
37  
38  
39  
40  
41  
42  
43  
44  
45  
46  
47  
48  
49  
50  
51  
52  
53  
54  
55  
56  
57  
58  
59  
60

1  
2  
3 may influence the time they spend outdoors – and hence their physical activity levels – as well as  
4  
5 their stress levels, particularly among women in low SES neighborhoods.  
6  
7

8           A previous study conducted in the south of Brazil found neighborhood-level variations in  
9  
10 obesity prevalence for both men and women; however, neighborhood-level education was only  
11  
12 associated with obesity among women in the sample.<sup>37</sup> Another study using ELSA-Brasil data  
13  
14 found that the food and physical activity neighborhood environments were associated with  
15  
16 obesity among women but not men.<sup>38</sup> The results of these studies and our own suggest that the  
17  
18 neighborhood environment may matter for men’s obesity risk, but the neighborhood factors  
19  
20 studied to date are relevant only for women. Future studies should further investigate which  
21  
22 neighborhood factors, if any, affect obesity risk among men in Brazil and other Latin American  
23  
24 settings, as well as the reason why neighborhood factors may affect women’s and men’s obesity  
25  
26 risk differently.  
27  
28  
29  
30  
31

32           Finally, we found that the effect of social cohesion and perceived violence on obesity  
33  
34 among women varied by neighborhood SES. Two studies of the neighborhood social  
35  
36 environments in Brazil have found differential effects of these neighborhood variables on  
37  
38 physical activity by *individual*-level SES. Andrade et al. (2015) reports a positive association  
39  
40 between social cohesion and physical activity only among low-SES individuals in Belo  
41  
42 Horizonte, Brazil.<sup>22</sup> This contradicts our findings that a lower social cohesion was associated  
43  
44 with a higher obesity risk among women living in high-SES neighborhoods. In turn, Rech et al.  
45  
46 (2012) found that negative associations between safety perceptions and physical inactivity in  
47  
48 Curitiba, Brazil were only present among high-SES individuals.<sup>6</sup> We found that perceived  
49  
50 neighborhood violence increased obesity risk among women in low-SES neighborhoods only.  
51  
52  
53  
54  
55  
56  
57  
58  
59  
60

1  
2  
3 Even though we found minimal variations in perceived violence scores by neighborhood  
4 SES in our sample (Supplementary Table S1), women living in low SES neighborhoods may be  
5 more impacted by their perceived neighborhood violence than those living in high SES  
6 neighborhoods. For example, residents of high SES neighborhoods may be more likely to have  
7 cars and access (monetary and physical) to indoor places for exercising (e.g. gyms). This would  
8 mean that high-SES neighborhood residents could more effectively avoid spending time  
9 outdoors in their neighborhoods without this having a severe impact on their physical activity  
10 behaviors and/or stress, the suggested mechanisms linking perceived violence and obesity.  
11 Scores of neighborhood social cohesion are also similar in our sample across neighborhood SES  
12 categories (Supplementary Table S1). Why social cohesion would be associated with obesity  
13 only among women residing in high-SES neighborhoods requires further investigation.  
14  
15  
16  
17  
18  
19  
20  
21  
22  
23  
24  
25  
26  
27  
28

29 Our results suggest that neighborhood interventions to increase social cohesion and  
30 decrease violence perceptions may prevent obesity among women in Brazil. Effective  
31 neighborhood interventions designed to reduce violence may include the cleaning and greening  
32 of vacant lots, as well as the reduction of alcohol availability.<sup>39</sup> Though the effect of these kinds  
33 of interventions on *perceived* violence is unknown, research suggests that *fear of crime* may be  
34 negatively influenced by neglected and run-down neighborhood spaces.<sup>40</sup> The greening of vacant  
35 lots may also work at increasing social cohesion and social interactions, based on evidence  
36 available from public gardening research.<sup>41</sup> Increasing access to safe public spaces may also help  
37 increase social cohesion and, thus decrease obesity risk. Salvo et al.,<sup>42</sup> for example, found that  
38 residents of Bogota, Colombia and Cuernavaca, Mexico reported shopping malls and nightclubs  
39 as places where they engaged in physical activity with friends, highlighting that public places  
40 that allow for social interactions may be important for weight-related behaviors. Another option  
41  
42  
43  
44  
45  
46  
47  
48  
49  
50  
51  
52  
53  
54  
55  
56  
57  
58  
59  
60

1  
2  
3 to potentially increase neighborhood trust and thus social cohesion while reducing crime is  
4  
5 instituting neighborhood watches.<sup>43</sup> It can be argued, however, that participating in neighborhood  
6  
7 watches may increase crime awareness and, thus, have a counteractive effect.<sup>40</sup>  
8  
9  
10

### 11 12 13 **Strengths and limitations** 14

15 This study is based on civil-servants in six large cities in Brazil; therefore, our sample excludes  
16  
17 the extremely poor and unemployed and so our results may only be generalizable to Brazilian  
18  
19 adults with stable employment. However, the ELSA-Brasil sample is diverse in terms of  
20  
21 sociodemographic characteristics, including diverse regions within Brazil. Moreover, whereas  
22  
23 the ELSA-Brasil sample has, on average, a higher income and social class than the residents of  
24  
25 the six included cities,<sup>25,44</sup> the ELSA-Brasil sample has a similar prevalence of obesity and  
26  
27 obesity-related behaviors (i.e. diet and physical activity patterns) than the Brazilian population at  
28  
29 large.<sup>45</sup>  
30  
31  
32  
33

34 Data collection was based on validated questionnaires and scales, as well as direct body  
35  
36 measurements which allowed us to estimate obesity based on measured weight and height as  
37  
38 opposed to self-reports. The neighborhood social environment variables, however, are all self-  
39  
40 reported and we did not have access to objective measures of crime/violence in the  
41  
42 neighborhood. Another limitation includes the cross-sectional design, which prevents us from  
43  
44 establishing the directionality of the associations. However, the ELSA-Brasil population is  
45  
46 highly stable in terms of neighborhood residence, with an average of 15-year length of residence  
47  
48 in their current neighborhood.  
49  
50  
51  
52  
53  
54  
55  
56  
57  
58  
59  
60

## CONCLUSIONS

To our knowledge, this is one of the few studies in Latin America examining the association between the neighborhood social environment and obesity, providing key insights into the likelihood of success of neighborhood-level interventions addressing obesity in the Brazilian context, in particular. Our results suggest that an increase in neighborhood social cohesion and a reduction in the perception of neighborhood violence may be protective of obesity among Brazilian women, with the latter particularly true for women living in poverty. Further research is needed to test some of the proposed interventions in Brazil and other Latin American countries, with an aim to strengthen existing communities while improving the public's health. Future research should also clarify the reasons why the neighborhood social environment in both high and low- and middle-income countries seem to affect women more than men.

## ACKNOWLEDGEMENTS

We thank all ELSA-Brasil participants for their invaluable contribution to this study.

## DATA SHARING

The data used in this study are available for research proposals on request to the ELSA's Datacenter and to the ELSA's Publications Committee (publiELSA). Additional information can be obtained from the ELSA's Datacenter ([estatisticaelsa@ufrgs.br](mailto:estatisticaelsa@ufrgs.br)) and from the ELSA Coordinator from the Research Center of Rio de Janeiro ([rohgriep@ioc.fiocruz.br](mailto:rohgriep@ioc.fiocruz.br)).

## DISCLOSURE

The authors declared no conflict of interest.

## FUNDING

This study was funded by the Brazilian Ministry of Health (Department of Science and Technology) and the Brazilian Ministry of Science, Technology and Innovation (FINEP, Financiadora de Estudos e Projetos and CNPq, National Research Council), Grant No 01 06 0010.00, 01 06 0212.00, 01 06 0300.00, 01 06 0278.00, 01 06 0115.00 and 01 06 0071.00. DC, LG, RHG, SMB, and SMAM are research fellows of the National Research Council (CNPq). DC, LOC, and RHG are supported by a research grant (*Cientistas do Nosso Estado*) from the *Fundação de Amparo à Pesquisa do Estado do Rio de Janeiro - FAPERJ*, Brazil. MPC received a COR Research Fellowship from the Tulane University Senate Committee on Research and the Tulane Provost's Office, which funded her travels to Brazil.



**REFERENCES**

1. Diez-Roux AV, Mair C. Neighborhoods and health. *Ann NY Acad Sci* 2010;1186(1):125-145.
2. Gee GC, Payne-Sturges DC. Environmental health disparities: a framework integrating psychosocial and environmental concepts. *Environ Health Perspect* 2004;112(17):1645-1653.
3. Suglia SF, Shelton RC, Hsiao A, Wang YC, Rundle A, Link BG. Why the neighborhood social environment is critical in obesity prevention. *J Urban Health* 2016;93(1):206-212.
4. Carrillo-Alvarez E, Kawachi I, Riera-Romani J. Neighbourhood social capital and obesity: a systematic review of the literature. *Obes Rev* 2019;20:119-141.
5. Cohen DA, Finch BK, Bower A, Sastry N. Collective efficacy and obesity: The potential influence of social factors on health. *Soc Sci Med* 2006;62(3):769-778.
6. Rech CR, Reis RS, Hino AAF, et al. Neighborhood safety and physical inactivity in adults from Curitiba, Brazil. *Int J Behav Nutr Phys Act.* 2012;9(1):72.
7. Weber Corseuil M, Hallal PC, Xavier Corseuil H, Jayce Ceola Schneider I, d'Orsi E. Safety from crime and physical activity among older adults: a population-based study in Brazil. *J Environ Public Health* 2012;2012:7.
8. Yu E, Lippert Adam M. Neighborhood crime rate, weight-related behaviors, and obesity: a systematic review of the literature. *Sociol Compass* 2016;10(3):187-207.
9. Lovasi GS, Hutson MA, Guerra M, Neckerman KM. Built environments and obesity in disadvantaged populations. *Epidemiol Rev* 2009;31(1):7-20.
10. Kline L, Jones-Smith J, Miranda JJ, et al. A research agenda to guide progress on childhood obesity prevention in Latin America. *Obes Rev* 2017;18(S2):19-27.

- 1  
2  
3 11. Rivera JÁ, de Cossío TG, Pedraza LS, Aburto TC, Sánchez TG, Martorell R. Childhood  
4 and adolescent overweight and obesity in Latin America: a systematic review. *Lancet*  
5  
6 *Diab Endocrinol* 2014;2(4):321-332.  
7
- 8  
9  
10 12. Pérez-Escamilla R, Lutter CK, Rabadan-Diehl C, et al. Prevention of childhood obesity  
11 and food policies in Latin America: from research to practice. *Obes Rev* 2017;18(S2):28-  
12  
13 38.  
14
- 15  
16  
17 13. Brazilian Ministry of Health, 2017. [VIGITEL Brasil 2016. Habits of Brazilians affect  
18 the growth in obesity and the increased prevalence of diabetes and hypertension];  
19 <http://portalarquivos.saude.gov.br/images/pdf/2017/abril/17/Vigitel.pdf>. Accessed  
20  
21 February 15, 2019.  
22  
23
- 24  
25  
26 14. Molina M, Serván-Mori E, Quezada AD, Colchero MA. Is there a link between  
27 availability of food and beverage establishments and BMI in Mexican adults? *Public*  
28  
29 *Health Nutr* 2017;20(18):3326-3332.  
30  
31
- 32  
33 15. Chor D, Cardoso LO, Nobre AA, et al. Association between perceived neighbourhood  
34 characteristics, physical activity and diet quality: results of the Brazilian Longitudinal  
35  
36 Study of Adult Health (ELSA-Brasil). *BMC Public Health*. 2016;16:751.  
37  
38
- 39  
40 16. Hino AAF, Rech CR, Gonçalves PB, Reis R. Perceived neighborhood environment and  
41 leisure time physical activity among adults from Curitiba, Brazil. *Rev Bras Cineantropom*  
42  
43 *Desempenho Hum* 2017;19:596-607.  
44  
45
- 46  
47 17. Mendonça G, Florindo AA, Rech CR, de Freitas DKS, de Farias Júnior JC. Perceived  
48 neighborhood environmental characteristics and different types of physical activity  
49  
50 among Brazilian adolescents. *J Sport Sci* 2018;36(9):1068-1075.  
51  
52  
53  
54  
55  
56  
57  
58  
59  
60

18. Gómez LF, Parra DC, Buchner D, et al. Built environment attributes and walking patterns among the elderly population in Bogota. *Am J Prev Med.* 2010;38(6):592-599.
19. Martinez L, Prada S, Estrada D. Homicides, public goods, and population health in the context of high urban violence rates in Cali, Colombia. *J Urban Health* 2018;95:391-400.
20. Mendes LL, Nogueira H, Padez C, Ferrao M, Velasquez-Melendez G. Individual and environmental factors associated for overweight in urban population of Brazil. *BMC Public Health* 2013;13:988-988.
21. Florindo AA, Salvador EP, Reis RS, Guimarães VV. Perception of the environment and practice of physical activity by adults in a low socioeconomic area. *Rev Saude Publica* 2011;45:302-310.
22. Andrade ACdS, Peixoto SV, Friche AAdL, et al. Social context of neighborhood and socioeconomic status on leisure-time physical activity in a Brazilian urban center: The BH Health Study. *Cad Saude Publica* 2015;31:136-147.
23. Aquino EM, Barreto SM, Bensenor IM, et al. Brazilian Longitudinal Study of Adult Health (ELSA-Brasil): objectives and design. *Am J Epidemiol* 2012;175(4):315-324.
24. Santos SM, Chor D, Loureiro Werneck G. Demarcation of local neighborhoods to study relations between contextual factors and health. *Int J Health Geo.* 2010;9:34.
25. Instituto Brasileiro de Geografia e Estatística (IBGE). 2010 Population Census. n.d.; <https://ww2.ibge.gov.br/english/estatistica/populacao/censo2010/default.shtm>. Accessed Aug 3, 2017.
26. Sampson RJ, Raudenbush SW, Earls F. Neighborhoods and violent crime: A multilevel study of collective efficacy. *Science* 1997;277:918-924.

- 1  
2  
3 27. Mujahid MS, Diez-Roux A, Morenoff JD, Raghunathan T. Assessing the measurement  
4 properties of neighborhood scales: from psychometrics to econometrics. *Am J Epidemiol*  
5 2007;165:858-867.  
6  
7  
8  
9  
10 28. Santos SM, Griep RH, Cardoso LO, et al. Cross-cultural adaptation and reliability of  
11 measurements on self-reported neighborhood characteristics in ELSA-Brasil. *Rev Saude*  
12 *Publica*. 2013;47 Suppl 2:122-130.  
13  
14  
15  
16  
17 29. Stockdale SE, Wells KB, Tang L, Belin TR, Zhang L, Sherbourne CD. The importance of  
18 social context: Neighborhood stressors, stress-buffering mechanisms, and alcohol, drug,  
19 and mental health disorders. *Soc Sci Med* 2007;65(9):1867-1881.  
20  
21  
22  
23  
24 30. Stafford M, Chandola T, Marmot M. Association between fear of crime and mental  
25 health and physical functioning. *Am J Public Health* 2007;97(11):2076-2081.  
26  
27  
28  
29 31. Björntorp P. Do stress reactions cause abdominal obesity and comorbidities? *Obes Rev*  
30 2001;2(2):73-86.  
31  
32  
33 32. Burdette HL, Wadden TA, Whitaker RC. Neighborhood safety, collective efficacy, and  
34 obesity in women with young children. *Obesity* 2006;14(3):518-525.  
35  
36  
37  
38 33. Guilcher SJT, Kaufman-Shriqui V, Hwang J, et al. The association between social  
39 cohesion in the neighborhood and body mass index (BMI): An examination of gendered  
40 differences among urban-dwelling Canadians. *Prev Med*. 2017;99:293-298.  
41  
42  
43  
44 34. Stafford M, Cummins S, Macintyre S, Ellaway A, Marmot M. Gender differences in the  
45 associations between health and neighbourhood environment. *Soc Sci Med*  
46 2005;60(8):1681-1692.  
47  
48  
49  
50  
51  
52  
53  
54  
55  
56  
57  
58  
59  
60

- 1  
2  
3 35. Boing AF, Subramanian SV. The influence of area-level education on body mass index,  
4 waist circumference and obesity according to gender. *Int J Public Health* 2015;60:727-  
5 736.  
6  
7  
8  
9  
10 36. Derose KP, Han B, Williamson S, Cohen DA. Gender disparities in park use and physical  
11 activity among residents of high-poverty neighborhoods in Los Angeles. *Women Health*  
12 *Issues* 2018;28(1):6-13.  
13  
14  
15  
16  
17 37. Astell-Burt T, Feng X, Kolt GS, Jalaludin B. Does rising crime lead to increasing  
18 distress? Longitudinal analysis of a natural experiment with dynamic objective  
19 neighbourhood measures. *Soc Sci Med* 2015;138:68-73.  
20  
21  
22  
23  
24 38. Pereira de Castro OC, Araujo Nobre A, Ribeiro de Castro IR, Chor D, Harter Griep R, de  
25 Oliveira Cardoso L. Does context influence the Body Mass Index of Brazilian workers?  
26 Results from the ELSA-Brasil study baseline. Manuscript submitted for publication.  
27  
28  
29  
30  
31 39. Kondo MC, Andreyeva E, South EC, MacDonald JM, Branas CC. Neighborhood  
32 interventions to reduce violence. *Ann Rev Public Health* 2018;39(1):253-271.  
33  
34  
35  
36 40. Lorenc T, Clayton S, Neary D, et al. Crime, fear of crime, environment, and mental  
37 health and wellbeing: Mapping review of theories and causal pathways. *Health Place*  
38 2012;18:757-765.  
39  
40  
41  
42 41. Armstrong D. A survey of community gardens in upstate New York: Implications for  
43 health promotion and community development. *Health Place* 2000;6(4):319-327.  
44  
45  
46  
47 42. Salvo D, Sarmiento OL, Reis RS, et al. Where Latin Americans are physically active, and  
48 why does it matter? Findings from the IPEN-adult study in Bogota, Colombia;  
49 Cuernavaca, Mexico; and Curitiba, Brazil. *Prev Med.* 2017;103:S27-S33.  
50  
51  
52  
53  
54  
55  
56  
57  
58  
59  
60

- 1  
2  
3 43. Bennett T, Holloway K, Farrington DP. Does neighborhood watch reduce crime? A  
4 systematic review and meta-analysis. *J Exp Criminol* 2006;2(4):437-458.  
5  
6  
7  
8 44. Camilo de Oliveira AMH, Furlan Antigo M, Rabelo A. [Occupational typologies applied  
9 to the socioeconomic analysis of the ELSA sample]. Report for CEDEPLAR/UFMG, Jult  
10 2013.  
11  
12  
13  
14  
15 45. Schmidt MI, Duncan BB, Mill, JG, et al. Cohort profile: Longitudinal Study of Adult  
16 Health (ELSA-Brasil). *Int J Epidemiol* 2015;44:68-75.  
17  
18  
19  
20  
21  
22  
23  
24  
25  
26  
27  
28  
29  
30  
31  
32  
33  
34  
35  
36  
37  
38  
39  
40  
41  
42  
43  
44  
45  
46  
47  
48  
49  
50  
51  
52  
53  
54  
55  
56  
57  
58  
59  
60

1  
2  
3 **SUPPLEMENTARY TABLE**  
4

5 **Supplementary Table S1: Neighborhood characteristics by SES cluster (N=1902 neighborhoods where the sample lived)**  
6

7

|                                  | Low SES<br>N=753 |        |                | Intermediate SES<br>N=550 |        |                 | High SES<br>N=598 |         |                 |
|----------------------------------|------------------|--------|----------------|---------------------------|--------|-----------------|-------------------|---------|-----------------|
|                                  | Mean             | SD     | IQR            | Mean                      | SD     | IQR             | Mean              | SD      | IQR             |
| Proportion of children 0-4 years | 6.85             | 1.17   | 6.03-7.62      | 5.29                      | 0.98   | 4.62-5.90       | 3.93              | 1.04    | 3.26-4.48       |
| Number of people per household   | 3.27             | 0.19   | 3.15-3.37      | 3.02                      | 0.18   | 2.90-3.14       | 2.59              | 0.31    | 2.35-2.81       |
| % White                          | 32.11            | 15.07  | 16.31-43.10    | 59.70                     | 13.79  | 50.68-69.04     | 81.24             | 10.14   | 74.79-89.11     |
| Median income (\$R)              | 946.56           | 292.02 | 733.13-1102.92 | 1916.65                   | 750.63 | 1395.50-2209.20 | 4758.85           | 2290.00 | 3003.02-6001.70 |
| Social capital                   | 16.79            | 2.96   | 15.25-18.40    | 17.17                     | 2.62   | 16.00-18.75     | 17.45             | 1.93    | 16.40-18.62     |
| Perceived safety                 | 8.84             | 2.61   | 7.00-10.50     | 9.35                      | 2.49   | 8.00-11.00      | 9.51              | 1.96    | 8.25-10.75      |
| Perceived violence               | 15.68            | 2.53   | 14.20-17.50    | 16.71                     | 2.06   | 15.81-18.00     | 17.04             | 1.67    | 16.33-18.00     |

16

17  
18 *Abbreviations:* SES=socioeconomic status; SD=standard deviation; IQR= interquartile range

19 Note: The perceived violence scale was constructed so that a higher score indicated a lower perceived violence.  
20  
21  
22  
23  
24  
25  
26  
27  
28  
29  
30  
31  
32  
33  
34  
35  
36  
37  
38  
39  
40  
41  
42  
43  
44  
45  
46  
47

1  
2  
3  
4  
5  
6  
7  
8  
9  
10  
11  
12  
13  
14  
15  
16  
17  
18  
19  
20  
21  
22  
23  
24  
25  
26  
27  
28  
29  
30  
31  
32  
33  
34  
35  
36  
37  
38  
39  
40  
41  
42  
43  
44  
45  
46  
47  
48  
49  
50  
51  
52  
53  
54  
55  
56  
57  
58  
59  
60STROBE Statement—Checklist of items that should be included in reports of *cross-sectional studies*

|                              | Item No | Page No      | Recommendation                                                                                                                                                                                                                                                                                                                                                                                                                             |
|------------------------------|---------|--------------|--------------------------------------------------------------------------------------------------------------------------------------------------------------------------------------------------------------------------------------------------------------------------------------------------------------------------------------------------------------------------------------------------------------------------------------------|
| <b>Title and abstract</b>    | 1       | 1            | (a) Indicate the study's design with a commonly used term in the title or the abstract<br><i>The term "cohort study" is included in the title</i>                                                                                                                                                                                                                                                                                          |
|                              |         | 3            | (b) Provide in the abstract an informative and balanced summary of what was done and what was found                                                                                                                                                                                                                                                                                                                                        |
| <b>Introduction</b>          |         |              |                                                                                                                                                                                                                                                                                                                                                                                                                                            |
| Background/rationale         | 2       | 6-7          | Explain the scientific background and rationale for the investigation being reported                                                                                                                                                                                                                                                                                                                                                       |
| Objectives                   | 3       | 7            | State specific objectives, including any prespecified hypotheses                                                                                                                                                                                                                                                                                                                                                                           |
| <b>Methods</b>               |         |              |                                                                                                                                                                                                                                                                                                                                                                                                                                            |
| Study design                 | 4       | 7            | Present key elements of study design early in the paper                                                                                                                                                                                                                                                                                                                                                                                    |
| Setting                      | 5       | 7            | Describe the setting, locations, and relevant dates, including periods of recruitment, exposure, follow-up, and data collection                                                                                                                                                                                                                                                                                                            |
| Participants                 | 6       | 7            | (a) Give the eligibility criteria, and the sources and methods of selection of participants                                                                                                                                                                                                                                                                                                                                                |
| Variables                    | 7       | 8-11         | Clearly define all outcomes, exposures, predictors, potential confounders, and effect modifiers. Give diagnostic criteria, if applicable                                                                                                                                                                                                                                                                                                   |
| Data sources/<br>measurement | 8*      | 8-11         | For each variable of interest, give sources of data and details of methods of assessment (measurement). Describe comparability of assessment methods if there is more than one group                                                                                                                                                                                                                                                       |
| Bias                         | 9       | 10           | Describe any efforts to address potential sources of bias<br><i>Explained covariate adjustment to control for confounding</i>                                                                                                                                                                                                                                                                                                              |
|                              | 10      | 8            | Explain how the study size was arrived at                                                                                                                                                                                                                                                                                                                                                                                                  |
| Quantitative variables       | 11      | 8-12         | Explain how quantitative variables were handled in the analyses. If applicable, describe which groupings were chosen and why                                                                                                                                                                                                                                                                                                               |
| Statistical methods          | 12      | 11-12        | (a) Describe all statistical methods, including those used to control for confounding<br>(b) Describe any methods used to examine subgroups and interactions<br>(c) Explain how missing data were addressed<br>(d) If applicable, describe analytical methods taking account of sampling strategy<br>(e) Describe any sensitivity analyses<br><i>No sensitivity analyses done</i>                                                          |
| <b>Results</b>               |         |              |                                                                                                                                                                                                                                                                                                                                                                                                                                            |
| Participants                 | 13*     | 8            | (a) Report numbers of individuals at each stage of study—eg numbers potentially eligible, examined for eligibility, confirmed eligible, included in the study, completing follow-up, and analysed<br>(b) Give reasons for non-participation at each stage<br>(c) Consider use of a flow diagram<br><i>Authors consider this unnecessary as data collection has been explained in previous publications at length (cited in this paper)</i> |
| Descriptive data             | 14*     | 12<br>Table1 | (a) Give characteristics of study participants (eg demographic, clinical, social) and information on exposures and potential confounders<br>(b) Indicate number of participants with missing data for each variable of                                                                                                                                                                                                                     |



|                          |     |                        |                                                                                                                                                                                                                                                                                                                                                                                                                                        |
|--------------------------|-----|------------------------|----------------------------------------------------------------------------------------------------------------------------------------------------------------------------------------------------------------------------------------------------------------------------------------------------------------------------------------------------------------------------------------------------------------------------------------|
|                          |     |                        | interest                                                                                                                                                                                                                                                                                                                                                                                                                               |
|                          |     |                        | <i>WOMEN max sample = 8218 (all have age and education)</i>                                                                                                                                                                                                                                                                                                                                                                            |
|                          |     |                        | <i>8218 – 395 with missing skin color = 7823</i>                                                                                                                                                                                                                                                                                                                                                                                       |
|                          |     |                        | <i>7823 – 3 missing obesity = 7820</i>                                                                                                                                                                                                                                                                                                                                                                                                 |
|                          |     |                        | <i>7820 – 1713 missing neighborhood (and hence, all neighborhood values)</i>                                                                                                                                                                                                                                                                                                                                                           |
|                          |     |                        | <i>= 6107 → ANALYTICAL SAMPLE</i>                                                                                                                                                                                                                                                                                                                                                                                                      |
|                          |     |                        | <i>MEN max sample = 6887 (all have age and education)</i>                                                                                                                                                                                                                                                                                                                                                                              |
|                          |     |                        | <i>6887 – 320 with missing skin color = 6567</i>                                                                                                                                                                                                                                                                                                                                                                                       |
|                          |     |                        | <i>6567 – 3 missing obesity = 6564</i>                                                                                                                                                                                                                                                                                                                                                                                                 |
|                          |     |                        | <i>6564 – 1773 missing neighborhood (and hence, all neighborhood values)</i>                                                                                                                                                                                                                                                                                                                                                           |
|                          |     |                        | <i>= 4791 → ANALYTICAL SAMPLE</i>                                                                                                                                                                                                                                                                                                                                                                                                      |
| Outcome data             | 15* | 12<br>Table1           | Report numbers of outcome events or summary measures                                                                                                                                                                                                                                                                                                                                                                                   |
| Main results             | 16  | 12,13<br>Tables<br>2-5 | (a) Give unadjusted estimates and, if applicable, confounder-adjusted estimates and their precision (eg, 95% confidence interval). Make clear which confounders were adjusted for and why they were included<br>(b) Report category boundaries when continuous variables were categorized<br>(c) If relevant, consider translating estimates of relative risk into absolute risk for a meaningful time period<br><i>Not applicable</i> |
| Other analyses           | 17  | 13<br>Table5           | Report other analyses done—eg analyses of subgroups and interactions, and sensitivity analyses<br><i>Subgroups analyses are explained; no sensitivity analyses reported</i>                                                                                                                                                                                                                                                            |
| <b>Discussion</b>        |     |                        |                                                                                                                                                                                                                                                                                                                                                                                                                                        |
| Key results              | 18  | 19                     | Summarise key results with reference to study objectives                                                                                                                                                                                                                                                                                                                                                                               |
| Limitations              | 19  | 23                     | Discuss limitations of the study, taking into account sources of potential bias or imprecision. Discuss both direction and magnitude of any potential bias                                                                                                                                                                                                                                                                             |
| Interpretation           | 20  | 24                     | Give a cautious overall interpretation of results considering objectives, limitations, multiplicity of analyses, results from similar studies, and other relevant evidence                                                                                                                                                                                                                                                             |
| Generalisability         | 21  | 23                     | Discuss the generalisability (external validity) of the study results                                                                                                                                                                                                                                                                                                                                                                  |
| <b>Other information</b> |     |                        |                                                                                                                                                                                                                                                                                                                                                                                                                                        |
| Funding                  | 22  | 25                     | Give the source of funding and the role of the funders for the present study and, if applicable, for the original study on which the present article is based                                                                                                                                                                                                                                                                          |

\*Give information separately for exposed and unexposed groups.

**Note:** An Explanation and Elaboration article discusses each checklist item and gives methodological background and published examples of transparent reporting. The STROBE checklist is best used in conjunction with this article (freely available on the Web sites of PLoS Medicine at <http://www.plosmedicine.org/>, Annals of Internal Medicine at <http://www.annals.org/>, and Epidemiology at <http://www.epidem.com/>). Information on the STROBE Initiative is available at [www.strobe-statement.org](http://www.strobe-statement.org).

# BMJ Open

## The association between the neighborhood social environment and obesity in Brazil varies by gender and neighborhood socioeconomic status: a cross-sectional analysis of the ELSA-Brasil study

|                                 |                                                                                                                                                                                                                                                                                                                                                                                                                                                                                                                                                                                                                                                                                                                                                                                                                                                                                                                                                                                                                         |
|---------------------------------|-------------------------------------------------------------------------------------------------------------------------------------------------------------------------------------------------------------------------------------------------------------------------------------------------------------------------------------------------------------------------------------------------------------------------------------------------------------------------------------------------------------------------------------------------------------------------------------------------------------------------------------------------------------------------------------------------------------------------------------------------------------------------------------------------------------------------------------------------------------------------------------------------------------------------------------------------------------------------------------------------------------------------|
| Journal:                        | <i>BMJ Open</i>                                                                                                                                                                                                                                                                                                                                                                                                                                                                                                                                                                                                                                                                                                                                                                                                                                                                                                                                                                                                         |
| Manuscript ID                   | bmjopen-2018-026800.R2                                                                                                                                                                                                                                                                                                                                                                                                                                                                                                                                                                                                                                                                                                                                                                                                                                                                                                                                                                                                  |
| Article Type:                   | Research                                                                                                                                                                                                                                                                                                                                                                                                                                                                                                                                                                                                                                                                                                                                                                                                                                                                                                                                                                                                                |
| Date Submitted by the Author:   | 04-Jul-2019                                                                                                                                                                                                                                                                                                                                                                                                                                                                                                                                                                                                                                                                                                                                                                                                                                                                                                                                                                                                             |
| Complete List of Authors:       | Chaparro, M. Pia; Tulane University School of Public Health and Tropical Medicine, Global Community Health and Behavioral Sciences<br>Pina, Maria; Fundacao Oswaldo Cruz, Laboratory of Health and Environment Education; INEB - Instituto de Engenharia Biomédica, Universidade do Porto<br>Cardoso, Leticia; Fundação Oswaldo Cruz., National School of Public Health Sergio Arouca<br>Santos, Simone; Fundação Oswaldo Cruz., National School of Public Health Sergio Arouca<br>Barreto, Sandhi; Hospital das Clinicas da Universidade Federal de Minas Gerais<br>Giatti, Luana; Universidade Federal da Ouro Preto, School of Nutrition<br>Matos, Sheila Maria; Universidade Federal da Bahia, Institute of Public Health<br>Mendes da Fonseca, Maria ; Fundacao Oswaldo Cruz, National School of Public Health Sergio Arouca<br>Chor, Dora; Oswaldo Cruz Foundation-National School of Public Health, Epidemiology<br>Griep, Rosane Haerter; Fundacao Oswaldo Cruz, Laboratory of Health and Environment Education |
| <b>Primary Subject Heading</b>: | Global health                                                                                                                                                                                                                                                                                                                                                                                                                                                                                                                                                                                                                                                                                                                                                                                                                                                                                                                                                                                                           |
| Secondary Subject Heading:      | Nutrition and metabolism                                                                                                                                                                                                                                                                                                                                                                                                                                                                                                                                                                                                                                                                                                                                                                                                                                                                                                                                                                                                |
| Keywords:                       | obesity, neighborhood, Brazil, social environment                                                                                                                                                                                                                                                                                                                                                                                                                                                                                                                                                                                                                                                                                                                                                                                                                                                                                                                                                                       |
|                                 |                                                                                                                                                                                                                                                                                                                                                                                                                                                                                                                                                                                                                                                                                                                                                                                                                                                                                                                                                                                                                         |

SCHOLARONE™  
Manuscripts

1  
2  
3 **The association between the neighborhood social environment and obesity in Brazil varies**  
4 **by gender and neighborhood socioeconomic status: a cross-sectional analysis of the ELSA-**  
5 **Brasil study**  
6  
7  
8  
9

10  
11  
12 M. Pia Chaparro,<sup>1</sup> M. Fatima Pina,<sup>2-4</sup> Leticia de Oliveira Cardoso,<sup>5</sup> Simone M. Santos,<sup>5</sup> Sandhi  
13  
14 Maria Barreto,<sup>6</sup> Luana Giatti Gonçalves,<sup>7</sup> Sheila M. Alvim de Matos,<sup>8</sup> Maria de Jesus Mendes da  
15  
16 Fonseca,<sup>5</sup> Dóra Chor,<sup>5</sup> Rosane H. Griep<sup>2</sup>  
17  
18  
19  
20

21 <sup>1</sup>Department of Global Community Health and Behavioral Sciences, School of Public Health and  
22  
23 Tropical Medicine, Tulane University, New Orleans, LA, USA.  
24  
25

26 <sup>2</sup>Laboratory of Health and Environment Education, Oswaldo Cruz Institute, Fundação Oswaldo  
27  
28 Cruz, Manguinhos, Rio de Janeiro, Brazil.  
29  
30

31 <sup>3</sup>Institute of Biomedical Engineering (INEB), University of Porto, Porto, Portugal.  
32

33 <sup>4</sup>Institute of Research and Innovation in Health (i3s), University of Porto, Porto, Portugal.  
34

35 <sup>5</sup>National School of Public Health Sergio Arouca, Fundação Oswaldo Cruz, Rio de Janeiro,  
36  
37 Brazil.  
38  
39

40 <sup>6</sup>Medical School & Hospital das Clínicas, Federal University of Minas Gerais, Belo Horizonte,  
41  
42 Minas Gerais, Brazil.  
43  
44

45 <sup>7</sup>School of Nutrition, Federal University of Ouro Preto, Ouro Preto, Minas Gerais, Brazil.  
46

47 <sup>8</sup>Institute of Public Health, Federal University of Bahia, Salvador, Brazil.  
48  
49  
50  
51  
52  
53  
54  
55  
56  
57  
58  
59  
60

1  
2  
3 **Corresponding author:** M. Pia Chaparro, MS, PhD (corresponding author)  
4  
5 Department of Global Community Health and Behavioral Sciences  
6  
7 School of Public Health and Tropical Medicine  
8  
9 Tulane University  
10  
11 1440 Canal St., suite 2200-16, mail code #8319  
12  
13 New Orleans, LA 70112  
14  
15 Tel. (504) 988-4533  
16  
17 Email: [pchaparro@tulane.edu](mailto:pchaparro@tulane.edu)  
18  
19  
20  
21  
22  
23  
24

25 **Word count:** 3916  
26

27 **Contributorship statement:** MFP, LOC, SMS, SMB, LGG, SMAM, MJMF, DC and RHG  
28  
29 were involved with data acquisition; MPC and MFP were in charge of data analysis with  
30  
31 guidance from LOC, SMS, DC, and RHG; all authors were involved in data interpretation; MPC  
32  
33 drafted the manuscript; all authors edited the manuscript and approved the final version for  
34  
35 submission. All authors take responsibility for the contents of this manuscript and agree to be  
36  
37 accountable for all aspects of the work.  
38  
39  
40  
41  
42  
43  
44  
45  
46  
47  
48  
49  
50  
51  
52  
53  
54  
55  
56  
57  
58  
59  
60

**ABSTRACT**

*Objective:* To investigate the association between the neighborhood social environment, including social cohesion, perceived neighborhood safety, perceived neighborhood violence, and obesity in Brazil.

*Design:* Cross-sectional study.

*Setting:* 6 state capitals in Brazil (Salvador, Vitoria, Belo Horizonte, Porto Alegre, Sao Paulo, and Rio de Janeiro)

*Participants:* Current or former employees of 5 federal universities and 1 research center in each of the 6 Brazilian state capitals who were participants of the baseline wave (2008-2010) of the Brazilian Longitudinal Study of Adult Health (N=11,456; 56% women; 56% White, 28% Brown, and 16% Black).

*Primary outcome measure:* Obesity, based on measured weight and height, and defined as having a body mass index (BMI)  $\geq 30\text{kg/m}^2$ .

*Results:* No associations were found between the neighborhood social environment and obesity among men. In multilevel logistic regression models adjusted for age, education, skin color, state of residence, and individual-level social cohesion and perceived violence scores, respectively, women living in the least socially cohesive neighborhoods and in those perceived as most violent had higher odds of obesity compared to their counterparts (OR=1.25, 95%CI=1.02-1.53; OR=1.28, 95%CI=1.04-1.56, respectively). When stratified by neighborhood SES – defined based on number of people per household, proportion of children 0-4 years, median income, and percent of white residents at the neighborhood level – results for social cohesion and for violence remained only for women residing in high SES and low SES neighborhoods, respectively.

1  
2  
3 *Conclusions:* In this civil-servant sample in 6 large cities in Brazil, the neighborhood social  
4 environment was associated with obesity among women, but not men. Neighborhood-level  
5 interventions to increase social cohesion and reduce violence may help in the prevention of  
6 obesity among women in Brazil.  
7  
8  
9  
10  
11  
12  
13  
14  
15  
16  
17  
18  
19  
20  
21  
22  
23  
24  
25  
26  
27  
28  
29  
30  
31  
32  
33  
34  
35  
36  
37  
38  
39  
40  
41  
42  
43  
44  
45  
46  
47  
48  
49  
50  
51  
52  
53  
54  
55  
56  
57  
58  
59  
60

For peer review only

### STRENGTHS AND LIMITATIONS OF THE STUDY

- This is one of the first studies investigating the association between the neighborhood social environment and obesity in Latin America
- The sample comes from a well-defined cohort study in six large and diverse cities in Brazil, using validated questionnaires and scales, as well as measured weight and height
- This study is based on civil-servants, which excludes the extremely poor and unemployed, limiting generalizability

## INTRODUCTION

Research on neighborhoods and their influence on obesity focus on the physical environment, including the food and physical activity environments, as well as the social environment,<sup>1,2</sup> which refers to the social interactions (or lack thereof) that occur in the neighborhood between neighbors. The social environment includes concepts like social cohesion and social ties, as well as exposure to crime and violence, all of which have been linked to obesity.<sup>3,4</sup> Neighborhood social cohesion is hypothesized to work as a buffer for stress and, as such, to be protective of obesity,<sup>5</sup> whereas neighborhood crime and violence may affect the likelihood of outdoor physical activity<sup>6-8</sup> and, through this mechanism, be detrimental for obesity. Given the hypothesized link between neighborhoods and obesity, neighborhood-level interventions may be effective ways of influencing individual weight-related behaviors and thus preventing obesity.<sup>9</sup>

To date most evidence linking neighborhoods and obesity come from high-income countries, with still a limited amount of evidence available for low- and middle-income countries like those in Latin America.<sup>10</sup> This is despite the exponential increase in obesity observed in the region in the past two decades, and the widespread search for effective ways to curb the epidemic.<sup>11,12</sup> In Brazil, for example, obesity among women has increased from 12.1% in 2006 to 19.6% in 2016, and for men the corresponding numbers are 11.4% and 18.1%.<sup>13</sup> Research in Latin America has mostly focused on the food and physical activity environments,<sup>14-18</sup> with fewer studies assessing the neighborhood social environment as it pertains to obesity. Of those studying the social environment, most focus on neighborhood safety/crime. For example, neighborhood rates of homicides have been linked to obesity in Cali, Colombia<sup>19</sup> and Belo Horizonte, Brazil,<sup>20</sup> whereas perceiving one's neighborhood as unsafe was associated with decreased physical activity in Curitiba, Brazil,<sup>6</sup> Sao Paulo, Brazil,<sup>21</sup> and Florianopolis, Brazil.<sup>7</sup>



1  
2  
3 To our knowledge, no studies in Latin America have looked into neighborhood social  
4 interactions – measured by social cohesion or social ties – and obesity,<sup>4</sup> but a study in Belo  
5 Horizonte, Brazil found that neighborhood social cohesion was positively associated with  
6 physical activity.<sup>22</sup>  
7  
8  
9  
10  
11

12 To fill-in such gaps in the literature and taking advantage of a rich and georeferenced  
13 dataset based on six large cities in Brazil, the aim of this study was to investigate if the  
14 neighborhood social environment – including social cohesion, perceived safety and violence –  
15 was associated with obesity among Brazilian adults, and to identify if this association varied by  
16 gender. Previous studies have found that social neighborhood characteristics are associated with  
17 obesity<sup>5-8,19,20</sup> and that neighborhood environments affect women more than men;<sup>23,24</sup> therefore,  
18 we hypothesized that the neighborhood social environment will be associated with obesity  
19 among Brazilian adults, particularly among women. Furthermore, we hypothesized that lower  
20 neighborhood socioeconomic status (SES) could modify individuals' perceptions of their  
21 neighborhood environment and, thus, influence obesity-related behaviors. Therefore, we also  
22 assessed if the association between the neighborhood social environment and obesity varied by  
23 neighborhood SES.  
24  
25  
26  
27  
28  
29  
30  
31  
32  
33  
34  
35  
36  
37  
38  
39  
40  
41

## 42 **METHODS**

43  
44 Data comes from the baseline of the Brazilian Longitudinal Study of Adult Health (ELSA-  
45 Brasil), a multicenter cohort study designed to investigate the incidence and progression of  
46 cardiovascular disease and diabetes, as well as the biological, social, and environmental  
47 determinants of these conditions in the Brazilian population.<sup>25</sup> ELSA-Brasil data are collected  
48  
49  
50  
51  
52  
53  
54  
55  
56  
57  
58  
59  
60

1  
2  
3 among active and retired employees from universities/research centers located in six Brazilian  
4 state capitals: Salvador, Vitoria, Belo Horizonte, Porto Alegre, Sao Paulo, and Rio de Janeiro.<sup>25</sup>  
5  
6

7  
8 Detailed data collection procedures are found elsewhere.<sup>25</sup> Briefly, participants were  
9 recruited via on-site and radio announcements, mailings, billboards, and phone calls. Eligible  
10 participants were also recruited using a list of employees stratified by age, gender, and  
11  
12 occupation to ensure representativeness in key sub-groups. Baseline data collection occurred in  
13  
14 2008-2010, with a total sample of 15,105 (54% women), ages 35 to 74 years. Data collected  
15  
16 relevant to the current study include measured weight and height, sociodemographic information  
17  
18 (age, gender, educational attainment, self-reported skin color), and perceptions about  
19  
20 participants' neighborhood.  
21  
22  
23  
24  
25

26 Participants' residential addresses were georeferenced at the census tract level. In Brazil,  
27 existing tracts used for census data collection are heterogenous in terms of size and composition;  
28 they are often too small to capture the collective social processes we are set to investigate, while  
29 also proving problematic for statistical analysis.<sup>26</sup> Therefore, neighborhoods were constructed by  
30 combining contiguous census tracts with similar sociodemographic composition based on four  
31 variables from the Brazilian Census 2010:<sup>27</sup> number of people per household, proportion of  
32 children 0-4 years, mean income, and percent of white residents, following an adaptation of the  
33 methodology described by Santos et al. (2010).<sup>26</sup> In their study, Santos et al. (2010)<sup>26</sup> utilized a  
34 spatial aggregation method based on SKATER (Spatial 'K'luster Analysis by Tree Edge  
35 Removal at TerraView software) to create clusters of contiguous census tracts based on the same  
36 sociodemographic characteristics listed above but with educational attainment instead of percent  
37 of white residents, as available in the Brazilian Census 2000.<sup>26</sup> The Brazilian Census 2010 did  
38  
39  
40  
41  
42  
43  
44  
45  
46  
47  
48  
49  
50  
51  
52  
53  
54  
55  
56  
57  
58  
59  
60

1  
2  
3 not include questions regarding education,<sup>27</sup> so percent of white residents was chosen as an  
4  
5 adequate replacement variable based on principal component analysis.  
6

7  
8 Neighborhoods were defined with a minimum population size of 5,000 inhabitants, a  
9  
10 number deemed appropriate to be able to distinguish between different socioeconomic patterns.

11  
12 <sup>26</sup> Our sample includes 11,456 individuals with complete data and valid neighborhood  
13  
14 definitions, corresponding to 76% of the ELSA-Brasil participants; this sample lived in 1902  
15  
16 neighborhoods, with a mean population of 6.02 individuals per neighborhood (SD 9.82;  
17  
18 median=3; min-max=1-139).  
19

20  
21 ELSA-Brasil research protocol was approved by the Research Ethics Committees of São  
22  
23 Paulo University, Minas Gerais Federal University, Fundação Oswaldo Cruz, Espírito Santo  
24  
25 Federal University, Bahia Federal University, Rio Grande do Sul Federal University, and the  
26  
27 National Research Ethics Committee.  
28  
29

30  
31 The outcome of this study was obesity, defined as having a body mass index (BMI)>30  
32  
33 kg/m<sup>2</sup>, based on measured weight and height. Our exposure variables were self-reported  
34  
35 measures of the neighborhood social environment, including social cohesion, perceived safety,  
36  
37 and perceived violence. The three scales used to measure social cohesion, perceived safety, and  
38  
39 perceived violence were cross-culturally adapted from existing validated ones,<sup>28,29</sup> including a  
40  
41 translation and back-translation from English to Portuguese.<sup>30</sup> Test-retest reliability was assessed  
42  
43 in a sub-sample of ELSA-Brasil participants to evaluate internal consistency and temporal  
44  
45 stability of the measurements; the scales were found to have good internal consistency (assessed  
46  
47 with Cronbach's alpha: 0.60 for social cohesion, 0.67 for perceived safety, 0.71 for perceived  
48  
49 violence) and very good reproducibility (assessed with intraclass correlation coefficients: 0.83  
50  
51 for social cohesion, 0.86 for perceived safety, 0.87 for perceived violence).<sup>30</sup> There was a low  
52  
53  
54  
55  
56  
57  
58  
59  
60

1  
2  
3 correlation between the social cohesion and the perceived safety (Pearson correlation coefficient  
4 [CC]=0.24) and the perceived violence (CC=0.26) scales in our sample, and a moderate  
5  
6 correlation between the perceived safety and perceived violence scales (CC=0.46). Correlation  
7  
8 coefficients were similar for women and men.  
9  
10

11  
12  
13 Social cohesion, defined as the willingness of neighbors to intervene for the good of the  
14 community,<sup>28</sup> was assessed with a 5-item scale: 1) this is a close-knit neighborhood; 2) people  
15 around here are willing to help their neighbors; 3) people in this neighborhood don't get along  
16 with each other; 4) people in this neighborhood do not share the same values; and 5) people in  
17 this neighborhood can be trusted. Participants were asked their agreement level for these items  
18 using a 5-point Likert scale ranging from 1="completely agree" to 5="completely disagree,"  
19 with scores ranging from 5-25. Reverse coding was used as needed so that a higher score  
20 indicated a higher social cohesion.  
21  
22  
23  
24  
25  
26  
27  
28  
29  
30

31  
32 Perceived neighborhood safety was assessed with a 3-item scale: 1) I feel safe walking in  
33 my neighborhood, day or night; 2) violence is a problem in my neighborhood; and 3) my  
34 neighborhood is safe from crime, with participants reporting their agreement level with these  
35 items following the same 5-point Likert scale as above. Individual scores ranged from 3-15.  
36  
37 Items 1 and 3 were reverse coded so that a higher score indicated a higher perceived safety.  
38  
39  
40  
41  
42  
43

44 Perceived neighborhood violence was assessed based on 5 items, referring to the previous  
45 6 months: 1) how often was there a fight in this neighborhood in which a weapon was used?; 2)  
46 how often was there a violent argument between neighbors?; 3) how often was there a gang  
47 fight?; 4) how often was there a sexual assault or rape?; and 5) how often was there a robbery or  
48 mugging?. Response options ranged from 1="frequently" to 4="never," with individual scores  
49 ranging from 5 to 20 and a higher score representing lower perceived violence. For all these  
50  
51  
52  
53  
54  
55  
56  
57  
58  
59  
60

1  
2  
3 neighborhood scales, thus, a higher score meant something positive: higher social cohesion,  
4  
5 higher perceived safety, and lower perceived violence. For all analyses, individual-level scores  
6  
7 on social cohesion, perceived safety and perceived violence were each aggregated at the  
8  
9 neighborhood level, so that all participants living in the same neighborhood would have the same  
10  
11 level of exposure. Further, neighborhood-level scores were converted into tertiles to simplify  
12  
13 interpretation as the three sets of scores followed different scales with different ranges of  
14  
15 responses. Neighborhoods were then classified as being in the lowest, middle, or highest tertile  
16  
17 of exposure for each neighborhood predictor.  
18  
19  
20  
21

22 Covariates included participants' age (continuous), gender, educational attainment (up to  
23  
24 primary, secondary, and university), and self-reported skin color (White, Brown ["mixed race"],  
25  
26 Black, Asian, and Indigenous; Asian and Indigenous were dropped from the analysis because of  
27  
28 their small sample size).  
29  
30

31 In order to classify the neighborhoods by SES, we ran a principal component analysis to  
32  
33 reduce the same four census variables used in the definition of neighborhoods into two non-  
34  
35 correlated principal components. The first component was composed of *number of people per*  
36  
37 *household* and *proportion of children 0-4 years*, whereas the second component was composed  
38  
39 of *median income* and *percent of white residents*, explaining 87% of the data variability. We  
40  
41 then forced these two principal components into three hierarchical clusters, using the Ward's  
42  
43 method, to identify groups of neighborhoods with similar characteristics. The authors' empirical  
44  
45 knowledge of the area and the interpretation of the scores of each principal component within  
46  
47 each cluster allowed for the classification of the neighborhoods into low, intermediate, and high  
48  
49 SES. Characteristics of these low, intermediate, and high SES neighborhoods are displayed in  
50  
51 Supplementary Table S1.  
52  
53  
54  
55  
56  
57  
58  
59  
60

## Patient and public involvement

Patients were not involved in the development of this study.

## Statistical analysis

Hierarchical multilevel logistic regression models were ran as individuals (level 1) were nested within neighborhoods (level 2), and the outcome variable (obesity) was dichotomous. Model 1 included our independent variable of interest (social cohesion, perceived safety, or perceived violence) and age, while Model 2 was further adjusted by gender; education; skin color; ELSA sites; an interaction term between gender and social cohesion, perceived safety, or perceived violence; as well as individual-level scores on the social cohesion, perceived safety, and perceived violence scales for the models with neighborhood social cohesion, perceived safety, and perceived violence as predictors, respectively. This latter adjustment allowed us to account for individual variations in neighborhood perceptions and to obtain neighborhood effects above and beyond individual effects. Given that gender interactions for two out of our three independent variables of interest were significant (social cohesion interaction p-value=0.0077; perceived safety p-value=0.3569; perceived violence p-value=0.0363), we re-ran all models stratified by gender.

To identify if the association between the neighborhood social environment and obesity varied by neighborhood SES, we further stratified our analysis by neighborhood SES. For these models, neighborhood-level scores of our three neighborhood variables were reconverted into tertiles *within* each neighborhood SES category. All analyses were carried out in SAS v9.4 (SAS Institute Inc., Cary, NC, USA) with a p-value<0.05 denoting statistical significance.

## RESULTS

Table 1 displays the sample characteristics for the whole sample and by obesity status. Women comprised the majority of the sample (56%); compared to men in the sample, women had a higher education and were more likely to be black. Obesity was more prevalent among women (23%) than men (20%) and among middle-aged participants (46-65 years). We observed social inequities based on education and skin color, with decreased obesity prevalence as education increased, and black participants having the highest prevalence of obesity compared to white participants (29% vs. 20%). We observed an obesity gradient for neighborhood social cohesion and perceived violence, indicating that residents of the least cohesive and most self-perceived violent neighborhoods had a higher prevalence of obesity than those in the most cohesive and least violent neighborhoods, respectively. Residents of the poorest neighborhoods had a higher obesity prevalence compared to those in the richest (26% vs. 19%).

Results of the multilevel logistic regression models predicting obesity by neighborhood social cohesion, perceived safety, and perceived violence are shown in Tables 2, 3, and 4, respectively. Neighborhood social cohesion was associated with obesity for women only, and this association remained after adjusting for age, education, skin color, and individual-level social cohesion scores. In fully adjusted models, women who lived in the least socially cohesive neighborhoods had 25% higher odds of being obese compared to women living in the most socially cohesive neighborhoods (Table 2). We observed no associations between perceived safety and obesity (Table 3). In turn, perceived violence was associated with obesity among women only: women living in the most violent neighborhoods had 28% higher odds of obesity compared to women who lived in the least violent neighborhoods, adjusting for age, education, skin color, and individual-level perceived violence scores (Table 4).

**Table 1:** Characteristics of the sub-sample of ELSA-Brasil participants included in the study, stratified by obesity status (N=11,456)

|                                                    | <b>Not obese<br/>(BMI&lt;30<br/>kg/m<sup>2</sup>)<br/>Row %</b> | <b>Obese<br/>(BMI≥30<br/>kg/m<sup>2</sup>)<br/>Row %</b> | <b>Total<br/>N (%)</b> |
|----------------------------------------------------|-----------------------------------------------------------------|----------------------------------------------------------|------------------------|
| <b>INDIVIDUAL-LEVEL VARIABLES</b>                  |                                                                 |                                                          |                        |
| <b>Gender</b>                                      |                                                                 |                                                          |                        |
| Women                                              | 76.6                                                            | 23.4                                                     | 6427 (56.1)            |
| Men                                                | 80.1                                                            | 19.9                                                     | 5025 (43.9)            |
| <b>Age group (years)</b>                           |                                                                 |                                                          |                        |
| 34-45                                              | 81.9                                                            | 18.1                                                     | 2841 (24.8)            |
| 46-55                                              | 76.9                                                            | 23.1                                                     | 4400 (38.4)            |
| 56-65                                              | 76.4                                                            | 23.6                                                     | 3077 (26.9)            |
| >65                                                | 78.5                                                            | 21.5                                                     | 1134 (9.9)             |
| <b>Education</b>                                   |                                                                 |                                                          |                        |
| Less than primary                                  | 72.0                                                            | 28.0                                                     | 522 (4.6)              |
| Primary                                            | 73.8                                                            | 26.2                                                     | 646 (5.6)              |
| Secondary                                          | 74.3                                                            | 25.7                                                     | 3543 (30.9)            |
| University                                         | 81.1                                                            | 18.9                                                     | 6741 (58.9)            |
| <b>Skin color</b>                                  |                                                                 |                                                          |                        |
| White                                              | 80.3                                                            | 19.7                                                     | 6127 (56.2)            |
| Brown                                              | 77.3                                                            | 22.7                                                     | 3052 (28.0)            |
| Black                                              | 70.6                                                            | 29.4                                                     | 1719 (15.8)            |
| <b>NEIGHBORHOOD-LEVEL VARIABLES</b>                |                                                                 |                                                          |                        |
| <b>Social cohesion (mean 17.3, SD 3.6)</b>         |                                                                 |                                                          |                        |
| Lowest tertile (range 5-16.3; mean 14.3, SD 2.0)   | 76.0                                                            | 24.0                                                     | 2156 (18.8)            |
| Middle tertile (range 16.3-18; mean 17.1, SD 0.4)  | 78.3                                                            | 21.7                                                     | 5671 (49.5)            |
| Highest tertile (range 18-25; mean 19.4, SD 1.5)   | 79.2                                                            | 20.8                                                     | 3629 (31.7)            |
| <b>Perceived safety (mean 9.5, SD 3.2)</b>         |                                                                 |                                                          |                        |
| Lowest tertile (range 3-8.4; mean 6.5, SD 7.0)     | 76.8                                                            | 23.2                                                     | 2899 (25.3)            |
| Middle tertile (range 8.4-10; mean 9.2, SD 0.4)    | 79.1                                                            | 20.9                                                     | 4648 (40.6)            |
| Highest tertile (range 10-15; mean 11.3, SD 1.3)   | 78.1                                                            | 21.9                                                     | 3909 (34.1)            |
| <b>Perceived violence (mean 16.8, SD 2.8)</b>      |                                                                 |                                                          |                        |
| Lowest tertile (range 7-16; mean 13.8, SD 1.8)     | 74.9                                                            | 25.1                                                     | 2584 (22.6)            |
| Middle tertile (range 16-17.5; mean 16.7, SD 0.5)  | 78.6                                                            | 21.4                                                     | 4783 (41.8)            |
| Highest tertile (range 17.5-20; mean 18.5, SD 0.7) | 79.7                                                            | 20.3                                                     | 4089 (35.7)            |
| <b>Neighborhood SES</b>                            |                                                                 |                                                          |                        |
| Low                                                | 74.1                                                            | 25.9                                                     | 2812 (24.6)            |
| Intermediate                                       | 76.9                                                            | 23.1                                                     | 3418 (29.8)            |
| High                                               | 81.2                                                            | 18.8                                                     | 5225 (45.6)            |



**Table 2:** Results from the multilevel logistic regression model predicting obesity (BMI $\geq$ 30 kg/m<sup>2</sup>) by neighborhood social cohesion; gender-stratified (N= 6,092 women; 4,783 men)

|                         | Model 1<br>OR (95%CI)   |                  | Model 2<br>OR (95%CI)   |                         |
|-------------------------|-------------------------|------------------|-------------------------|-------------------------|
|                         | Women                   | Men              | Women                   | Men                     |
| <b>Neighborhood</b>     |                         |                  |                         |                         |
| <b>Social cohesion</b>  |                         |                  |                         |                         |
| Lowest tertile          | <b>1.43 (1.18-1.72)</b> | 0.99 (0.81-1.21) | <b>1.25 (1.02-1.53)</b> | 0.90 (0.72-1.13)        |
| Middle tertile          | 1.14 (0.97-1.32)        | 0.96 (0.82-1.13) | 1.07 (0.92-1.26)        | 0.95 (0.80-1.13)        |
| Highest tertile         | 1.00                    | 1.00             | 1.00                    | 1.00                    |
| <b>Age</b>              | <b>1.02 (1.01-1.03)</b> | 1.00 (0.99-1.01) | <b>1.02 (1.01-1.03)</b> | 1.00 (1.00-1.01)        |
| <b>Individual-level</b> |                         |                  |                         |                         |
| <b>social cohesion</b>  |                         |                  | 1.00 (0.98-1.02)        | 0.99 (0.97-1.01)        |
| <b>Education</b>        |                         |                  |                         |                         |
| Primary or less         |                         |                  | <b>1.46 (1.16-1.83)</b> | 1.10 (0.87-1.40)        |
| Secondary               |                         |                  | <b>1.48 (1.28-1.70)</b> | 1.10 (0.92-1.30)        |
| University              |                         |                  | 1.00                    | 1.00                    |
| <b>Skin color</b>       |                         |                  |                         |                         |
| Black                   |                         |                  | <b>1.86 (1.56-2.21)</b> | <b>1.45 (1.15-1.82)</b> |
| Brown                   |                         |                  | <b>1.38 (1.18-1.62)</b> | 1.13 (0.95-1.36)        |
| White                   |                         |                  | 1.00                    | 1.00                    |
| <b>ELSA site</b>        |                         |                  |                         |                         |
| Bahia                   |                         |                  | <b>0.62 (0.50-0.76)</b> | <b>0.56 (0.44-0.72)</b> |
| Espirito Santo          |                         |                  | <b>0.70 (0.51-0.96)</b> | 0.88 (0.63-1.23)        |
| Minas Gerais            |                         |                  | <b>0.75 (0.62-0.91)</b> | 0.91 (0.74-1.11)        |
| Rio de Janeiro          |                         |                  | 0.89 (0.71-1.11)        | 1.06 (0.84-1.33)        |
| Rio Grande do Sul       |                         |                  | 0.91 (0.74-1.12)        | 0.91 (0.72-1.16)        |
| Sao Paulo               |                         |                  | 1.00                    | 1.00                    |

**Table 3:** Results from the multilevel logistic regression model predicting obesity (BMI $\geq$ 30 kg/m<sup>2</sup>) by perceived neighborhood safety; gender-stratified (N= 6,092 women; 4,783 men)

|                         | Model 1<br>OR (95%CI)   |                  | Model 2<br>OR (95%CI)   |                         |
|-------------------------|-------------------------|------------------|-------------------------|-------------------------|
|                         | Women                   | Men              | Women                   | Men                     |
| <b>Neighborhood</b>     |                         |                  |                         |                         |
| <b>Perceived safety</b> |                         |                  |                         |                         |
| Lowest tertile          | 1.16 (0.97-1.38)        | 0.98 (0.82-1.18) | 1.15 (0.95-1.39)        | 1.06 (0.86-1.30)        |
| Middle tertile          | 0.94 (0.80-1.10)        | 0.92 (0.78-1.08) | 0.96 (0.82-1.12)        | 0.98 (0.83-1.17)        |
| Highest tertile         | 1.00                    | 1.00             | 1.00                    | 1.00                    |
| <b>Age</b>              | <b>1.02 (1.01-1.03)</b> | 1.00 (0.99-1.01) | <b>1.02 (1.01-1.03)</b> | 1.00 (1.00-1.01)        |
| <b>Individual-level</b> |                         |                  |                         |                         |
| <b>perceived safety</b> |                         |                  | 0.99 (0.97-1.02)        | 1.00 (0.98-1.03)        |
| <b>Education</b>        |                         |                  |                         |                         |
| Primary or less         |                         |                  | <b>1.48 (1.18-1.86)</b> | 1.10 (0.87-1.39)        |
| Secondary               |                         |                  | <b>1.49 (1.30-1.71)</b> | 1.09 (0.92-1.30)        |
| University              |                         |                  | 1.00                    | 1.00                    |
| <b>Skin color</b>       |                         |                  |                         |                         |
| Black                   |                         |                  | <b>1.87 (1.57-2.23)</b> | <b>1.44 (1.14-1.81)</b> |
| Brown                   |                         |                  | <b>1.39 (1.19-1.63)</b> | 1.13 (0.95-1.36)        |
| White                   |                         |                  | 1.00                    | 1.00                    |
| <b>ELSA site</b>        |                         |                  |                         |                         |
| Bahia                   |                         |                  | <b>0.59 (0.48-0.73)</b> | <b>0.56 (0.43-0.72)</b> |
| Espirito Santo          |                         |                  | <b>0.66 (0.48-0.90)</b> | 0.89 (0.64-1.24)        |
| Minas Gerais            |                         |                  | <b>0.71 (0.59-0.86)</b> | 0.92 (0.75-1.12)        |
| Rio de Janeiro          |                         |                  | 0.84 (0.67-1.05)        | 1.05 (0.83-1.32)        |
| Rio Grande do Sul       |                         |                  | 0.87 (0.71-1.07)        | 0.92 (0.72-1.17)        |
| Sao Paulo               |                         |                  | 1.00                    | 1.00                    |

**Table 4:** Results from the multilevel logistic regression model predicting obesity (BMI $\geq$ 30 kg/m<sup>2</sup>) by perceived neighborhood violence; gender-stratified (N= 6,092 women; 4,783 men)

|                           | Model 1<br>OR (95%CI)   |                  | Model 2<br>OR (95%CI)   |                         |
|---------------------------|-------------------------|------------------|-------------------------|-------------------------|
|                           | Women                   | Men              | Women                   | Men                     |
| <b>Neighborhood</b>       |                         |                  |                         |                         |
| <b>Perceived violence</b> |                         |                  |                         |                         |
| Lowest tertile            | <b>1.51 (1.27-1.80)</b> | 1.08 (0.90-1.30) | <b>1.28 (1.04-1.56)</b> | 1.07 (0.86-1.34)        |
| Middle tertile            | 1.07 (0.91-1.25)        | 0.98 (0.83-1.15) | 1.03 (0.88-1.20)        | 0.99 (0.84-1.18)        |
| Highest tertile           | 1.00                    | 1.00             | 1.00                    | 1.00                    |
| <b>Age</b>                | <b>1.02 (1.01-1.03)</b> | 1.00 (0.99-1.01) | <b>1.02 (1.01-1.03)</b> | 1.00 (1.00-1.01)        |
| <b>Individual-level</b>   |                         |                  |                         |                         |
| <b>perceived violence</b> |                         |                  | 0.98 (0.96-1.00)        | 0.99 (0.96-1.02)        |
| <b>Education</b>          |                         |                  |                         |                         |
| Primary or less           |                         |                  | <b>1.42 (1.13-1.78)</b> | 1.08 (0.86-1.38)        |
| Secondary                 |                         |                  | <b>1.44 (1.25-1.66)</b> | 1.08 (0.91-1.29)        |
| University                |                         |                  | 1.00                    | 1.00                    |
| <b>Skin color</b>         |                         |                  |                         |                         |
| Black                     |                         |                  | <b>1.82 (.153-2.17)</b> | <b>1.43 (1.13-1.81)</b> |
| Brown                     |                         |                  | <b>1.37 (1.17-1.61)</b> | 1.13 (0.94-1.35)        |
| White                     |                         |                  | 1.00                    | 1.00                    |
| <b>ELSA site</b>          |                         |                  |                         |                         |
| Bahia                     |                         |                  | <b>0.56 (0.45-0.70)</b> | <b>0.54 (0.42-0.70)</b> |
| Espírito Santo            |                         |                  | <b>0.67 (0.49-0.92)</b> | 0.89 (0.64-1.23)        |
| Minas Gerais              |                         |                  | <b>0.70 (0.58-0.84)</b> | 0.92 (0.75-1.11)        |
| Rio de Janeiro            |                         |                  | 0.81 (0.65-1.02)        | 1.02 (0.81-1.29)        |
| Rio Grande do Sul         |                         |                  | 0.84 (0.68-1.03)        | 0.90 (0.71-1.15)        |
| Sao Paulo                 |                         |                  | 1.00                    | 1.00                    |

<sup>1</sup>The perceived violence scale was constructed so that a higher score indicated a lower perceived violence. Therefore, the *lowest tertile* category represents neighborhoods with the highest perceived violence.

Table 5 displays the results of the analysis stratified by neighborhood SES. For social cohesion, our results remained only among women living in high SES neighborhoods: women in the least socially cohesive neighborhoods had 48% higher odds of obesity compared to women living in the most socially cohesive neighborhoods *within high SES neighborhoods*. Oppositely, our results with perceived violence remained for women in poor neighborhoods: *within low SES neighborhoods*, women living in the most (perceived)s violent neighborhoods had almost twice the odds of obesity compared to those living in the least (perceived) violent neighborhoods. Associations also emerged in the intermediate SES category, suggesting a dose-response association between perceived violence and obesity for those in low SES neighborhoods.

**Table 5:** Results from the multilevel logistic regression model predicting obesity ( $\text{BMI} \geq 30 \text{ kg/m}^2$ ) by neighborhood social cohesion, by perceived safety, and by perceived violence independently, and stratified by neighborhood socioeconomic status (SES) and gender<sup>1</sup>

|                           | High SES<br>OR (95% CI) |                  | Intermediate SES<br>OR (95%CI) |                  | Low SES<br>OR (95%CI)   |                  |
|---------------------------|-------------------------|------------------|--------------------------------|------------------|-------------------------|------------------|
|                           | Women                   | Men              | Women                          | Men              | Women                   | Men              |
| <b>Social cohesion</b>    |                         |                  |                                |                  |                         |                  |
| N                         | 2799                    | 2144             | 1882                           | 1371             | 1410                    | 1268             |
| Lowest tertile            | <b>1.48 (1.10-1.99)</b> | 1.03 (0.76-1.42) | 0.86 (0.59-1.26)               | 0.95 (0.63-1.45) | 1.43 (0.98-2.10)        | 0.92 (0.59-1.44) |
| Middle tertile            | 1.06 (0.82-1.37)        | 1.05 (0.80-1.38) | 1.03 (0.77-1.37)               | 0.83 (0.59-1.16) | 0.98 (0.73-1.33)        | 0.83 (0.58-1.20) |
| Highest tertile           | 1.00                    | 1.00             | 1.00                           | 1.00             | 1.00                    | 1.00             |
| <b>Perceived safety</b>   |                         |                  |                                |                  |                         |                  |
| N                         | 2797                    | 2144             | 1881                           | 1371             | 1408                    | 1268             |
| Lowest tertile            | 1.09 (0.80-1.48)        | 1.01 (0.73-1.40) | 0.81 (0.57-1.16)               | 1.11 (0.74-1.66) | 1.38 (0.93-2.02)        | 1.19 (0.76-1.86) |
| Middle tertile            | 1.00 (0.77-1.30)        | 0.87 (0.66-1.14) | 0.84 (0.63-1.13)               | 0.98 (0.70-1.37) | 1.27 (0.94-1.71)        | 0.99 (0.69-1.43) |
| Highest tertile           | 1.00                    | 1.00             | 1.00                           | 1.00             | 1.00                    | 1.00             |
| <b>Perceived violence</b> |                         |                  |                                |                  |                         |                  |
| N                         | 2792                    | 2134             | 1873                           | 1369             | 1406                    | 1267             |
| Lowest tertile            | 1.00 (0.73-1.37)        | 1.21 (0.85-1.72) | 1.22 (0.84-1.76)               | 1.03 (0.68-1.56) | <b>1.92 (1.28-2.90)</b> | 1.02 (0.63-1.66) |
| Middle tertile            | 0.87 (0.67-1.12)        | 1.08 (0.83-1.40) | 1.01 (0.75-1.38)               | 0.86 (0.60-1.22) | <b>1.70 (1.23-2.34)</b> | 1.03 (0.72-1.49) |
| Highest tertile           | 1.00                    | 1.00             | 1.00                           | 1.00             | 1.00                    | 1.00             |

<sup>1</sup>All models adjusted by age, education, skin color, ELSA site, as well as by individual-level social cohesion, perceived safety, and perceived violence scores for the neighborhood social cohesion, perceived safety, and perceived violence models, respectively.

<sup>2</sup>The perceived violence scale was constructed so that a higher score indicated a lower perceived violence. Therefore, the *lowest tertile* category represents neighborhoods with the highest perceived violence.

## DISCUSSION

In this study based on a civil-servant sample of adults living in six large cities in Brazil, we found that living in a neighborhood with low social cohesion and high levels of self-perceived violence was associated with higher odds of obesity among women but not men. After stratifying by neighborhood SES, the association between living in the least socially cohesive neighborhoods and obesity remained only among women living in high SES neighborhoods, whereas the association between living in the most (perceived) violent neighborhoods and obesity remained only for women residing in low SES neighborhoods.

Studies in Latin America<sup>19,20</sup> and elsewhere<sup>8</sup> also report an association between neighborhood violence and obesity among adults. The hypothesized mechanisms involved are a reduction in outdoor physical activity, related to the fear of being outdoors, as well as the direct stress caused by living in an unsafe neighborhood. There is support for both hypotheses in the literature, as neighborhood crime/violence is associated with a decreased physical activity,<sup>6-8</sup> and also with an increase in stress and a worse mental health.<sup>31,32</sup> Chronic stress, in turn, has been linked to an increased obesity risk due to its influence on weight-related behaviors and by dysregulating the hypothalamic-pituitary-adrenal axis, leading to abdominal fat deposition.<sup>33</sup>

There are mixed results in relation to neighborhood social cohesion and obesity in high-income countries,<sup>5,23,34</sup> though most studies have found protective effects.<sup>4</sup> As far as the authors know, no previous studies have looked at this association in Latin America. Similar to our findings, Cohen et al. (2006) found that residents of neighborhoods with lower collective efficacy – a concept highly linked to social cohesion – had higher BMIs in Los Angeles, CA, U.S.<sup>5</sup> Burdette et al. (2006), in turn, found no such association among women living in 20 U.S. cities.<sup>34</sup>

1  
2  
3 Social cohesion is hypothesized to act as a buffer from neighborhood-related stress and,  
4 through this mechanism, be protective of obesity.<sup>5</sup> Cohen et al. (2006) also suggest that adults in  
5 neighborhoods with higher social cohesion may be willing to intervene in aspects of the  
6 neighborhood that influence weight-related behaviors; for example, setting up sports leagues or  
7 influencing local food stores to carry healthier offerings.<sup>5</sup> However, the opposite can also be true,  
8 with residents in high-social-cohesion neighborhoods uniting for negative things as they pertain  
9 to obesity, for example, standing against soda taxation or against bans of unhealthy vending  
10 machines.<sup>4</sup>  
11  
12  
13  
14  
15  
16  
17  
18  
19  
20  
21

22 We found that neighborhood social cohesion and perceived violence only influences the  
23 obesity risk of Brazilian women and not men. This finding that women are more affected by their  
24 neighborhood environment, particularly the social one, is not new.<sup>24,35,36</sup> Rech et al. 2012 found  
25 that perception of safety during the day was associated with leisure walking among women but  
26 not men among a convenience sample of adults in Curitiba, Brazil.<sup>6</sup> Similarly, a study in Los  
27 Angeles, CA, U.S. found that women living in high-poverty neighborhoods exercised less than  
28 men, partly due to safety concerns associated with accessing outdoor parks.<sup>36</sup> Moreover,  
29 Guilcher et al. (2017) found that a higher neighborhood social cohesion was associated with  
30 lower odds of obesity only among women in a sample of adults in Toronto, Canada.<sup>23</sup> Reasons  
31 why neighborhood effects may be stronger for women than men include differences in their  
32 neighborhood perceptions (which is not the case in our sample), an increased exposure (i.e.  
33 women spending more time in their residential neighborhoods), or an increased vulnerability (i.e.  
34 women being more impacted by their surroundings).<sup>24</sup> Further, women are more often victims of  
35 sexual violence than men,<sup>3,8</sup> and this may influence the time they spend outdoors – and hence  
36  
37  
38  
39  
40  
41  
42  
43  
44  
45  
46  
47  
48  
49  
50  
51  
52  
53  
54  
55  
56  
57  
58  
59  
60

1  
2  
3 their physical activity levels – as well as their stress levels, particularly among women in low  
4  
5 SES neighborhoods.  
6

7  
8 A previous study conducted in the south of Brazil found neighborhood-level variations in  
9  
10 obesity prevalence for both men and women; however, neighborhood-level education was only  
11  
12 associated with obesity among women in the sample.<sup>37</sup> Another study using ELSA-Brasil data  
13  
14 found that the food and physical activity neighborhood environments were associated with  
15  
16 obesity among women but not men.<sup>38</sup> The results of these studies and our own suggest that the  
17  
18 neighborhood environment may matter for men's obesity risk, but the neighborhood factors  
19  
20 studied to date are relevant only for women. Future studies should further investigate which  
21  
22 neighborhood factors, if any, affect obesity risk among men in Brazil and other Latin American  
23  
24 settings, as well as the reason why neighborhood factors may affect women's and men's obesity  
25  
26 risk differently.  
27  
28  
29  
30  
31

32 Finally, we found that the effect of social cohesion and perceived violence on obesity  
33  
34 among women varied by neighborhood SES. Two studies of the neighborhood social  
35  
36 environments in Brazil have found differential effects of these neighborhood variables on  
37  
38 physical activity by *individual*-level SES. Andrade et al. (2015) reports a positive association  
39  
40 between social cohesion and physical activity only among low-SES individuals in Belo  
41  
42 Horizonte, Brazil.<sup>22</sup> This contradicts our findings that a lower social cohesion was associated  
43  
44 with a higher obesity risk among women living in high-SES neighborhoods. In turn, Rech et al.  
45  
46 (2012) found that negative associations between safety perceptions and physical inactivity in  
47  
48 Curitiba, Brazil were only present among high-SES individuals.<sup>6</sup> We found that perceived  
49  
50 neighborhood violence increased obesity risk among women in low-SES neighborhoods only.  
51  
52  
53  
54  
55  
56  
57  
58  
59  
60

1  
2  
3 Even though we found minimal variations in perceived violence scores by neighborhood  
4 SES in our sample (Supplementary Table S1), women living in low SES neighborhoods may be  
5 more impacted by their perceived neighborhood violence than those living in high SES  
6 neighborhoods. For example, residents of high SES neighborhoods may be more likely to have  
7 cars and access (monetary and physical) to indoor places for exercising (e.g. gyms). This would  
8 mean that high-SES neighborhood residents could more effectively avoid spending time  
9 outdoors in their neighborhoods without this having a severe impact on their physical activity  
10 behaviors and/or stress, the suggested mechanisms linking perceived violence and obesity.  
11 Scores of neighborhood social cohesion are also similar in our sample across neighborhood SES  
12 categories (Supplementary Table S1). Why social cohesion would be associated with obesity  
13 only among women residing in high-SES neighborhoods requires further investigation.  
14  
15  
16  
17  
18  
19  
20  
21  
22  
23  
24  
25  
26  
27  
28

29 Our results suggest that neighborhood interventions to increase social cohesion and  
30 decrease violence perceptions may prevent obesity among women in Brazil. Effective  
31 neighborhood interventions designed to reduce violence may include the cleaning and greening  
32 of vacant lots, as well as the reduction of alcohol availability.<sup>39</sup> Though the effect of these kinds  
33 of interventions on *perceived* violence is unknown, research suggests that *fear of crime* may be  
34 negatively influenced by neglected and run-down neighborhood spaces.<sup>40</sup> The greening of vacant  
35 lots may also work at increasing social cohesion and social interactions, based on evidence  
36 available from public gardening research.<sup>41</sup> Increasing access to safe public spaces may also help  
37 increase social cohesion and thus *may* decrease obesity risk. Salvo et al.,<sup>42</sup> for example, found  
38 that residents of Bogota, Colombia and Cuernavaca, Mexico reported shopping malls and  
39 nightclubs as places where they engaged in physical activity with friends, highlighting that  
40 public places that allow for social interactions may be important for weight-related behaviors.  
41  
42  
43  
44  
45  
46  
47  
48  
49  
50  
51  
52  
53  
54  
55  
56  
57  
58  
59  
60



1  
2  
3 Another option to potentially increase neighborhood trust and thus social cohesion while  
4 reducing crime is instituting neighborhood watches.<sup>43</sup> It can be argued, however, that  
5 participating in neighborhood watches may increase crime awareness and, thus, have a  
6 counteractive effect.<sup>40</sup>  
7  
8  
9  
10  
11  
12  
13  
14

### 15 **Strengths and limitations**

16  
17 This study is based on civil-servants in six large cities in Brazil; therefore, our sample excludes  
18 the extremely poor and unemployed and so our results may only be generalizable to Brazilian  
19 adults with stable employment. However, the ELSA-Brasil sample is diverse in terms of  
20 sociodemographic characteristics, including diverse regions within Brazil. Moreover, whereas  
21 the ELSA-Brasil sample has, on average, a higher income and social class than the residents of  
22 the six included cities,<sup>27,44</sup> the ELSA-Brasil sample has a similar prevalence of obesity and  
23 obesity-related behaviors (i.e. diet and physical activity patterns) than the Brazilian population at  
24 large.<sup>45</sup>  
25  
26  
27  
28  
29  
30  
31  
32  
33  
34  
35  
36

37 Data collection was based on validated questionnaires and scales, as well as direct body  
38 measurements which allowed us to estimate obesity based on measured weight and height as  
39 opposed to self-reports. The neighborhood social environment variables, however, are all self-  
40 reported and we did not have access to objective measures of crime/violence in the  
41 neighborhood. Moreover, we aggregated individual-level scores from the social cohesion,  
42 perceived safety, and perceived violence scales to the neighborhood level so that all participants  
43 in the same neighborhood would have the same level of exposure. While this is standard  
44 procedure for the use of these scales,<sup>28,29</sup> the aggregate values are based only on the ELSA-Brasil  
45 sample and not on a representative sample of neighborhood residents. Another limitation  
46  
47  
48  
49  
50  
51  
52  
53  
54  
55  
56  
57  
58  
59  
60

1  
2  
3 includes the cross-sectional design, which prevents us from establishing the directionality of the  
4  
5 associations. While some researchers question the validity of associating neighborhood-level  
6  
7 variables with health outcomes due to people self-selecting into neighborhoods,<sup>46</sup> the ELSA-  
8  
9 Brasil population is highly stable, with an average length of residence in their current  
10  
11 neighborhood of 15 years.  
12  
13  
14  
15  
16  
17

## 18 **CONCLUSIONS**

19  
20  
21 To our knowledge, this is one of the few studies in Latin America examining the association  
22  
23 between the neighborhood social environment and obesity, providing key insights into the  
24  
25 likelihood of success of neighborhood-level interventions addressing obesity in the Brazilian  
26  
27 context, in particular. Our results suggest that an increase in neighborhood social cohesion and a  
28  
29 reduction in the perception of neighborhood violence may be protective of obesity among  
30  
31 Brazilian women, with the latter particularly true for women living in poor neighborhoods.  
32  
33  
34 Further research is needed to test some of the proposed interventions in Brazil and other Latin  
35  
36 American countries, with an aim to strengthen existing communities while improving the  
37  
38 public's health. Future research should also clarify the reasons why the neighborhood social  
39  
40 environment in both high and low- and middle-income countries seem to affect women more  
41  
42 than men.  
43  
44  
45  
46  
47  
48  
49  
50  
51  
52  
53  
54  
55  
56  
57  
58  
59  
60

## ACKNOWLEDGEMENTS

We thank all ELSA-Brasil participants for their invaluable contribution to this study.

## DATA SHARING

The data used in this study are available for research proposals on request to the ELSA's Datacenter and to the ELSA's Publications Committee (publiELSA). Additional information can be obtained from the ELSA's Datacenter ([estatisticaelsa@ufrgs.br](mailto:estatisticaelsa@ufrgs.br)) and from the ELSA Coordinator from the Research Center of Rio de Janeiro ([rohgriep@ioc.fiocruz.br](mailto:rohgriep@ioc.fiocruz.br)).

## DISCLOSURE

The authors declared no conflict of interest.

## FUNDING

This study was funded by the Brazilian Ministry of Health (Department of Science and Technology) and the Brazilian Ministry of Science, Technology and Innovation (FINEP, Financiadora de Estudos e Projetos and CNPq, National Research Council), Grant No 01 06 0010.00, 01 06 0212.00, 01 06 0300.00, 01 06 0278.00, 01 06 0115.00 and 01 06 0071.00. DC, LG, RHG, SMB, and SMAM are research fellows of the National Research Council (CNPq). DC, LOC, and RHG are supported by a research grant (*Cientistas do Nosso Estado*) from the *Fundação de Amparo à Pesquisa do Estado do Rio de Janeiro - FAPERJ*, Brazil. MPC received a COR Research Fellowship from the Tulane University Senate Committee on Research and the Tulane Provost's Office, which funded her travels to Brazil.

**REFERENCES**

1. Diez-Roux AV, Mair C. Neighborhoods and health. *Ann NY Acad Sci* 2010;1186(1):125-145.
2. Gee GC, Payne-Sturges DC. Environmental health disparities: a framework integrating psychosocial and environmental concepts. *Environ Health Perspect* 2004;112(17):1645-1653.
3. Suglia SF, Shelton RC, Hsiao A, Wang YC, Rundle A, Link BG. Why the neighborhood social environment is critical in obesity prevention. *J Urban Health* 2016;93(1):206-212.
4. Carrillo-Alvarez E, Kawachi I, Riera-Romani J. Neighbourhood social capital and obesity: a systematic review of the literature. *Obes Rev* 2019;20:119-141.
5. Cohen DA, Finch BK, Bower A, Sastry N. Collective efficacy and obesity: The potential influence of social factors on health. *Soc Sci Med* 2006;62(3):769-778.
6. Rech CR, Reis RS, Hino AAF, et al. Neighborhood safety and physical inactivity in adults from Curitiba, Brazil. *Int J Behav Nutr Phys Act.* 2012;9(1):72.
7. Weber Corseuil M, Hallal PC, Xavier Corseuil H, Jayce Ceola Schneider I, d'Orsi E. Safety from crime and physical activity among older adults: a population-based study in Brazil. *J Environ Public Health* 2012;2012:7.
8. Yu E, Lippert Adam M. Neighborhood crime rate, weight-related behaviors, and obesity: a systematic review of the literature. *Sociol Compass* 2016;10(3):187-207.
9. Lovasi GS, Hutson MA, Guerra M, Neckerman KM. Built environments and obesity in disadvantaged populations. *Epidemiol Rev* 2009;31(1):7-20.
10. Kline L, Jones-Smith J, Miranda JJ, et al. A research agenda to guide progress on childhood obesity prevention in Latin America. *Obes Rev* 2017;18(S2):19-27.

- 1  
2  
3 11. Rivera JÁ, de Cossío TG, Pedraza LS, Aburto TC, Sánchez TG, Martorell R. Childhood  
4 and adolescent overweight and obesity in Latin America: a systematic review. *Lancet*  
5  
6 *Diab Endocrinol* 2014;2(4):321-332.  
7
- 8  
9  
10 12. Pérez-Escamilla R, Lutter CK, Rabadan-Diehl C, et al. Prevention of childhood obesity  
11 and food policies in Latin America: from research to practice. *Obes Rev* 2017;18(S2):28-  
12  
13 38.  
14
- 15  
16 13. Brazilian Ministry of Health, 2017. [VIGITEL Brasil 2016. Habits of Brazilians affect  
17 the growth in obesity and the increased prevalence of diabetes and hypertension];  
18  
19 <http://portalarquivos.saude.gov.br/images/pdf/2017/abril/17/Vigitel.pdf>. Accessed  
20  
21 February 15, 2019.  
22  
23
- 24  
25 14. Molina M, Serván-Mori E, Quezada AD, Colchero MA. Is there a link between  
26 availability of food and beverage establishments and BMI in Mexican adults? *Public*  
27  
28 *Health Nutr* 2017;20(18):3326-3332.  
29  
30
- 31  
32 15. Chor D, Cardoso LO, Nobre AA, et al. Association between perceived neighbourhood  
33 characteristics, physical activity and diet quality: results of the Brazilian Longitudinal  
34  
35 Study of Adult Health (ELSA-Brasil). *BMC Public Health*. 2016;16:751.  
36  
37
- 38  
39 16. Hino AAF, Rech CR, Gonçalves PB, Reis R. Perceived neighborhood environment and  
40 leisure time physical activity among adults from Curitiba, Brazil. *Rev Bras Cineantropom*  
41  
42 *Desempenho Hum* 2017;19:596-607.  
43  
44
- 45  
46 17. Mendonça G, Florindo AA, Rech CR, de Freitas DKS, de Farias Júnior JC. Perceived  
47 neighborhood environmental characteristics and different types of physical activity  
48  
49 among Brazilian adolescents. *J Sport Sci* 2018;36(9):1068-1075.  
50  
51  
52  
53  
54  
55  
56  
57  
58  
59  
60

18. Gómez LF, Parra DC, Buchner D, et al. Built environment attributes and walking patterns among the elderly population in Bogota. *Am J Prev Med.* 2010;38(6):592-599.
19. Martinez L, Prada S, Estrada D. Homicides, public goods, and population health in the context of high urban violence rates in Cali, Colombia. *J Urban Health* 2018;95:391-400.
20. Mendes LL, Nogueira H, Padez C, Ferrao M, Velasquez-Melendez G. Individual and environmental factors associated for overweight in urban population of Brazil. *BMC Public Health* 2013;13:988-988.
21. Florindo AA, Salvador EP, Reis RS, Guimarães VV. Perception of the environment and practice of physical activity by adults in a low socioeconomic area. *Rev Saude Publica* 2011;45:302-310.
22. Andrade ACdS, Peixoto SV, Friche AAdL, et al. Social context of neighborhood and socioeconomic status on leisure-time physical activity in a Brazilian urban center: The BH Health Study. *Cad Saude Publica* 2015;31:136-147.
23. Guilcher SJT, Kaufman-Shriqui V, Hwang J, et al. The association between social cohesion in the neighborhood and body mass index (BMI): An examination of gendered differences among urban-dwelling Canadians. *Prev Med.* 2017;99:293-298.
24. Stafford M, Cummins S, Macintyre S, Ellaway A, Marmot M. Gender differences in the associations between health and neighbourhood environment. *Soc Sci Med* 2005;60(8):1681-1692.
25. Aquino EM, Barreto SM, Bensenor IM, et al. Brazilian Longitudinal Study of Adult Health (ELSA-Brasil): objectives and design. *Am J Epidemiol* 2012;175(4):315-324.
26. Santos SM, Chor D, Loureiro Werneck G. Demarcation of local neighborhoods to study relations between contextual factors and health. *Int J Health Geo.* 2010;9:34.

- 1  
2  
3 27. Instituto Brasileiro de Geografia e Estatística (IBGE). 2010 Population Census. n.d.;  
4  
5 <https://ww2.ibge.gov.br/english/estatistica/populacao/censo2010/default.shtm>. Accessed  
6  
7 Aug 3, 2017.  
8  
9
- 10 28. Sampson RJ, Raudenbush SW, Earls F. Neighborhoods and violent crime: A multilevel  
11  
12 study of collective efficacy. *Science* 1997;277:918-924.  
13
- 14 29. Mujahid MS, Diez-Roux A, Morenoff JD, Raghunathan T. Assessing the measurement  
15  
16 properties of neighborhood scales: from psychometrics to econometrics. *Am J Epidemiol*  
17  
18 2007;165:858-867.  
19
- 20 30. Santos SM, Griep RH, Cardoso LO, et al. Cross-cultural adaptation and reliability of  
21  
22 measurements on self-reported neighborhood characteristics in ELSA-Brasil. *Rev Saude*  
23  
24 *Publica*. 2013;47 Suppl 2:122-130.  
25  
26
- 27 31. Stockdale SE, Wells KB, Tang L, Belin TR, Zhang L, Sherbourne CD. The importance of  
28  
29 social context: Neighborhood stressors, stress-buffering mechanisms, and alcohol, drug,  
30  
31 and mental health disorders. *Soc Sci Med* 2007;65(9):1867-1881.  
32  
33
- 34 32. Stafford M, Chandola T, Marmot M. Association between fear of crime and mental  
35  
36 health and physical functioning. *Am J Public Health* 2007;97(11):2076-2081.  
37  
38
- 39 33. Björntorp P. Do stress reactions cause abdominal obesity and comorbidities? *Obes Rev*  
40  
41 2001;2(2):73-86.  
42  
43
- 44 34. Burdette HL, Wadden TA, Whitaker RC. Neighborhood safety, collective efficacy, and  
45  
46 obesity in women with young children. *Obesity* 2006;14(3):518-525.  
47  
48  
49  
50  
51  
52  
53  
54  
55  
56  
57  
58  
59  
60

- 1  
2  
3 35. Boing AF, Subramanian SV. The influence of area-level education on body mass index,  
4 waist circumference and obesity according to gender. *Int J Public Health* 2015;60:727-  
5 736.  
6  
7  
8  
9  
10 36. Derose KP, Han B, Williamson S, Cohen DA. Gender disparities in park use and physical  
11 activity among residents of high-poverty neighborhoods in Los Angeles. *Women Health*  
12 *Issues* 2018;28(1):6-13.  
13  
14  
15  
16  
17 37. Astell-Burt T, Feng X, Kolt GS, Jalaludin B. Does rising crime lead to increasing  
18 distress? Longitudinal analysis of a natural experiment with dynamic objective  
19 neighbourhood measures. *Soc Sci Med* 2015;138:68-73.  
20  
21  
22  
23  
24 38. Pereira de Castro OC, Araujo Nobre A, Ribeiro de Castro IR, Chor D, Harter Griep R, de  
25 Oliveira Cardoso L. Does context influence the Body Mass Index of Brazilian workers?  
26 Results from the ELSA-Brasil study baseline. Manuscript submitted for publication.  
27  
28  
29  
30  
31 39. Kondo MC, Andreyeva E, South EC, MacDonald JM, Branas CC. Neighborhood  
32 interventions to reduce violence. *Ann Rev Public Health* 2018;39(1):253-271.  
33  
34  
35  
36 40. Lorenc T, Clayton S, Neary D, et al. Crime, fear of crime, environment, and mental  
37 health and wellbeing: Mapping review of theories and causal pathways. *Health Place*  
38 2012;18:757-765.  
39  
40  
41  
42 41. Armstrong D. A survey of community gardens in upstate New York: Implications for  
43 health promotion and community development. *Health Place* 2000;6(4):319-327.  
44  
45  
46  
47 42. Salvo D, Sarmiento OL, Reis RS, et al. Where Latin Americans are physically active, and  
48 why does it matter? Findings from the IPEN-adult study in Bogota, Colombia;  
49 Cuernavaca, Mexico; and Curitiba, Brazil. *Prev Med.* 2017;103:S27-S33.  
50  
51  
52  
53  
54  
55  
56  
57  
58  
59  
60



- 1  
2  
3 43. Bennett T, Holloway K, Farrington DP. Does neighborhood watch reduce crime? A  
4  
5 systematic review and meta-analysis. *J Exp Criminol* 2006;2(4):437-458.  
6  
7  
8 44. Camilo de Oliveira AMH, Furlan Antigo M, Rabelo A. [Occupational typologies applied  
9  
10 to the socioeconomic analysis of the ELSA sample]. Report for CEDEPLAR/UFMG, Jult  
11  
12 2013.  
13  
14  
15 45. Schmidt MI, Duncan BB, Mill, JG, et al. Cohort profile: Longitudinal Study of Adult  
16  
17 Health (ELSA-Brasil). *Int J Epidemiol* 2015;44:68-75.  
18  
19  
20 46. Hedman L, van Ham M. *Understanding neighbourhood effects: Selection bias and*  
21  
22 *residential mobility*. In: van Ham M, Manley D, Bailey N, Simpson L, Maclennan D,  
23  
24 editors. *Neighbourhood effects research: New perspectives*. Springer, 2012. (pg. 79-99).  
25  
26  
27  
28  
29  
30  
31  
32  
33  
34  
35  
36  
37  
38  
39  
40  
41  
42  
43  
44  
45  
46  
47  
48  
49  
50  
51  
52  
53  
54  
55  
56  
57  
58  
59  
60

1  
2  
3 **SUPPLEMENTARY TABLE**  
4

5 **Supplementary Table S1: Neighborhood characteristics by SES cluster (N=1902 neighborhoods where the sample lived)**  
6

7

|                                  | Low SES<br>N=753 |        |                | Intermediate SES<br>N=550 |        |                 | High SES<br>N=598 |         |                 |
|----------------------------------|------------------|--------|----------------|---------------------------|--------|-----------------|-------------------|---------|-----------------|
|                                  | Mean             | SD     | IQR            | Mean                      | SD     | IQR             | Mean              | SD      | IQR             |
| Proportion of children 0-4 years | 6.85             | 1.17   | 6.03-7.62      | 5.29                      | 0.98   | 4.62-5.90       | 3.93              | 1.04    | 3.26-4.48       |
| Number of people per household   | 3.27             | 0.19   | 3.15-3.37      | 3.02                      | 0.18   | 2.90-3.14       | 2.59              | 0.31    | 2.35-2.81       |
| % White                          | 32.11            | 15.07  | 16.31-43.10    | 59.70                     | 13.79  | 50.68-69.04     | 81.24             | 10.14   | 74.79-89.11     |
| Median income (\$R)              | 946.56           | 292.02 | 733.13-1102.92 | 1916.65                   | 750.63 | 1395.50-2209.20 | 4758.85           | 2290.00 | 3003.02-6001.70 |
| Social capital                   | 16.79            | 2.96   | 15.25-18.40    | 17.17                     | 2.62   | 16.00-18.75     | 17.45             | 1.93    | 16.40-18.62     |
| Perceived safety                 | 8.84             | 2.61   | 7.00-10.50     | 9.35                      | 2.49   | 8.00-11.00      | 9.51              | 1.96    | 8.25-10.75      |
| Perceived violence               | 15.68            | 2.53   | 14.20-17.50    | 16.71                     | 2.06   | 15.81-18.00     | 17.04             | 1.67    | 16.33-18.00     |

16

17  
18 *Abbreviations:* SES=socioeconomic status; SD=standard deviation; IQR= interquartile range

19 Note: The perceived violence scale was constructed so that a higher score indicated a lower perceived violence.  
20  
21  
22  
23  
24  
25  
26  
27  
28  
29  
30  
31  
32  
33  
34  
35  
36  
37  
38  
39  
40  
41  
42  
43  
44  
45  
46  
47

1  
2  
3  
4  
5  
6  
7  
8  
9  
10  
11  
12  
13  
14  
15  
16  
17  
18  
19  
20  
21  
22  
23  
24  
25  
26  
27  
28  
29  
30  
31  
32  
33  
34  
35  
36  
37  
38  
39  
40  
41  
42  
43  
44  
45  
46  
47  
48  
49  
50  
51  
52  
53  
54  
55  
56  
57  
58  
59  
60STROBE Statement—Checklist of items that should be included in reports of *cross-sectional studies*

|                              | Item No | Page No      | Recommendation                                                                                                                                                                                                                                                                                                                                                                                                                             |
|------------------------------|---------|--------------|--------------------------------------------------------------------------------------------------------------------------------------------------------------------------------------------------------------------------------------------------------------------------------------------------------------------------------------------------------------------------------------------------------------------------------------------|
| <b>Title and abstract</b>    | 1       | 1            | (a) Indicate the study's design with a commonly used term in the title or the abstract<br><i>The term "cohort study" is included in the title</i>                                                                                                                                                                                                                                                                                          |
|                              |         | 3            | (b) Provide in the abstract an informative and balanced summary of what was done and what was found                                                                                                                                                                                                                                                                                                                                        |
| <b>Introduction</b>          |         |              |                                                                                                                                                                                                                                                                                                                                                                                                                                            |
| Background/rationale         | 2       | 6-7          | Explain the scientific background and rationale for the investigation being reported                                                                                                                                                                                                                                                                                                                                                       |
| Objectives                   | 3       | 7            | State specific objectives, including any prespecified hypotheses                                                                                                                                                                                                                                                                                                                                                                           |
| <b>Methods</b>               |         |              |                                                                                                                                                                                                                                                                                                                                                                                                                                            |
| Study design                 | 4       | 7            | Present key elements of study design early in the paper                                                                                                                                                                                                                                                                                                                                                                                    |
| Setting                      | 5       | 7            | Describe the setting, locations, and relevant dates, including periods of recruitment, exposure, follow-up, and data collection                                                                                                                                                                                                                                                                                                            |
| Participants                 | 6       | 7            | (a) Give the eligibility criteria, and the sources and methods of selection of participants                                                                                                                                                                                                                                                                                                                                                |
| Variables                    | 7       | 8-11         | Clearly define all outcomes, exposures, predictors, potential confounders, and effect modifiers. Give diagnostic criteria, if applicable                                                                                                                                                                                                                                                                                                   |
| Data sources/<br>measurement | 8*      | 8-11         | For each variable of interest, give sources of data and details of methods of assessment (measurement). Describe comparability of assessment methods if there is more than one group                                                                                                                                                                                                                                                       |
| Bias                         | 9       | 10           | Describe any efforts to address potential sources of bias<br><i>Explained covariate adjustment to control for confounding</i>                                                                                                                                                                                                                                                                                                              |
|                              | 10      | 8            | Explain how the study size was arrived at                                                                                                                                                                                                                                                                                                                                                                                                  |
| Quantitative variables       | 11      | 8-12         | Explain how quantitative variables were handled in the analyses. If applicable, describe which groupings were chosen and why                                                                                                                                                                                                                                                                                                               |
| Statistical methods          | 12      | 11-12        | (a) Describe all statistical methods, including those used to control for confounding<br>(b) Describe any methods used to examine subgroups and interactions<br>(c) Explain how missing data were addressed<br>(d) If applicable, describe analytical methods taking account of sampling strategy<br>(e) Describe any sensitivity analyses<br><i>No sensitivity analyses done</i>                                                          |
| <b>Results</b>               |         |              |                                                                                                                                                                                                                                                                                                                                                                                                                                            |
| Participants                 | 13*     | 8            | (a) Report numbers of individuals at each stage of study—eg numbers potentially eligible, examined for eligibility, confirmed eligible, included in the study, completing follow-up, and analysed<br>(b) Give reasons for non-participation at each stage<br>(c) Consider use of a flow diagram<br><i>Authors consider this unnecessary as data collection has been explained in previous publications at length (cited in this paper)</i> |
| Descriptive data             | 14*     | 12<br>Table1 | (a) Give characteristics of study participants (eg demographic, clinical, social) and information on exposures and potential confounders<br>(b) Indicate number of participants with missing data for each variable of                                                                                                                                                                                                                     |

|                          |     |                        |                                                                                                                                                                                                                                                                                                                                                                                                                                        |
|--------------------------|-----|------------------------|----------------------------------------------------------------------------------------------------------------------------------------------------------------------------------------------------------------------------------------------------------------------------------------------------------------------------------------------------------------------------------------------------------------------------------------|
|                          |     |                        | interest                                                                                                                                                                                                                                                                                                                                                                                                                               |
|                          |     |                        | <i>WOMEN max sample = 8218 (all have age and education)</i>                                                                                                                                                                                                                                                                                                                                                                            |
|                          |     |                        | <i>8218 – 395 with missing skin color = 7823</i>                                                                                                                                                                                                                                                                                                                                                                                       |
|                          |     |                        | <i>7823 – 3 missing obesity = 7820</i>                                                                                                                                                                                                                                                                                                                                                                                                 |
|                          |     |                        | <i>7820 – 1713 missing neighborhood (and hence, all neighborhood values)</i>                                                                                                                                                                                                                                                                                                                                                           |
|                          |     |                        | <i>= 6107 → ANALYTICAL SAMPLE</i>                                                                                                                                                                                                                                                                                                                                                                                                      |
|                          |     |                        | <i>MEN max sample = 6887 (all have age and education)</i>                                                                                                                                                                                                                                                                                                                                                                              |
|                          |     |                        | <i>6887 – 320 with missing skin color = 6567</i>                                                                                                                                                                                                                                                                                                                                                                                       |
|                          |     |                        | <i>6567 – 3 missing obesity = 6564</i>                                                                                                                                                                                                                                                                                                                                                                                                 |
|                          |     |                        | <i>6564 – 1773 missing neighborhood (and hence, all neighborhood values)</i>                                                                                                                                                                                                                                                                                                                                                           |
|                          |     |                        | <i>= 4791 → ANALYTICAL SAMPLE</i>                                                                                                                                                                                                                                                                                                                                                                                                      |
| Outcome data             | 15* | 12<br>Table1           | Report numbers of outcome events or summary measures                                                                                                                                                                                                                                                                                                                                                                                   |
| Main results             | 16  | 12,13<br>Tables<br>2-5 | (a) Give unadjusted estimates and, if applicable, confounder-adjusted estimates and their precision (eg, 95% confidence interval). Make clear which confounders were adjusted for and why they were included<br>(b) Report category boundaries when continuous variables were categorized<br>(c) If relevant, consider translating estimates of relative risk into absolute risk for a meaningful time period<br><i>Not applicable</i> |
| Other analyses           | 17  | 13<br>Table5           | Report other analyses done—eg analyses of subgroups and interactions, and sensitivity analyses<br><i>Subgroups analyses are explained; no sensitivity analyses reported</i>                                                                                                                                                                                                                                                            |
| <b>Discussion</b>        |     |                        |                                                                                                                                                                                                                                                                                                                                                                                                                                        |
| Key results              | 18  | 19                     | Summarise key results with reference to study objectives                                                                                                                                                                                                                                                                                                                                                                               |
| Limitations              | 19  | 23                     | Discuss limitations of the study, taking into account sources of potential bias or imprecision. Discuss both direction and magnitude of any potential bias                                                                                                                                                                                                                                                                             |
| Interpretation           | 20  | 24                     | Give a cautious overall interpretation of results considering objectives, limitations, multiplicity of analyses, results from similar studies, and other relevant evidence                                                                                                                                                                                                                                                             |
| Generalisability         | 21  | 23                     | Discuss the generalisability (external validity) of the study results                                                                                                                                                                                                                                                                                                                                                                  |
| <b>Other information</b> |     |                        |                                                                                                                                                                                                                                                                                                                                                                                                                                        |
| Funding                  | 22  | 25                     | Give the source of funding and the role of the funders for the present study and, if applicable, for the original study on which the present article is based                                                                                                                                                                                                                                                                          |

\*Give information separately for exposed and unexposed groups.

**Note:** An Explanation and Elaboration article discusses each checklist item and gives methodological background and published examples of transparent reporting. The STROBE checklist is best used in conjunction with this article (freely available on the Web sites of PLoS Medicine at <http://www.plosmedicine.org/>, Annals of Internal Medicine at <http://www.annals.org/>, and Epidemiology at <http://www.epidem.com/>). Information on the STROBE Initiative is available at [www.strobe-statement.org](http://www.strobe-statement.org).

# BMJ Open

## The association between the neighborhood social environment and obesity in Brazil: a cross-sectional analysis of the ELSA-Brasil study

|                                 |                                                                                                                                                                                                                                                                                                                                                                                                                                                                                                                                                                                                                                                                                                                                                                                                                                                                                                                                                                                                                         |
|---------------------------------|-------------------------------------------------------------------------------------------------------------------------------------------------------------------------------------------------------------------------------------------------------------------------------------------------------------------------------------------------------------------------------------------------------------------------------------------------------------------------------------------------------------------------------------------------------------------------------------------------------------------------------------------------------------------------------------------------------------------------------------------------------------------------------------------------------------------------------------------------------------------------------------------------------------------------------------------------------------------------------------------------------------------------|
| Journal:                        | <i>BMJ Open</i>                                                                                                                                                                                                                                                                                                                                                                                                                                                                                                                                                                                                                                                                                                                                                                                                                                                                                                                                                                                                         |
| Manuscript ID                   | bmjopen-2018-026800.R3                                                                                                                                                                                                                                                                                                                                                                                                                                                                                                                                                                                                                                                                                                                                                                                                                                                                                                                                                                                                  |
| Article Type:                   | Research                                                                                                                                                                                                                                                                                                                                                                                                                                                                                                                                                                                                                                                                                                                                                                                                                                                                                                                                                                                                                |
| Date Submitted by the Author:   | 09-Aug-2019                                                                                                                                                                                                                                                                                                                                                                                                                                                                                                                                                                                                                                                                                                                                                                                                                                                                                                                                                                                                             |
| Complete List of Authors:       | Chaparro, M. Pia; Tulane University School of Public Health and Tropical Medicine, Global Community Health and Behavioral Sciences<br>Pina, Maria; Fundacao Oswaldo Cruz, Laboratory of Health and Environment Education; INEB - Instituto de Engenharia Biomédica, Universidade do Porto<br>Cardoso, Letícia; Fundação Oswaldo Cruz., National School of Public Health Sergio Arouca<br>Santos, Simone; Fundação Oswaldo Cruz., National School of Public Health Sergio Arouca<br>Barreto, Sandhi; Hospital das Clinicas da Universidade Federal de Minas Gerais<br>Giatti, Luana; Universidade Federal da Ouro Preto, School of Nutrition<br>Matos, Sheila Maria; Universidade Federal da Bahia, Institute of Public Health<br>Mendes da Fonseca, Maria ; Fundacao Oswaldo Cruz, National School of Public Health Sergio Arouca<br>Chor, Dora; Oswaldo Cruz Foundation-National School of Public Health, Epidemiology<br>Griep, Rosane Haerter; Fundacao Oswaldo Cruz, Laboratory of Health and Environment Education |
| <b>Primary Subject Heading</b>: | Global health                                                                                                                                                                                                                                                                                                                                                                                                                                                                                                                                                                                                                                                                                                                                                                                                                                                                                                                                                                                                           |
| Secondary Subject Heading:      | Nutrition and metabolism                                                                                                                                                                                                                                                                                                                                                                                                                                                                                                                                                                                                                                                                                                                                                                                                                                                                                                                                                                                                |
| Keywords:                       | obesity, neighborhood, Brazil, social environment                                                                                                                                                                                                                                                                                                                                                                                                                                                                                                                                                                                                                                                                                                                                                                                                                                                                                                                                                                       |
|                                 |                                                                                                                                                                                                                                                                                                                                                                                                                                                                                                                                                                                                                                                                                                                                                                                                                                                                                                                                                                                                                         |

SCHOLARONE™  
Manuscripts

1  
2  
3 **The association between the neighborhood social environment and obesity in Brazil: a**  
4 **cross-sectional analysis of the ELSA-Brasil study**  
5  
6  
7  
8  
9

10 M. Pia Chaparro,<sup>1</sup> M. Fatima Pina,<sup>2-4</sup> Leticia de Oliveira Cardoso,<sup>5</sup> Simone M. Santos,<sup>5</sup> Sandhi  
11 Maria Barreto,<sup>6</sup> Luana Giatti Gonçalves,<sup>7</sup> Sheila M. Alvim de Matos,<sup>8</sup> Maria de Jesus Mendes da  
12 Fonseca,<sup>5</sup> Dóra Chor,<sup>5</sup> Rosane H. Griep<sup>2</sup>  
13  
14  
15  
16  
17  
18

19 <sup>1</sup>Department of Global Community Health and Behavioral Sciences, School of Public Health and  
20 Tropical Medicine, Tulane University, New Orleans, LA, USA.  
21  
22

23 <sup>2</sup>Laboratory of Health and Environment Education, Oswaldo Cruz Institute, Fundação Oswaldo  
24 Cruz, Manguinhos, Rio de Janeiro, Brazil.  
25  
26  
27

28 <sup>3</sup>Institute of Biomedical Engineering (INEB), University of Porto, Porto, Portugal.  
29

30 <sup>4</sup>Institute of Research and Innovation in Health (i3s), University of Porto, Porto, Portugal.  
31  
32

33 <sup>5</sup>National School of Public Health Sergio Arouca, Fundação Oswaldo Cruz, Rio de Janeiro,  
34 Brazil.  
35  
36

37 <sup>6</sup>Medical School & Hospital das Clínicas, Federal University of Minas Gerais, Belo Horizonte,  
38 Minas Gerais, Brazil.  
39  
40

41 <sup>7</sup>School of Nutrition, Federal University of Ouro Preto, Ouro Preto, Minas Gerais, Brazil.  
42  
43

44 <sup>8</sup>Institute of Public Health, Federal University of Bahia, Salvador, Brazil.  
45  
46  
47  
48  
49  
50  
51  
52  
53  
54  
55  
56  
57  
58  
59  
60

1  
2  
3 **Corresponding author:** M. Pia Chaparro, MS, PhD (corresponding author)  
4  
5 Department of Global Community Health and Behavioral Sciences  
6  
7 School of Public Health and Tropical Medicine  
8  
9 Tulane University  
10  
11 1440 Canal St., suite 2200-16, mail code #8319  
12  
13 New Orleans, LA 70112  
14  
15 Tel. (504) 988-4533  
16  
17 Email: [pchaparro@tulane.edu](mailto:pchaparro@tulane.edu)  
18  
19  
20  
21  
22  
23  
24

25 **Word count:** 4015  
26

27 **Contributorship statement:** MFP, LOC, SMS, SMB, LGG, SMAM, MJMF, DC and RHG  
28  
29 were involved with data acquisition; MPC and MFP were in charge of data analysis with  
30  
31 guidance from LOC, SMS, DC, and RHG; all authors were involved in data interpretation; MPC  
32  
33 drafted the manuscript; all authors edited the manuscript and approved the final version for  
34  
35 submission. All authors take responsibility for the contents of this manuscript and agree to be  
36  
37 accountable for all aspects of the work.  
38  
39  
40  
41  
42  
43  
44  
45  
46  
47  
48  
49  
50  
51  
52  
53  
54  
55  
56  
57  
58  
59  
60

## ABSTRACT

*Objective:* To investigate the association between the neighborhood social environment, including social cohesion, perceived neighborhood safety, perceived neighborhood violence, and obesity in Brazil.

*Design:* Cross-sectional study.

*Setting:* 6 state capitals in Brazil (Salvador, Vitoria, Belo Horizonte, Porto Alegre, Sao Paulo, and Rio de Janeiro)

*Participants:* Current or former employees of 5 federal universities and 1 research center in each of the 6 Brazilian state capitals who were participants of the baseline wave (2008-2010) of the Brazilian Longitudinal Study of Adult Health (N=11,456; 56% women; 56% White, 28% Brown, and 16% Black).

*Primary outcome measure:* Obesity, based on measured weight and height, and defined as having a body mass index (BMI)  $\geq 30\text{kg/m}^2$ .

*Results:* No associations were found between the neighborhood social environment and obesity among men. In multilevel logistic regression models adjusted for age, education, skin color, state of residence, and individual-level social cohesion and perceived violence scores, respectively, women living in the least socially cohesive neighborhoods and in those perceived as most violent had higher odds of obesity compared to their counterparts (OR=1.25, 95%CI=1.02-1.53; OR=1.28, 95%CI=1.04-1.56, respectively). When stratified by neighborhood SES – defined based on number of people per household, proportion of children 0-4 years, median income, and percent of white residents at the neighborhood level – results for social cohesion and for violence remained only for women residing in high SES and low SES neighborhoods, respectively.



1  
2  
3 *Conclusions:* In this civil-servant sample in 6 large cities in Brazil, the neighborhood social  
4 environment was associated with obesity among women, but not men. Neighborhood-level  
5 interventions to increase social cohesion and reduce violence may help in the prevention of  
6 obesity among women in Brazil.  
7  
8  
9  
10  
11  
12  
13  
14  
15  
16  
17  
18  
19  
20  
21  
22  
23  
24  
25  
26  
27  
28  
29  
30  
31  
32  
33  
34  
35  
36  
37  
38  
39  
40  
41  
42  
43  
44  
45  
46  
47  
48  
49  
50  
51  
52  
53  
54  
55  
56  
57  
58  
59  
60

For peer review only

### STRENGTHS AND LIMITATIONS OF THE STUDY

- This is one of the first studies investigating the association between the neighborhood social environment and obesity in Latin America
- The sample comes from a well-defined cohort study in six large and diverse cities in Brazil, using validated questionnaires and scales, as well as measured weight and height
- This study is based on civil-servants, which excludes the extremely poor and unemployed, limiting generalizability

## INTRODUCTION

Research on neighborhoods and their influence on obesity focus on the physical environment, including the food and physical activity environments, as well as the social environment,<sup>1,2</sup> which refers to the social interactions (or lack thereof) that occur in the neighborhood between neighbors. The social environment includes concepts like social cohesion and social ties, as well as exposure to crime and violence, all of which have been linked to obesity.<sup>3,4</sup> Neighborhood social cohesion is hypothesized to work as a buffer for stress and, as such, to be protective of obesity,<sup>5</sup> whereas neighborhood crime and violence may affect the likelihood of outdoor physical activity<sup>6-8</sup> and, through this mechanism, be detrimental for obesity. Given the hypothesized link between neighborhoods and obesity, neighborhood-level interventions may be effective ways of influencing individual weight-related behaviors and thus preventing obesity.<sup>9</sup>

To date most evidence linking neighborhoods and obesity come from high-income countries, with still a limited amount of evidence available for low- and middle-income countries like those in Latin America.<sup>10</sup> This is despite the exponential increase in obesity observed in the region in the past two decades, and the widespread search for effective ways to curb the epidemic.<sup>11,12</sup> In Brazil, for example, obesity among women has increased from 12.1% in 2006 to 19.6% in 2016, and for men the corresponding numbers are 11.4% and 18.1%.<sup>13</sup> Research in Latin America has mostly focused on the food and physical activity environments,<sup>14-18</sup> with fewer studies assessing the neighborhood social environment as it pertains to obesity. Of those studying the social environment, most focus on neighborhood safety/crime. For example, neighborhood rates of homicides have been linked to obesity in Cali, Colombia<sup>19</sup> and Belo Horizonte, Brazil,<sup>20</sup> whereas perceiving one's neighborhood as unsafe was associated with decreased physical activity in Curitiba, Brazil,<sup>6</sup> Sao Paulo, Brazil,<sup>21</sup> and Florianopolis, Brazil.<sup>7</sup>

1  
2  
3 To our knowledge, no studies in Latin America have looked into neighborhood social  
4 interactions – measured by social cohesion or social ties – and obesity,<sup>4</sup> but a study in Belo  
5 Horizonte, Brazil found that neighborhood social cohesion was positively associated with  
6 physical activity.<sup>22</sup>  
7  
8  
9  
10  
11

12 To fill-in such gaps in the literature and taking advantage of a rich and georeferenced  
13 dataset based on six large cities in Brazil, the aim of this study was to investigate if the  
14 neighborhood social environment – including social cohesion, perceived safety and violence –  
15 was associated with obesity among Brazilian adults, and to identify if this association varied by  
16 gender. Previous studies have found that social neighborhood characteristics are associated with  
17 obesity<sup>5-8,19,20</sup> and that neighborhood environments affect women more than men;<sup>23,24</sup> therefore,  
18 we hypothesized that the neighborhood social environment will be associated with obesity  
19 among Brazilian adults, particularly among women. Furthermore, we hypothesized that lower  
20 neighborhood socioeconomic status (SES) could modify individuals' perceptions of their  
21 neighborhood environment and, thus, influence obesity-related behaviors. Therefore, we also  
22 assessed if the association between the neighborhood social environment and obesity varied by  
23 neighborhood SES.  
24  
25  
26  
27  
28  
29  
30  
31  
32  
33  
34  
35  
36  
37  
38  
39  
40  
41

## 42 **METHODS**

43  
44 Data comes from the baseline of the Brazilian Longitudinal Study of Adult Health (ELSA-  
45 Brasil), a multicenter cohort study designed to investigate the incidence and progression of  
46 cardiovascular disease and diabetes, as well as the biological, social, and environmental  
47 determinants of these conditions in the Brazilian population.<sup>25</sup> ELSA-Brasil data are collected  
48  
49  
50  
51  
52  
53  
54  
55  
56  
57  
58  
59  
60

1  
2  
3 among active and retired employees from universities/research centers located in six Brazilian  
4 state capitals: Salvador, Vitoria, Belo Horizonte, Porto Alegre, Sao Paulo, and Rio de Janeiro.<sup>25</sup>  
5  
6

7  
8 Detailed data collection procedures are found elsewhere.<sup>25</sup> Briefly, participants were  
9 recruited via on-site and radio announcements, mailings, billboards, and phone calls. Eligible  
10 participants were also recruited using a list of employees stratified by age, gender, and  
11  
12 occupation to ensure representativeness in key sub-groups. Baseline data collection occurred in  
13  
14 2008-2010, with a total sample of 15,105 (54% women), ages 35 to 74 years. Data collected  
15  
16 relevant to the current study include measured weight and height, sociodemographic information  
17  
18 (age, gender, educational attainment, self-reported skin color), and perceptions about  
19  
20 participants' neighborhood.  
21  
22  
23  
24  
25

26 Participants' residential addresses were georeferenced at the census tract level. In Brazil,  
27 existing tracts used for census data collection are heterogenous in terms of size and composition;  
28 they are often too small to capture the collective social processes we are set to investigate, while  
29 also proving problematic for statistical analysis.<sup>26</sup> Therefore, neighborhoods were constructed by  
30 combining contiguous census tracts with similar sociodemographic composition based on four  
31 variables from the Brazilian Census 2010:<sup>27</sup> number of people per household, proportion of  
32 children 0-4 years, mean income, and percent of white residents, following an adaptation of the  
33 methodology described by Santos et al. (2010).<sup>26</sup> In their study, Santos et al. (2010)<sup>26</sup> utilized a  
34 spatial aggregation method based on SKATER (Spatial 'K'luster Analysis by Tree Edge  
35 Removal at TerraView software) to create clusters of contiguous census tracts based on the same  
36 sociodemographic characteristics listed above but with educational attainment instead of percent  
37 of white residents, as available in the Brazilian Census 2000.<sup>26</sup> The Brazilian Census 2010 did  
38  
39  
40  
41  
42  
43  
44  
45  
46  
47  
48  
49  
50  
51  
52  
53  
54  
55  
56  
57  
58  
59  
60

1  
2  
3 not include questions regarding education,<sup>27</sup> so percent of white residents was chosen as an  
4  
5 adequate replacement variable based on principal component analysis.  
6

7  
8 Neighborhoods were defined with a minimum population size of 5,000 inhabitants, a  
9  
10 number deemed appropriate to be able to distinguish between different socioeconomic patterns.

11  
12 <sup>26</sup> Our sample includes 11,456 individuals with complete data and valid neighborhood  
13  
14 definitions, corresponding to 76% of the ELSA-Brasil participants; this sample lived in 1902  
15  
16 neighborhoods, with a mean population of 6.02 individuals per neighborhood (SD 9.82;  
17  
18 median=3; min-max=1-139).  
19

20  
21 ELSA-Brasil research protocol was approved by the Research Ethics Committees of São  
22  
23 Paulo University, Minas Gerais Federal University, Fundação Oswaldo Cruz, Espírito Santo  
24  
25 Federal University, Bahia Federal University, Rio Grande do Sul Federal University, and the  
26  
27 National Research Ethics Committee.  
28

29  
30 The outcome of this study was obesity, defined as having a body mass index (BMI)  $\geq 30$   
31  
32 kg/m<sup>2</sup>, based on measured weight and height. Our exposure variables were self-reported  
33  
34 measures of the neighborhood social environment, including social cohesion, perceived safety,  
35  
36 and perceived violence. The three scales used to measure social cohesion, perceived safety, and  
37  
38 perceived violence were cross-culturally adapted from existing validated ones,<sup>28,29</sup> including a  
39  
40 translation and back-translation from English to Portuguese.<sup>30</sup> Test-retest reliability was assessed  
41  
42 in a sub-sample of ELSA-Brasil participants to evaluate internal consistency and temporal  
43  
44 stability of the measurements; the scales were found to have good internal consistency (assessed  
45  
46 with Cronbach's alpha: 0.60 for social cohesion, 0.67 for perceived safety, 0.71 for perceived  
47  
48 violence) and very good reproducibility (assessed with intraclass correlation coefficients: 0.83  
49  
50 for social cohesion, 0.86 for perceived safety, 0.87 for perceived violence).<sup>30</sup> There was a low  
51  
52  
53  
54  
55  
56  
57  
58  
59  
60

1  
2  
3 correlation between the social cohesion and the perceived safety (Pearson correlation coefficient  
4 [CC]=0.24) and the perceived violence (CC=0.26) scales in our sample, and a moderate  
5  
6 correlation between the perceived safety and perceived violence scales (CC=0.46). Correlation  
7  
8 coefficients were similar for women and men.  
9  
10

11  
12  
13 Social cohesion, defined as the willingness of neighbors to intervene for the good of the  
14 community,<sup>28</sup> was assessed with a 5-item scale: 1) this is a close-knit neighborhood; 2) people  
15 around here are willing to help their neighbors; 3) people in this neighborhood don't get along  
16 with each other; 4) people in this neighborhood do not share the same values; and 5) people in  
17 this neighborhood can be trusted. Participants were asked their agreement level for these items  
18 using a 5-point Likert scale ranging from 1="completely agree" to 5="completely disagree,"  
19 with scores ranging from 5-25. Reverse coding was used as needed so that a higher score  
20 indicated a higher social cohesion.  
21  
22  
23  
24  
25  
26  
27  
28  
29  
30  
31

32 Perceived neighborhood safety was assessed with a 3-item scale: 1) I feel safe walking in  
33 my neighborhood, day or night; 2) violence is a problem in my neighborhood; and 3) my  
34 neighborhood is safe from crime, with participants reporting their agreement level with these  
35 items following the same 5-point Likert scale as above. Individual scores ranged from 3-15.  
36  
37 Items 1 and 3 were reverse coded so that a higher score indicated a higher perceived safety.  
38  
39  
40  
41  
42  
43

44 Perceived neighborhood violence was assessed based on 5 items, referring to the previous  
45 6 months: 1) how often was there a fight in this neighborhood in which a weapon was used?; 2)  
46 how often was there a violent argument between neighbors?; 3) how often was there a gang  
47 fight?; 4) how often was there a sexual assault or rape?; and 5) how often was there a robbery or  
48 mugging?. Response options ranged from 1="frequently" to 4="never," with individual scores  
49 ranging from 5 to 20 and a higher score representing lower perceived violence. For all these  
50  
51  
52  
53  
54  
55  
56  
57  
58  
59  
60

1  
2  
3 neighborhood scales, thus, a higher score meant something positive: higher social cohesion,  
4  
5 higher perceived safety, and lower perceived violence. These three scales were designed to  
6  
7 measure aggregate contextual characteristics; therefore, individual-level scores on social  
8  
9 cohesion, perceived safety and perceived violence were each aggregated at the neighborhood  
10  
11 level, so that all participants living in the same neighborhood would have the same level of  
12  
13 exposure. Further, neighborhood-level scores were converted into tertiles to simplify  
14  
15 interpretation as the three sets of scores followed different scales with different ranges of  
16  
17 responses. Neighborhoods were then classified as being in the lowest, middle, or highest tertile  
18  
19 of exposure for each neighborhood predictor.  
20  
21  
22  
23

24  
25 Covariates included participants' age (continuous), gender, educational attainment (up to  
26  
27 primary, secondary, and university), and self-reported skin color (White, Brown ["mixed race"],  
28  
29 Black, Asian, and Indigenous; Asian and Indigenous were dropped from the analysis because of  
30  
31 their small sample size).  
32  
33

34  
35 In order to classify the neighborhoods by SES, we ran a principal component analysis to  
36  
37 reduce the same four census variables used in the definition of neighborhoods into two non-  
38  
39 correlated principal components. The first component was composed of *number of people per*  
40  
41 *household* and *proportion of children 0-4 years*, whereas the second component was composed  
42  
43 of *median income* and *percent of white residents*, explaining 87% of the data variability. We then  
44  
45 forced these two principal components into three hierarchical clusters, using the Ward's method,  
46  
47 to identify groups of neighborhoods with similar characteristics. The authors' empirical  
48  
49 knowledge of the area and the interpretation of the scores of each principal component within  
50  
51 each cluster allowed for the classification of the neighborhoods into low, intermediate, and high  
52  
53  
54  
55  
56  
57  
58  
59  
60



1  
2  
3 SES. Characteristics of these low, intermediate, and high SES neighborhoods are displayed in  
4  
5 Supplementary Table S1.  
6  
7  
8  
9

### 10 **Patient and public involvement**

11  
12 Patients were not involved in the development of this study.  
13  
14

### 15 **Statistical analysis**

16  
17 Hierarchical multilevel logistic regression models were ran as individuals (level 1) were nested  
18  
19 within neighborhoods (level 2), and the outcome variable (obesity) was dichotomous. Model 1  
20  
21 included our independent variable of interest (social cohesion, perceived safety, or perceived  
22  
23 violence) and age, while Model 2 was further adjusted by gender; education; skin color; ELSA  
24  
25 sites; an interaction term between gender and social cohesion, perceived safety, or perceived  
26  
27 violence; as well as individual-level scores on the social cohesion, perceived safety, and  
28  
29 perceived violence scales for the models with neighborhood social cohesion, perceived safety,  
30  
31 and perceived violence as predictors, respectively. This latter adjustment allowed us to account  
32  
33 for individual variations in neighborhood perceptions and to obtain neighborhood effects above  
34  
35 and beyond individual effects. Given that gender interactions for two out of our three  
36  
37 independent variables of interest were significant (social cohesion interaction p-value=0.0077;  
38  
39 perceived safety p-value=0.3569; perceived violence p-value=0.0363), we re-ran all models  
40  
41 stratified by gender.  
42  
43  
44  
45  
46  
47  
48  
49

50 To identify if the association between the neighborhood social environment and obesity  
51  
52 varied by neighborhood SES, we further stratified our analysis by neighborhood SES. For these  
53  
54 models, neighborhood-level scores of our three neighborhood variables were reconverted into  
55  
56  
57  
58  
59  
60

1  
2  
3 tertiles *within* each neighborhood SES category. All analyses were carried out in SAS v9.4 (SAS  
4  
5 Institute Inc., Cary, NC, USA) with a p-value<0.05 denoting statistical significance.  
6  
7  
8  
9

## 10 11 **RESULTS**

12  
13 Table 1 displays the sample characteristics for the whole sample and by obesity status. Women  
14  
15 comprised the majority of the sample (56%); compared to men in the sample, women had a  
16  
17 higher education and were more likely to be black. Obesity was more prevalent among women  
18  
19 (23%) than men (20%) and among middle-aged participants (46-65 years). We observed social  
20  
21 inequities based on education and skin color, with decreased obesity prevalence as education  
22  
23 increased, and black participants having the highest prevalence of obesity compared to white  
24  
25 participants (29% vs. 20%). We observed an obesity gradient for neighborhood social cohesion  
26  
27 and perceived violence, indicating that residents of the least cohesive and most self-perceived  
28  
29 violent neighborhoods had a higher prevalence of obesity than those in the most cohesive and  
30  
31 least violent neighborhoods, respectively. Residents of the poorest neighborhoods had a higher  
32  
33 obesity prevalence compared to those in the richest (26% vs. 19%).  
34  
35  
36  
37  
38

39 Results of the multilevel logistic regression models predicting obesity by neighborhood  
40  
41 social cohesion, perceived safety, and perceived violence are shown in Tables 2, 3, and 4,  
42  
43 respectively. Neighborhood social cohesion was associated with obesity for women only, and  
44  
45 this association remained after adjusting for age, education, skin color, and individual-level  
46  
47 social cohesion scores. In fully adjusted models, women who lived in the least socially cohesive  
48  
49 neighborhoods had 25% higher odds of being obese compared to women living in the most  
50  
51 socially cohesive neighborhoods (Table 2). We observed no associations between perceived  
52  
53 safety and obesity (Table 3). In turn, perceived violence was associated with obesity among  
54  
55  
56  
57  
58  
59  
60

women only: women living in the most violent neighborhoods had 28% higher odds of obesity compared to women who lived in the least violent neighborhoods, adjusting for age, education, skin color, and individual-level perceived violence scores (Table 4).

**Table 1:** Characteristics of the sub-sample of ELSA-Brasil participants included in the study, stratified by obesity status (N=11,456)

|                                                       | Not obese<br>(BMI<30<br>kg/m <sup>2</sup> )<br>Row % | Obese<br>(BMI≥30<br>kg/m <sup>2</sup> )<br>Row % | Total<br>N (%) |
|-------------------------------------------------------|------------------------------------------------------|--------------------------------------------------|----------------|
| <b>INDIVIDUAL-LEVEL VARIABLES</b>                     |                                                      |                                                  |                |
| <b>Gender</b>                                         |                                                      |                                                  |                |
| Women                                                 | 76.6                                                 | 23.4                                             | 6427 (56.1)    |
| Men                                                   | 80.1                                                 | 19.9                                             | 5025 (43.9)    |
| <b>Age group (years)</b>                              |                                                      |                                                  |                |
| 34-45                                                 | 81.9                                                 | 18.1                                             | 2841 (24.8)    |
| 46-55                                                 | 76.9                                                 | 23.1                                             | 4400 (38.4)    |
| 56-65                                                 | 76.4                                                 | 23.6                                             | 3077 (26.9)    |
| >65                                                   | 78.5                                                 | 21.5                                             | 1134 (9.9)     |
| <b>Education</b>                                      |                                                      |                                                  |                |
| Less than primary                                     | 72.0                                                 | 28.0                                             | 522 (4.6)      |
| Primary                                               | 73.8                                                 | 26.2                                             | 646 (5.6)      |
| Secondary                                             | 74.3                                                 | 25.7                                             | 3543 (30.9)    |
| University                                            | 81.1                                                 | 18.9                                             | 6741 (58.9)    |
| <b>Skin color</b>                                     |                                                      |                                                  |                |
| White                                                 | 80.3                                                 | 19.7                                             | 6127 (56.2)    |
| Brown                                                 | 77.3                                                 | 22.7                                             | 3052 (28.0)    |
| Black                                                 | 70.6                                                 | 29.4                                             | 1719 (15.8)    |
| <b>NEIGHBORHOOD-LEVEL VARIABLES</b>                   |                                                      |                                                  |                |
| <b>Social cohesion (mean 17.3, SD 3.6)</b>            |                                                      |                                                  |                |
| Lowest tertile (range 5 to <16.3; mean 14.3, SD 2.0)  | 76.0                                                 | 24.0                                             | 2156 (18.8)    |
| Middle tertile (range 16.3 to <18; mean 17.1, SD 0.4) | 78.3                                                 | 21.7                                             | 5671 (49.5)    |
| Highest tertile (range 18 to 25; mean 19.4, SD 1.5)   | 79.2                                                 | 20.8                                             | 3629 (31.7)    |
| <b>Perceived safety (mean 9.5, SD 3.2)</b>            |                                                      |                                                  |                |
| Lowest tertile (range 3 to <8.4; mean 6.5, SD 7.0)    | 76.8                                                 | 23.2                                             | 2899 (25.3)    |
| Middle tertile (range 8.4 to <10; mean 9.2, SD 0.4)   | 79.1                                                 | 20.9                                             | 4648 (40.6)    |
| Highest tertile (range 10 to 15; mean 11.3, SD 1.3)   | 78.1                                                 | 21.9                                             | 3909 (34.1)    |
| <b>Perceived violence (mean 16.8, SD 2.8)</b>         |                                                      |                                                  |                |
| Lowest tertile (range 7 to <16; mean 13.8, SD 1.8)    | 74.9                                                 | 25.1                                             | 2584 (22.6)    |
| Middle tertile (range 16 to <17.5; mean 16.7, SD 0.5) | 78.6                                                 | 21.4                                             | 4783 (41.8)    |
| Highest tertile (range 17.5 to 20; mean 18.5, SD 0.7) | 79.7                                                 | 20.3                                             | 4089 (35.7)    |
| <b>Neighborhood SES</b>                               |                                                      |                                                  |                |
| Low                                                   | 74.1                                                 | 25.9                                             | 2812 (24.6)    |
| Intermediate                                          | 76.9                                                 | 23.1                                             | 3418 (29.8)    |
| High                                                  | 81.2                                                 | 18.8                                             | 5225 (45.6)    |

**Table 2:** Results from the multilevel logistic regression model predicting obesity (BMI $\geq$ 30 kg/m<sup>2</sup>) by neighborhood social cohesion; gender-stratified (N= 6,092 women; 4,783 men)

|                         | Model 1<br>OR (95%CI)   |                  | Model 2<br>OR (95%CI)   |                         |
|-------------------------|-------------------------|------------------|-------------------------|-------------------------|
|                         | Women                   | Men              | Women                   | Men                     |
| <b>Neighborhood</b>     |                         |                  |                         |                         |
| <b>Social cohesion</b>  |                         |                  |                         |                         |
| Lowest tertile          | <b>1.43 (1.18-1.72)</b> | 0.99 (0.81-1.21) | <b>1.25 (1.02-1.53)</b> | 0.90 (0.72-1.13)        |
| Middle tertile          | 1.14 (0.97-1.32)        | 0.96 (0.82-1.13) | 1.07 (0.92-1.26)        | 0.95 (0.80-1.13)        |
| Highest tertile         | 1.00                    | 1.00             | 1.00                    | 1.00                    |
| <b>Age</b>              | <b>1.02 (1.01-1.03)</b> | 1.00 (0.99-1.01) | <b>1.02 (1.01-1.03)</b> | 1.00 (1.00-1.01)        |
| <b>Individual-level</b> |                         |                  |                         |                         |
| <b>social cohesion</b>  |                         |                  | 1.00 (0.98-1.02)        | 0.99 (0.97-1.01)        |
| <b>Education</b>        |                         |                  |                         |                         |
| Primary or less         |                         |                  | <b>1.46 (1.16-1.83)</b> | 1.10 (0.87-1.40)        |
| Secondary               |                         |                  | <b>1.48 (1.28-1.70)</b> | 1.10 (0.92-1.30)        |
| University              |                         |                  | 1.00                    | 1.00                    |
| <b>Skin color</b>       |                         |                  |                         |                         |
| Black                   |                         |                  | <b>1.86 (1.56-2.21)</b> | <b>1.45 (1.15-1.82)</b> |
| Brown                   |                         |                  | <b>1.38 (1.18-1.62)</b> | 1.13 (0.95-1.36)        |
| White                   |                         |                  | 1.00                    | 1.00                    |
| <b>ELSA site</b>        |                         |                  |                         |                         |
| Bahia                   |                         |                  | <b>0.62 (0.50-0.76)</b> | <b>0.56 (0.44-0.72)</b> |
| Espirito Santo          |                         |                  | <b>0.70 (0.51-0.96)</b> | 0.88 (0.63-1.23)        |
| Minas Gerais            |                         |                  | <b>0.75 (0.62-0.91)</b> | 0.91 (0.74-1.11)        |
| Rio de Janeiro          |                         |                  | 0.89 (0.71-1.11)        | 1.06 (0.84-1.33)        |
| Rio Grande do Sul       |                         |                  | 0.91 (0.74-1.12)        | 0.91 (0.72-1.16)        |
| Sao Paulo               |                         |                  | 1.00                    | 1.00                    |

**Table 3:** Results from the multilevel logistic regression model predicting obesity (BMI $\geq$ 30 kg/m<sup>2</sup>) by perceived neighborhood safety; gender-stratified (N= 6,092 women; 4,783 men)

|                         | Model 1<br>OR (95%CI)   |                  | Model 2<br>OR (95%CI)   |                         |
|-------------------------|-------------------------|------------------|-------------------------|-------------------------|
|                         | Women                   | Men              | Women                   | Men                     |
| <b>Neighborhood</b>     |                         |                  |                         |                         |
| <b>Perceived safety</b> |                         |                  |                         |                         |
| Lowest tertile          | 1.16 (0.97-1.38)        | 0.98 (0.82-1.18) | 1.15 (0.95-1.39)        | 1.06 (0.86-1.30)        |
| Middle tertile          | 0.94 (0.80-1.10)        | 0.92 (0.78-1.08) | 0.96 (0.82-1.12)        | 0.98 (0.83-1.17)        |
| Highest tertile         | 1.00                    | 1.00             | 1.00                    | 1.00                    |
| <b>Age</b>              | <b>1.02 (1.01-1.03)</b> | 1.00 (0.99-1.01) | <b>1.02 (1.01-1.03)</b> | 1.00 (1.00-1.01)        |
| <b>Individual-level</b> |                         |                  |                         |                         |
| <b>perceived safety</b> |                         |                  | 0.99 (0.97-1.02)        | 1.00 (0.98-1.03)        |
| <b>Education</b>        |                         |                  |                         |                         |
| Primary or less         |                         |                  | <b>1.48 (1.18-1.86)</b> | 1.10 (0.87-1.39)        |
| Secondary               |                         |                  | <b>1.49 (1.30-1.71)</b> | 1.09 (0.92-1.30)        |
| University              |                         |                  | 1.00                    | 1.00                    |
| <b>Skin color</b>       |                         |                  |                         |                         |
| Black                   |                         |                  | <b>1.87 (1.57-2.23)</b> | <b>1.44 (1.14-1.81)</b> |
| Brown                   |                         |                  | <b>1.39 (1.19-1.63)</b> | 1.13 (0.95-1.36)        |
| White                   |                         |                  | 1.00                    | 1.00                    |
| <b>ELSA site</b>        |                         |                  |                         |                         |
| Bahia                   |                         |                  | <b>0.59 (0.48-0.73)</b> | <b>0.56 (0.43-0.72)</b> |
| Espirito Santo          |                         |                  | <b>0.66 (0.48-0.90)</b> | 0.89 (0.64-1.24)        |
| Minas Gerais            |                         |                  | <b>0.71 (0.59-0.86)</b> | 0.92 (0.75-1.12)        |
| Rio de Janeiro          |                         |                  | 0.84 (0.67-1.05)        | 1.05 (0.83-1.32)        |
| Rio Grande do Sul       |                         |                  | 0.87 (0.71-1.07)        | 0.92 (0.72-1.17)        |
| Sao Paulo               |                         |                  | 1.00                    | 1.00                    |

**Table 4:** Results from the multilevel logistic regression model predicting obesity (BMI $\geq$ 30 kg/m<sup>2</sup>) by perceived neighborhood violence; gender-stratified (N= 6,092 women; 4,783 men)

|                           | Model 1<br>OR (95%CI)   |                  | Model 2<br>OR (95%CI)   |                         |
|---------------------------|-------------------------|------------------|-------------------------|-------------------------|
|                           | Women                   | Men              | Women                   | Men                     |
| <b>Neighborhood</b>       |                         |                  |                         |                         |
| <b>Perceived violence</b> |                         |                  |                         |                         |
| Lowest tertile            | <b>1.51 (1.27-1.80)</b> | 1.08 (0.90-1.30) | <b>1.28 (1.04-1.56)</b> | 1.07 (0.86-1.34)        |
| Middle tertile            | 1.07 (0.91-1.25)        | 0.98 (0.83-1.15) | 1.03 (0.88-1.20)        | 0.99 (0.84-1.18)        |
| Highest tertile           | 1.00                    | 1.00             | 1.00                    | 1.00                    |
| <b>Age</b>                | <b>1.02 (1.01-1.03)</b> | 1.00 (0.99-1.01) | <b>1.02 (1.01-1.03)</b> | 1.00 (1.00-1.01)        |
| <b>Individual-level</b>   |                         |                  |                         |                         |
| <b>perceived violence</b> |                         |                  | 0.98 (0.96-1.00)        | 0.99 (0.96-1.02)        |
| <b>Education</b>          |                         |                  |                         |                         |
| Primary or less           |                         |                  | <b>1.42 (1.13-1.78)</b> | 1.08 (0.86-1.38)        |
| Secondary                 |                         |                  | <b>1.44 (1.25-1.66)</b> | 1.08 (0.91-1.29)        |
| University                |                         |                  | 1.00                    | 1.00                    |
| <b>Skin color</b>         |                         |                  |                         |                         |
| Black                     |                         |                  | <b>1.82 (.153-2.17)</b> | <b>1.43 (1.13-1.81)</b> |
| Brown                     |                         |                  | <b>1.37 (1.17-1.61)</b> | 1.13 (0.94-1.35)        |
| White                     |                         |                  | 1.00                    | 1.00                    |
| <b>ELSA site</b>          |                         |                  |                         |                         |
| Bahia                     |                         |                  | <b>0.56 (0.45-0.70)</b> | <b>0.54 (0.42-0.70)</b> |
| Espírito Santo            |                         |                  | <b>0.67 (0.49-0.92)</b> | 0.89 (0.64-1.23)        |
| Minas Gerais              |                         |                  | <b>0.70 (0.58-0.84)</b> | 0.92 (0.75-1.11)        |
| Rio de Janeiro            |                         |                  | 0.81 (0.65-1.02)        | 1.02 (0.81-1.29)        |
| Rio Grande do Sul         |                         |                  | 0.84 (0.68-1.03)        | 0.90 (0.71-1.15)        |
| Sao Paulo                 |                         |                  | 1.00                    | 1.00                    |

<sup>1</sup>The perceived violence scale was constructed so that a higher score indicated a lower perceived violence. Therefore, the *lowest tertile* category represents neighborhoods with the highest perceived violence.

Table 5 displays the results of the analysis stratified by neighborhood SES. For social cohesion, our results remained only among women living in high SES neighborhoods: women in the least socially cohesive neighborhoods had 48% higher odds of obesity compared to women living in the most socially cohesive neighborhoods *within high SES neighborhoods*. Oppositely, our results with perceived violence remained for women in poor neighborhoods: *within low SES neighborhoods*, women living in the most (perceived)s violent neighborhoods had almost twice the odds of obesity compared to those living in the least (perceived) violent neighborhoods. Associations also emerged in the intermediate SES category, suggesting a dose-response association between perceived violence and obesity for those in low SES neighborhoods.

**Table 5:** Results from the multilevel logistic regression model predicting obesity ( $\text{BMI} \geq 30 \text{ kg/m}^2$ ) by neighborhood social cohesion, by perceived safety, and by perceived violence independently, and stratified by neighborhood socioeconomic status (SES) and gender<sup>1</sup>

|                           | High SES<br>OR (95% CI) |                  | Intermediate SES<br>OR (95%CI) |                  | Low SES<br>OR (95%CI)   |                  |
|---------------------------|-------------------------|------------------|--------------------------------|------------------|-------------------------|------------------|
|                           | Women                   | Men              | Women                          | Men              | Women                   | Men              |
| <b>Social cohesion</b>    |                         |                  |                                |                  |                         |                  |
| N                         | 2799                    | 2144             | 1882                           | 1371             | 1410                    | 1268             |
| Lowest tertile            | <b>1.48 (1.10-1.99)</b> | 1.03 (0.76-1.42) | 0.86 (0.59-1.26)               | 0.95 (0.63-1.45) | 1.43 (0.98-2.10)        | 0.92 (0.59-1.44) |
| Middle tertile            | 1.06 (0.82-1.37)        | 1.05 (0.80-1.38) | 1.03 (0.77-1.37)               | 0.83 (0.59-1.16) | 0.98 (0.73-1.33)        | 0.83 (0.58-1.20) |
| Highest tertile           | 1.00                    | 1.00             | 1.00                           | 1.00             | 1.00                    | 1.00             |
| <b>Perceived safety</b>   |                         |                  |                                |                  |                         |                  |
| N                         | 2797                    | 2144             | 1881                           | 1371             | 1408                    | 1268             |
| Lowest tertile            | 1.09 (0.80-1.48)        | 1.01 (0.73-1.40) | 0.81 (0.57-1.16)               | 1.11 (0.74-1.66) | 1.38 (0.93-2.02)        | 1.19 (0.76-1.86) |
| Middle tertile            | 1.00 (0.77-1.30)        | 0.87 (0.66-1.14) | 0.84 (0.63-1.13)               | 0.98 (0.70-1.37) | 1.27 (0.94-1.71)        | 0.99 (0.69-1.43) |
| Highest tertile           | 1.00                    | 1.00             | 1.00                           | 1.00             | 1.00                    | 1.00             |
| <b>Perceived violence</b> |                         |                  |                                |                  |                         |                  |
| N                         | 2792                    | 2134             | 1873                           | 1369             | 1406                    | 1267             |
| Lowest tertile            | 1.00 (0.73-1.37)        | 1.21 (0.85-1.72) | 1.22 (0.84-1.76)               | 1.03 (0.68-1.56) | <b>1.92 (1.28-2.90)</b> | 1.02 (0.63-1.66) |
| Middle tertile            | 0.87 (0.67-1.12)        | 1.08 (0.83-1.40) | 1.01 (0.75-1.38)               | 0.86 (0.60-1.22) | <b>1.70 (1.23-2.34)</b> | 1.03 (0.72-1.49) |
| Highest tertile           | 1.00                    | 1.00             | 1.00                           | 1.00             | 1.00                    | 1.00             |

<sup>1</sup>All models adjusted by age, education, skin color, ELSA site, as well as by individual-level social cohesion, perceived safety, and perceived violence scores for the neighborhood social cohesion, perceived safety, and perceived violence models, respectively.

<sup>2</sup>The perceived violence scale was constructed so that a higher score indicated a lower perceived violence. Therefore, the *lowest tertile* category represents neighborhoods with the highest perceived violence.

## DISCUSSION

In this study based on a civil-servant sample of adults living in six large cities in Brazil, we found that living in a neighborhood with low social cohesion and high levels of self-perceived violence was associated with higher odds of obesity among women but not men. After stratifying by neighborhood SES, the association between living in the least socially cohesive neighborhoods and obesity remained only among women living in high SES neighborhoods, whereas the association between living in the most (perceived) violent neighborhoods and obesity remained only for women residing in low SES neighborhoods.

Studies in Latin America<sup>19,20</sup> and elsewhere<sup>8</sup> also report an association between neighborhood violence and obesity among adults. The hypothesized mechanisms involved are a reduction in outdoor physical activity, related to the fear of being outdoors, as well as the direct stress caused by living in an unsafe neighborhood. There is support for both hypotheses in the literature, as neighborhood crime/violence is associated with a decreased physical activity,<sup>6-8</sup> and also with an increase in stress and a worse mental health.<sup>31,32</sup> Chronic stress, in turn, has been linked to an increased obesity risk due to its influence on weight-related behaviors and by dysregulating the hypothalamic-pituitary-adrenal axis, leading to abdominal fat deposition.<sup>33</sup>

There are mixed results in relation to neighborhood social cohesion and obesity in high-income countries,<sup>5,23,34</sup> though most studies have found protective effects.<sup>4</sup> As far as the authors know, no previous studies have looked at this association in Latin America. Similar to our findings, Cohen et al. (2006) found that residents of neighborhoods with lower collective efficacy – a concept highly linked to social cohesion – had higher BMIs in Los Angeles, CA, U.S.<sup>5</sup> Burdette et al. (2006), in turn, found no such association among women living in 20 U.S. cities.<sup>34</sup>



1  
2  
3 Social cohesion is hypothesized to act as a buffer from neighborhood-related stress and,  
4 through this mechanism, be protective of obesity.<sup>5</sup> Cohen et al. (2006) also suggest that adults in  
5 neighborhoods with higher social cohesion may be willing to intervene in aspects of the  
6 neighborhood that influence weight-related behaviors; for example, setting up sports leagues or  
7 influencing local food stores to carry healthier offerings.<sup>5</sup> However, the opposite can also be true,  
8 with residents in high-social-cohesion neighborhoods uniting for negative things as they pertain  
9 to obesity, for example, standing against soda taxation or against bans of unhealthy vending  
10 machines.<sup>4</sup>  
11  
12  
13  
14  
15  
16  
17  
18  
19  
20  
21

22 We found that neighborhood social cohesion and perceived violence only influences the  
23 obesity risk of Brazilian women and not men. This finding that women are more affected by their  
24 neighborhood environment, particularly the social one, is not new.<sup>24,35,36</sup> Rech et al. 2012 found  
25 that perception of safety during the day was associated with leisure walking among women but  
26 not men among a convenience sample of adults in Curitiba, Brazil.<sup>6</sup> Similarly, a study in Los  
27 Angeles, CA, U.S. found that women living in high-poverty neighborhoods exercised less than  
28 men, partly due to safety concerns associated with accessing outdoor parks.<sup>36</sup> Moreover,  
29 Guilcher et al. (2017) found that a higher neighborhood social cohesion was associated with  
30 lower odds of obesity only among women in a sample of adults in Toronto, Canada.<sup>23</sup> Reasons  
31 why neighborhood effects may be stronger for women than men include differences in their  
32 neighborhood perceptions (which is not the case in our sample), an increased exposure (i.e.  
33 women spending more time in their residential neighborhoods), or an increased vulnerability (i.e.  
34 women being more impacted by their surroundings).<sup>24</sup> Further, women are more often victims of  
35 sexual violence than men,<sup>3,8</sup> and this may influence the time they spend outdoors – and hence  
36  
37  
38  
39  
40  
41  
42  
43  
44  
45  
46  
47  
48  
49  
50  
51  
52  
53  
54  
55  
56  
57  
58  
59  
60

1  
2  
3 their physical activity levels – as well as their stress levels, particularly among women in low  
4  
5 SES neighborhoods.  
6

7  
8 A previous study conducted in the south of Brazil found neighborhood-level variations in  
9  
10 obesity prevalence for both men and women; however, neighborhood-level education was only  
11  
12 associated with obesity among women in the sample.<sup>37</sup> Another study using ELSA-Brasil data  
13  
14 found that the food and physical activity neighborhood environments were associated with  
15  
16 obesity among women but not men.<sup>38</sup> The results of these studies and our own suggest that the  
17  
18 neighborhood environment may matter for men's obesity risk, but the neighborhood factors  
19  
20 studied to date are relevant only for women. Future studies should further investigate which  
21  
22 neighborhood factors, if any, affect obesity risk among men in Brazil and other Latin American  
23  
24 settings, as well as the reason why neighborhood factors may affect women's and men's obesity  
25  
26 risk differently.  
27  
28  
29  
30  
31

32 Finally, we found that the effect of social cohesion and perceived violence on obesity  
33  
34 among women varied by neighborhood SES. Two studies of the neighborhood social  
35  
36 environments in Brazil have found differential effects of these neighborhood variables on  
37  
38 physical activity by *individual*-level SES. Andrade et al. (2015) reports a positive association  
39  
40 between social cohesion and physical activity only among low-SES individuals in Belo  
41  
42 Horizonte, Brazil.<sup>22</sup> This contradicts our findings that a lower social cohesion was associated  
43  
44 with a higher obesity risk among women living in high-SES neighborhoods. In turn, Rech et al.  
45  
46 (2012) found that negative associations between safety perceptions and physical inactivity in  
47  
48 Curitiba, Brazil were only present among high-SES individuals.<sup>6</sup> We found that perceived  
49  
50 neighborhood violence increased obesity risk among women in low-SES neighborhoods only.  
51  
52  
53  
54  
55  
56  
57  
58  
59  
60

1  
2  
3 Even though we found minimal variations in perceived violence scores by neighborhood  
4 SES in our sample (Supplementary Table S1), women living in low SES neighborhoods may be  
5 more impacted by their perceived neighborhood violence than those living in high SES  
6 neighborhoods. For example, residents of high SES neighborhoods may be more likely to have  
7 cars and access (monetary and physical) to indoor places for exercising (e.g. gyms). This would  
8 mean that high-SES neighborhood residents could more effectively avoid spending time  
9 outdoors in their neighborhoods without this having a severe impact on their physical activity  
10 behaviors and/or stress, the suggested mechanisms linking perceived violence and obesity.  
11 Scores of neighborhood social cohesion are also similar in our sample across neighborhood SES  
12 categories (Supplementary Table S1). Why social cohesion would be associated with obesity  
13 only among women residing in high-SES neighborhoods requires further investigation.  
14  
15  
16  
17  
18  
19  
20  
21  
22  
23  
24  
25  
26  
27  
28

29 Our results suggest that neighborhood interventions to increase social cohesion and  
30 decrease violence perceptions may prevent obesity among women in Brazil. Effective  
31 neighborhood interventions designed to reduce violence may include the cleaning and greening  
32 of vacant lots, as well as the reduction of alcohol availability.<sup>39</sup> Though the effect of these kinds  
33 of interventions on *perceived* violence is unknown, research suggests that *fear of crime* may be  
34 negatively influenced by neglected and run-down neighborhood spaces.<sup>40</sup> The greening of vacant  
35 lots may also work at increasing social cohesion and social interactions, based on evidence  
36 available from public gardening research.<sup>41</sup> Increasing access to safe public spaces may also help  
37 increase social cohesion and thus *may* decrease obesity risk. Salvo et al.,<sup>42</sup> for example, found  
38 that residents of Bogota, Colombia and Cuernavaca, Mexico reported shopping malls and  
39 nightclubs as places where they engaged in physical activity with friends, highlighting that  
40 public places that allow for social interactions may be important for weight-related behaviors.  
41  
42  
43  
44  
45  
46  
47  
48  
49  
50  
51  
52  
53  
54  
55  
56  
57  
58  
59  
60

1  
2  
3 Another option to potentially increase neighborhood trust and thus social cohesion while  
4 reducing crime is instituting neighborhood watches.<sup>43</sup> It can be argued, however, that  
5 participating in neighborhood watches may increase crime awareness and, thus, have a  
6 counteractive effect.<sup>40</sup>  
7  
8  
9  
10  
11  
12  
13  
14

### 15 **Strengths and limitations**

16  
17 This study is based on civil-servants in six large cities in Brazil; therefore, our sample excludes  
18 the extremely poor and unemployed and so our results may only be generalizable to Brazilian  
19 adults with stable employment. However, the ELSA-Brasil sample is diverse in terms of  
20 sociodemographic characteristics, including diverse regions within Brazil. Moreover, whereas  
21 the ELSA-Brasil sample has, on average, a higher income and social class than the residents of  
22 the six included cities,<sup>27,44</sup> the ELSA-Brasil sample has a similar prevalence of obesity and  
23 obesity-related behaviors (i.e. diet and physical activity patterns) than the Brazilian population at  
24 large.<sup>45</sup>  
25  
26  
27  
28  
29  
30  
31  
32  
33  
34  
35  
36

37 Data collection was based on validated questionnaires and scales, as well as direct body  
38 measurements which allowed us to estimate obesity based on measured weight and height as  
39 opposed to self-reports. Even though the neighborhood social environment variables were  
40 obtained from these validated scales, they are still self-reported, and we did not have access to  
41 objective measures of crime/violence in the neighborhood. Moreover, the internal consistency of  
42 these scales, particularly for social cohesion (Cronbach's alpha=0.60)<sup>30</sup> was not ideal. In terms of  
43 the analysis, as most research using artificial neighborhood boundaries, results may vary if  
44 neighborhoods were to be defined in a different manner. Similarly, using a different way to  
45 categorize neighborhoods into low, middle, and high levels of social cohesion, perceived safety,  
46  
47  
48  
49  
50  
51  
52  
53  
54  
55  
56  
57  
58  
59  
60

1  
2  
3 and perceived violence instead of tertiles may lead to different results. We aggregated individual-  
4  
5 level scores from the social cohesion, perceived safety, and perceived violence scales to the  
6  
7 neighborhood level so that all participants in the same neighborhood would have the same level  
8  
9 of exposure. While this is standard procedure for the use of these scales,<sup>28,29</sup> the aggregate values  
10  
11 are based only on the ELSA-Brasil sample and not on a representative sample of neighborhood  
12  
13 residents. Another limitation includes the cross-sectional design, which prevents us from  
14  
15 establishing the directionality of the associations. While some researchers question the validity  
16  
17 of associating neighborhood-level variables with health outcomes due to people self-selecting  
18  
19 into neighborhoods,<sup>46</sup> the ELSA-Brasil population is highly stable, with an average length of  
20  
21 residence in their current neighborhood of 15 years.  
22  
23  
24  
25  
26  
27  
28

## 29 **CONCLUSIONS**

30  
31  
32 To our knowledge, this is one of the few studies in Latin America examining the association  
33  
34 between the neighborhood social environment and obesity, providing key insights into the  
35  
36 likelihood of success of neighborhood-level interventions addressing obesity in the Brazilian  
37  
38 context, in particular. Our results suggest that an increase in neighborhood social cohesion and a  
39  
40 reduction in the perception of neighborhood violence may be protective of obesity among  
41  
42 Brazilian women, with the latter particularly true for women living in poor neighborhoods.  
43  
44 Further research is needed to test some of the proposed interventions (e.g. greening of vacant  
45  
46 lots, increasing access to public spaces, instituting neighborhood watches) in Brazil and other  
47  
48 Latin American countries, with an aim to strengthen existing communities while improving the  
49  
50 public's health. Future research should also clarify the reasons why the neighborhood social  
51  
52  
53  
54  
55  
56  
57  
58  
59  
60

1  
2  
3  
4  
5  
6  
7  
8  
9  
10  
11  
12  
13  
14  
15  
16  
17  
18  
19  
20  
21  
22  
23  
24  
25  
26  
27  
28  
29  
30  
31  
32  
33  
34  
35  
36  
37  
38  
39  
40  
41  
42  
43  
44  
45  
46  
47  
48  
49  
50  
51  
52  
53  
54  
55  
56  
57  
58  
59  
60

environment in both high and low- and middle-income countries seem to affect women more than men.

For peer review only

## ACKNOWLEDGEMENTS

We thank all ELSA-Brasil participants for their invaluable contribution to this study.

## DATA SHARING

The data used in this study are available for research proposals on request to the ELSA's Datacenter and to the ELSA's Publications Committee (publiELSA). Additional information can be obtained from the ELSA's Datacenter ([estatisticaelsa@ufrgs.br](mailto:estatisticaelsa@ufrgs.br)) and from the ELSA Coordinator from the Research Center of Rio de Janeiro ([rohgriep@ioc.fiocruz.br](mailto:rohgriep@ioc.fiocruz.br)).

## DISCLOSURE

The authors declared no conflict of interest.

## FUNDING

This study was funded by the Brazilian Ministry of Health (Department of Science and Technology) and the Brazilian Ministry of Science, Technology and Innovation (FINEP, Financiadora de Estudos e Projetos and CNPq, National Research Council), Grant No 01 06 0010.00, 01 06 0212.00, 01 06 0300.00, 01 06 0278.00, 01 06 0115.00 and 01 06 0071.00. DC, LG, RHG, SMB, and SMAM are research fellows of the National Research Council (CNPq). DC, LOC, and RHG are supported by a research grant (*Cientistas do Nosso Estado*) from the *Fundação de Amparo à Pesquisa do Estado do Rio de Janeiro - FAPERJ*, Brazil. MPC received a COR Research Fellowship from the Tulane University Senate Committee on Research and the Tulane Provost's Office, which funded her travels to Brazil.

**REFERENCES**

1. Diez-Roux AV, Mair C. Neighborhoods and health. *Ann NY Acad Sci* 2010;1186(1):125-145.
2. Gee GC, Payne-Sturges DC. Environmental health disparities: a framework integrating psychosocial and environmental concepts. *Environ Health Perspect* 2004;112(17):1645-1653.
3. Suglia SF, Shelton RC, Hsiao A, Wang YC, Rundle A, Link BG. Why the neighborhood social environment is critical in obesity prevention. *J Urban Health* 2016;93(1):206-212.
4. Carrillo-Alvarez E, Kawachi I, Riera-Romani J. Neighbourhood social capital and obesity: a systematic review of the literature. *Obes Rev* 2019;20:119-141.
5. Cohen DA, Finch BK, Bower A, Sastry N. Collective efficacy and obesity: The potential influence of social factors on health. *Soc Sci Med* 2006;62(3):769-778.
6. Rech CR, Reis RS, Hino AAF, et al. Neighborhood safety and physical inactivity in adults from Curitiba, Brazil. *Int J Behav Nutr Phys Act.* 2012;9(1):72.
7. Weber Corseuil M, Hallal PC, Xavier Corseuil H, Jayce Ceola Schneider I, d'Orsi E. Safety from crime and physical activity among older adults: a population-based study in Brazil. *J Environ Public Health* 2012;2012:7.
8. Yu E, Lippert Adam M. Neighborhood crime rate, weight-related behaviors, and obesity: a systematic review of the literature. *Sociol Compass* 2016;10(3):187-207.
9. Lovasi GS, Hutson MA, Guerra M, Neckerman KM. Built environments and obesity in disadvantaged populations. *Epidemiol Rev* 2009;31(1):7-20.
10. Kline L, Jones-Smith J, Miranda JJ, et al. A research agenda to guide progress on childhood obesity prevention in Latin America. *Obes Rev* 2017;18(S2):19-27.



- 1  
2  
3 11. Rivera JÁ, de Cossío TG, Pedraza LS, Aburto TC, Sánchez TG, Martorell R. Childhood  
4 and adolescent overweight and obesity in Latin America: a systematic review. *Lancet*  
5  
6 *Diab Endocrinol* 2014;2(4):321-332.  
7
- 8  
9  
10 12. Pérez-Escamilla R, Lutter CK, Rabadan-Diehl C, et al. Prevention of childhood obesity  
11 and food policies in Latin America: from research to practice. *Obes Rev* 2017;18(S2):28-  
12  
13 38.  
14
- 15  
16 13. Brazilian Ministry of Health, 2017. [VIGITEL Brasil 2016. Habits of Brazilians affect  
17 the growth in obesity and the increased prevalence of diabetes and hypertension];  
18  
19 <http://portalarquivos.saude.gov.br/images/pdf/2017/abril/17/Vigitel.pdf>. Accessed  
20  
21 February 15, 2019.  
22  
23
- 24  
25 14. Molina M, Serván-Mori E, Quezada AD, Colchero MA. Is there a link between  
26 availability of food and beverage establishments and BMI in Mexican adults? *Public*  
27  
28 *Health Nutr* 2017;20(18):3326-3332.  
29  
30
- 31  
32 15. Chor D, Cardoso LO, Nobre AA, et al. Association between perceived neighbourhood  
33 characteristics, physical activity and diet quality: results of the Brazilian Longitudinal  
34  
35 Study of Adult Health (ELSA-Brasil). *BMC Public Health*. 2016;16:751.  
36  
37
- 38  
39 16. Hino AAF, Rech CR, Gonçalves PB, Reis R. Perceived neighborhood environment and  
40 leisure time physical activity among adults from Curitiba, Brazil. *Rev Bras Cineantropom*  
41  
42 *Desempenho Hum* 2017;19:596-607.  
43  
44
- 45  
46 17. Mendonça G, Florindo AA, Rech CR, de Freitas DKS, de Farias Júnior JC. Perceived  
47 neighborhood environmental characteristics and different types of physical activity  
48  
49 among Brazilian adolescents. *J Sport Sci* 2018;36(9):1068-1075.  
50  
51  
52  
53  
54  
55  
56  
57  
58  
59  
60

18. Gómez LF, Parra DC, Buchner D, et al. Built environment attributes and walking patterns among the elderly population in Bogota. *Am J Prev Med.* 2010;38(6):592-599.
19. Martinez L, Prada S, Estrada D. Homicides, public goods, and population health in the context of high urban violence rates in Cali, Colombia. *J Urban Health* 2018;95:391-400.
20. Mendes LL, Nogueira H, Padez C, Ferrao M, Velasquez-Melendez G. Individual and environmental factors associated for overweight in urban population of Brazil. *BMC Public Health* 2013;13:988-988.
21. Florindo AA, Salvador EP, Reis RS, Guimarães VV. Perception of the environment and practice of physical activity by adults in a low socioeconomic area. *Rev Saude Publica* 2011;45:302-310.
22. Andrade ACdS, Peixoto SV, Friche AAdL, et al. Social context of neighborhood and socioeconomic status on leisure-time physical activity in a Brazilian urban center: The BH Health Study. *Cad Saude Publica* 2015;31:136-147.
23. Guilcher SJT, Kaufman-Shriqui V, Hwang J, et al. The association between social cohesion in the neighborhood and body mass index (BMI): An examination of gendered differences among urban-dwelling Canadians. *Prev Med.* 2017;99:293-298.
24. Stafford M, Cummins S, Macintyre S, Ellaway A, Marmot M. Gender differences in the associations between health and neighbourhood environment. *Soc Sci Med* 2005;60(8):1681-1692.
25. Aquino EM, Barreto SM, Bensenor IM, et al. Brazilian Longitudinal Study of Adult Health (ELSA-Brasil): objectives and design. *Am J Epidemiol* 2012;175(4):315-324.
26. Santos SM, Chor D, Loureiro Werneck G. Demarcation of local neighborhoods to study relations between contextual factors and health. *Int J Health Geo.* 2010;9:34.

- 1  
2  
3 27. Instituto Brasileiro de Geografia e Estatística (IBGE). 2010 Population Census. n.d.;  
4  
5 <https://ww2.ibge.gov.br/english/estatistica/populacao/censo2010/default.shtm>. Accessed  
6  
7 Aug 3, 2017.  
8  
9
- 10 28. Sampson RJ, Raudenbush SW, Earls F. Neighborhoods and violent crime: A multilevel  
11  
12 study of collective efficacy. *Science* 1997;277:918-924.  
13
- 14 29. Mujahid MS, Diez-Roux A, Morenoff JD, Raghunathan T. Assessing the measurement  
15  
16 properties of neighborhood scales: from psychometrics to econometrics. *Am J Epidemiol*  
17  
18 2007;165:858-867.  
19
- 20 30. Santos SM, Griep RH, Cardoso LO, et al. Cross-cultural adaptation and reliability of  
21  
22 measurements on self-reported neighborhood characteristics in ELSA-Brasil. *Rev Saude*  
23  
24 *Publica*. 2013;47 Suppl 2:122-130.  
25  
26
- 27 31. Stockdale SE, Wells KB, Tang L, Belin TR, Zhang L, Sherbourne CD. The importance of  
28  
29 social context: Neighborhood stressors, stress-buffering mechanisms, and alcohol, drug,  
30  
31 and mental health disorders. *Soc Sci Med* 2007;65(9):1867-1881.  
32  
33
- 34 32. Stafford M, Chandola T, Marmot M. Association between fear of crime and mental  
35  
36 health and physical functioning. *Am J Public Health* 2007;97(11):2076-2081.  
37  
38
- 39 33. Björntorp P. Do stress reactions cause abdominal obesity and comorbidities? *Obes Rev*  
40  
41 2001;2(2):73-86.  
42  
43
- 44 34. Burdette HL, Wadden TA, Whitaker RC. Neighborhood safety, collective efficacy, and  
45  
46 obesity in women with young children. *Obesity* 2006;14(3):518-525.  
47  
48  
49  
50  
51  
52  
53  
54  
55  
56  
57  
58  
59  
60

- 1  
2  
3 35. Boing AF, Subramanian SV. The influence of area-level education on body mass index,  
4 waist circumference and obesity according to gender. *Int J Public Health* 2015;60:727-  
5 736.  
6  
7  
8  
9  
10 36. Derose KP, Han B, Williamson S, Cohen DA. Gender disparities in park use and physical  
11 activity among residents of high-poverty neighborhoods in Los Angeles. *Women Health*  
12 *Issues* 2018;28(1):6-13.  
13  
14  
15  
16  
17 37. Astell-Burt T, Feng X, Kolt GS, Jalaludin B. Does rising crime lead to increasing  
18 distress? Longitudinal analysis of a natural experiment with dynamic objective  
19 neighbourhood measures. *Soc Sci Med* 2015;138:68-73.  
20  
21  
22  
23  
24 38. Pereira de Castro OC, Araujo Nobre A, Ribeiro de Castro IR, Chor D, Harter Griep R, de  
25 Oliveira Cardoso L. Does context influence the Body Mass Index of Brazilian workers?  
26 Results from the ELSA-Brasil study baseline. Manuscript submitted for publication.  
27  
28  
29  
30  
31 39. Kondo MC, Andreyeva E, South EC, MacDonald JM, Branas CC. Neighborhood  
32 interventions to reduce violence. *Ann Rev Public Health* 2018;39(1):253-271.  
33  
34  
35  
36 40. Lorenc T, Clayton S, Neary D, et al. Crime, fear of crime, environment, and mental  
37 health and wellbeing: Mapping review of theories and causal pathways. *Health Place*  
38 2012;18:757-765.  
39  
40  
41  
42 41. Armstrong D. A survey of community gardens in upstate New York: Implications for  
43 health promotion and community development. *Health Place* 2000;6(4):319-327.  
44  
45  
46  
47 42. Salvo D, Sarmiento OL, Reis RS, et al. Where Latin Americans are physically active, and  
48 why does it matter? Findings from the IPEN-adult study in Bogota, Colombia;  
49 Cuernavaca, Mexico; and Curitiba, Brazil. *Prev Med.* 2017;103:S27-S33.  
50  
51  
52  
53  
54  
55  
56  
57  
58  
59  
60

- 1  
2  
3 43. Bennett T, Holloway K, Farrington DP. Does neighborhood watch reduce crime? A  
4  
5 systematic review and meta-analysis. *J Exp Criminol* 2006;2(4):437-458.  
6  
7  
8 44. Camilo de Oliveira AMH, Furlan Antigo M, Rabelo A. [Occupational typologies applied  
9  
10 to the socioeconomic analysis of the ELSA sample]. Report for CEDEPLAR/UFMG, Jult  
11  
12 2013.  
13  
14  
15 45. Schmidt MI, Duncan BB, Mill, JG, et al. Cohort profile: Longitudinal Study of Adult  
16  
17 Health (ELSA-Brasil). *Int J Epidemiol* 2015;44:68-75.  
18  
19  
20 46. Hedman L, van Ham M. *Understanding neighbourhood effects: Selection bias and*  
21  
22 *residential mobility*. In: van Ham M, Manley D, Bailey N, Simpson L, Maclennan D,  
23  
24 editors. *Neighbourhood effects research: New perspectives*. Springer, 2012. (pg. 79-99).  
25  
26  
27  
28  
29  
30  
31  
32  
33  
34  
35  
36  
37  
38  
39  
40  
41  
42  
43  
44  
45  
46  
47  
48  
49  
50  
51  
52  
53  
54  
55  
56  
57  
58  
59  
60

**SUPPLEMENTARY TABLE**

**Supplementary Table S1: Neighborhood characteristics by SES cluster (N=1902 neighborhoods where the sample lived)**

|                                  | Low SES<br>N=753 |        |                | Intermediate SES<br>N=550 |        |                 | High SES<br>N=598 |         |                 |
|----------------------------------|------------------|--------|----------------|---------------------------|--------|-----------------|-------------------|---------|-----------------|
|                                  | Mean             | SD     | IQR            | Mean                      | SD     | IQR             | Mean              | SD      | IQR             |
| Proportion of children 0-4 years | 6.85             | 1.17   | 6.03-7.62      | 5.29                      | 0.98   | 4.62-5.90       | 3.93              | 1.04    | 3.26-4.48       |
| Number of people per household   | 3.27             | 0.19   | 3.15-3.37      | 3.02                      | 0.18   | 2.90-3.14       | 2.59              | 0.31    | 2.35-2.81       |
| % White                          | 32.11            | 15.07  | 16.31-43.10    | 59.70                     | 13.79  | 50.68-69.04     | 81.24             | 10.14   | 74.79-89.11     |
| Median income (\$R)              | 946.56           | 292.02 | 733.13-1102.92 | 1916.65                   | 750.63 | 1395.50-2209.20 | 4758.85           | 2290.00 | 3003.02-6001.70 |
| Social capital                   | 16.79            | 2.96   | 15.25-18.40    | 17.17                     | 2.62   | 16.00-18.75     | 17.45             | 1.93    | 16.40-18.62     |
| Perceived safety                 | 8.84             | 2.61   | 7.00-10.50     | 9.35                      | 2.49   | 8.00-11.00      | 9.51              | 1.96    | 8.25-10.75      |
| Perceived violence               | 15.68            | 2.53   | 14.20-17.50    | 16.71                     | 2.06   | 15.81-18.00     | 17.04             | 1.67    | 16.33-18.00     |

*Abbreviations:* SES=socioeconomic status; SD=standard deviation; IQR= interquartile range

Note: The perceived violence scale was constructed so that a higher score indicated a lower perceived violence.

STROBE Statement—Checklist of items that should be included in reports of *cross-sectional studies*

|                              | Item No | Page No      | Recommendation                                                                                                                                                                                                                                                                                                                                                                                                                             |
|------------------------------|---------|--------------|--------------------------------------------------------------------------------------------------------------------------------------------------------------------------------------------------------------------------------------------------------------------------------------------------------------------------------------------------------------------------------------------------------------------------------------------|
| <b>Title and abstract</b>    | 1       | 1            | (a) Indicate the study's design with a commonly used term in the title or the abstract<br><i>The term "cohort study" is included in the title</i>                                                                                                                                                                                                                                                                                          |
|                              |         | 3            | (b) Provide in the abstract an informative and balanced summary of what was done and what was found                                                                                                                                                                                                                                                                                                                                        |
| <b>Introduction</b>          |         |              |                                                                                                                                                                                                                                                                                                                                                                                                                                            |
| Background/rationale         | 2       | 6-7          | Explain the scientific background and rationale for the investigation being reported                                                                                                                                                                                                                                                                                                                                                       |
| Objectives                   | 3       | 7            | State specific objectives, including any prespecified hypotheses                                                                                                                                                                                                                                                                                                                                                                           |
| <b>Methods</b>               |         |              |                                                                                                                                                                                                                                                                                                                                                                                                                                            |
| Study design                 | 4       | 7            | Present key elements of study design early in the paper                                                                                                                                                                                                                                                                                                                                                                                    |
| Setting                      | 5       | 7            | Describe the setting, locations, and relevant dates, including periods of recruitment, exposure, follow-up, and data collection                                                                                                                                                                                                                                                                                                            |
| Participants                 | 6       | 7            | (a) Give the eligibility criteria, and the sources and methods of selection of participants                                                                                                                                                                                                                                                                                                                                                |
| Variables                    | 7       | 8-11         | Clearly define all outcomes, exposures, predictors, potential confounders, and effect modifiers. Give diagnostic criteria, if applicable                                                                                                                                                                                                                                                                                                   |
| Data sources/<br>measurement | 8*      | 8-11         | For each variable of interest, give sources of data and details of methods of assessment (measurement). Describe comparability of assessment methods if there is more than one group                                                                                                                                                                                                                                                       |
| Bias                         | 9       | 10           | Describe any efforts to address potential sources of bias<br><i>Explained covariate adjustment to control for confounding</i>                                                                                                                                                                                                                                                                                                              |
|                              | 10      | 8            | Explain how the study size was arrived at                                                                                                                                                                                                                                                                                                                                                                                                  |
| Quantitative variables       | 11      | 8-12         | Explain how quantitative variables were handled in the analyses. If applicable, describe which groupings were chosen and why                                                                                                                                                                                                                                                                                                               |
| Statistical methods          | 12      | 11-12        | (a) Describe all statistical methods, including those used to control for confounding<br>(b) Describe any methods used to examine subgroups and interactions<br>(c) Explain how missing data were addressed<br>(d) If applicable, describe analytical methods taking account of sampling strategy<br>(e) Describe any sensitivity analyses<br><i>No sensitivity analyses done</i>                                                          |
| <b>Results</b>               |         |              |                                                                                                                                                                                                                                                                                                                                                                                                                                            |
| Participants                 | 13*     | 8            | (a) Report numbers of individuals at each stage of study—eg numbers potentially eligible, examined for eligibility, confirmed eligible, included in the study, completing follow-up, and analysed<br>(b) Give reasons for non-participation at each stage<br>(c) Consider use of a flow diagram<br><i>Authors consider this unnecessary as data collection has been explained in previous publications at length (cited in this paper)</i> |
| Descriptive data             | 14*     | 12<br>Table1 | (a) Give characteristics of study participants (eg demographic, clinical, social) and information on exposures and potential confounders<br>(b) Indicate number of participants with missing data for each variable of                                                                                                                                                                                                                     |

|                          |     |                        |                                                                                                                                                                                                                                                                                                                                                                                                                                        |
|--------------------------|-----|------------------------|----------------------------------------------------------------------------------------------------------------------------------------------------------------------------------------------------------------------------------------------------------------------------------------------------------------------------------------------------------------------------------------------------------------------------------------|
|                          |     |                        | interest                                                                                                                                                                                                                                                                                                                                                                                                                               |
|                          |     |                        | <i>WOMEN max sample = 8218 (all have age and education)</i>                                                                                                                                                                                                                                                                                                                                                                            |
|                          |     |                        | <i>8218 – 395 with missing skin color = 7823</i>                                                                                                                                                                                                                                                                                                                                                                                       |
|                          |     |                        | <i>7823 – 3 missing obesity = 7820</i>                                                                                                                                                                                                                                                                                                                                                                                                 |
|                          |     |                        | <i>7820 – 1713 missing neighborhood (and hence, all neighborhood values)</i>                                                                                                                                                                                                                                                                                                                                                           |
|                          |     |                        | <i>= 6107 → ANALYTICAL SAMPLE</i>                                                                                                                                                                                                                                                                                                                                                                                                      |
|                          |     |                        | <i>MEN max sample = 6887 (all have age and education)</i>                                                                                                                                                                                                                                                                                                                                                                              |
|                          |     |                        | <i>6887 – 320 with missing skin color = 6567</i>                                                                                                                                                                                                                                                                                                                                                                                       |
|                          |     |                        | <i>6567 – 3 missing obesity = 6564</i>                                                                                                                                                                                                                                                                                                                                                                                                 |
|                          |     |                        | <i>6564 – 1773 missing neighborhood (and hence, all neighborhood values)</i>                                                                                                                                                                                                                                                                                                                                                           |
|                          |     |                        | <i>= 4791 → ANALYTICAL SAMPLE</i>                                                                                                                                                                                                                                                                                                                                                                                                      |
| Outcome data             | 15* | 12<br>Table1           | Report numbers of outcome events or summary measures                                                                                                                                                                                                                                                                                                                                                                                   |
| Main results             | 16  | 12,13<br>Tables<br>2-5 | (a) Give unadjusted estimates and, if applicable, confounder-adjusted estimates and their precision (eg, 95% confidence interval). Make clear which confounders were adjusted for and why they were included<br>(b) Report category boundaries when continuous variables were categorized<br>(c) If relevant, consider translating estimates of relative risk into absolute risk for a meaningful time period<br><i>Not applicable</i> |
| Other analyses           | 17  | 13<br>Table5           | Report other analyses done—eg analyses of subgroups and interactions, and sensitivity analyses<br><i>Subgroups analyses are explained; no sensitivity analyses reported</i>                                                                                                                                                                                                                                                            |
| <b>Discussion</b>        |     |                        |                                                                                                                                                                                                                                                                                                                                                                                                                                        |
| Key results              | 18  | 19                     | Summarise key results with reference to study objectives                                                                                                                                                                                                                                                                                                                                                                               |
| Limitations              | 19  | 23                     | Discuss limitations of the study, taking into account sources of potential bias or imprecision. Discuss both direction and magnitude of any potential bias                                                                                                                                                                                                                                                                             |
| Interpretation           | 20  | 24                     | Give a cautious overall interpretation of results considering objectives, limitations, multiplicity of analyses, results from similar studies, and other relevant evidence                                                                                                                                                                                                                                                             |
| Generalisability         | 21  | 23                     | Discuss the generalisability (external validity) of the study results                                                                                                                                                                                                                                                                                                                                                                  |
| <b>Other information</b> |     |                        |                                                                                                                                                                                                                                                                                                                                                                                                                                        |
| Funding                  | 22  | 25                     | Give the source of funding and the role of the funders for the present study and, if applicable, for the original study on which the present article is based                                                                                                                                                                                                                                                                          |

\*Give information separately for exposed and unexposed groups.

**Note:** An Explanation and Elaboration article discusses each checklist item and gives methodological background and published examples of transparent reporting. The STROBE checklist is best used in conjunction with this article (freely available on the Web sites of PLoS Medicine at <http://www.plosmedicine.org/>, Annals of Internal Medicine at <http://www.annals.org/>, and Epidemiology at <http://www.epidem.com/>). Information on the STROBE Initiative is available at [www.strobe-statement.org](http://www.strobe-statement.org).
