# Supplementary material for: The association between the neighbourhood social environment and obesity in Brazil: a cross-sectional analysis of the ELSA-Brasil study
Source: PubMed Central journal article supplement — BMJ Open. 2019 Sep 6;9(9):e026800. doi: 10.1136/bmjopen-2018-026800 (PMC6731797; doi:10.1136/bmjopen-2018-026800), 2019-09-06
Supplement: bmjopen-2018-026800supp001.pdf [file bmjopen-2018-026800supp001.pdf]

## SUPPLEMENTARY TABLE

Supplementary Table S1: Neighborhood characteristics by SES cluster (N=1902 neighborhoods where the sample lived)

|                                  | Low SES<br>N=753 |        |                | Intermediate SES<br>N=550 |        |                 | High SES<br>N=598 |         |                 |
|----------------------------------|------------------|--------|----------------|---------------------------|--------|-----------------|-------------------|---------|-----------------|
|                                  | Mean             | SD     | IQR            | Mean                      | SD     | IQR             | Mean              | SD      | IQR             |
| Proportion of children 0-4 years | 6.85             | 1.17   | 6.03-7.62      | 5.29                      | 0.98   | 4.62-5.90       | 3.93              | 1.04    | 3.26-4.48       |
| Number of people per household   | 3.27             | 0.19   | 3.15-3.37      | 3.02                      | 0.18   | 2.90-3.14       | 2.59              | 0.31    | 2.35-2.81       |
| % White                          | 32.11            | 15.07  | 16.31-43.10    | 59.70                     | 13.79  | 50.68-69.04     | 81.24             | 10.14   | 74.79-89.11     |
| Median income (\$R)              | 946.56           | 292.02 | 733.13-1102.92 | 1916.65                   | 750.63 | 1395.50-2209.20 | 4758.85           | 2290.00 | 3003.02-6001.70 |
| Social capital                   | 16.79            | 2.96   | 15.25-18.40    | 17.17                     | 2.62   | 16.00-18.75     | 17.45             | 1.93    | 16.40-18.62     |
| Perceived safety                 | 8.84             | 2.61   | 7.00-10.50     | 9.35                      | 2.49   | 8.00-11.00      | 9.51              | 1.96    | 8.25-10.75      |
| Perceived violence               | 15.68            | 2.53   | 14.20-17.50    | 16.71                     | 2.06   | 15.81-18.00     | 17.04             | 1.67    | 16.33-18.00     |

*Abbreviations:* SES=socioeconomic status; SD=standard deviation; IQR= interquartile range

Note: The perceived violence scale was constructed so that a higher score indicated a lower perceived violence.
